# Supplementary material for: Inhibition of angiogenesis and regenerative lung growth in Lepob/ob mice through adiponectin-VEGF/VEGFR2 signaling
Source: PubMed Central journal article supplement (PMC11521822; doi:10.3389/fcvm.2024.1491971), 2024-10-16
Supplement: Datasheet1.pdf [file Datasheet1.pdf]

| name     | log2FoldChange | pvalue      | padj     |
|----------|----------------|-------------|----------|
| Adamts16 | 8.646050855    | 9.726469971 | 1.88E-10 |
| Car6     | 7.364049017    | 6.663745785 | 2.17E-07 |
| Chga     | 7.022039711    | 8.347740974 | 4.49E-09 |
| Msx3     | 6.857460522    | 5.168794672 | 6.78E-06 |
| Adipoq   | 6.598163104    | 7.288435136 | 5.15E-08 |
| Saa3     | 6.439098783    | 59.52957256 | 2.95E-60 |
| H2-M11   | 6.300930509    | 4.474994082 | 3.35E-05 |
| Col24a1  | 5.947883254    | 45.22230798 | 5.99E-46 |
| Col11a1  | 5.894696647    | 3.513973055 | 0.000306 |
| Gm14461  | 5.724080892    | 2.897637962 | 0.001266 |
| Arg1     | 5.61029182     | 20.78667311 | 1.63E-21 |
| Cfd      | 5.593932012    | 8.382180534 | 4.15E-09 |
| Bcat1    | 5.541331274    | 4.594264324 | 2.55E-05 |
| Tpsb2    | 5.49600252     | 13.91427747 | 1.22E-14 |
| Ecel1    | 5.466564403    | 4.988337244 | 1.03E-05 |
| Gabrb3   | 5.454211215    | 2.793568001 | 0.001609 |
| Pnoc     | 5.451712664    | 4.907172489 | 1.24E-05 |
| Clca2    | 5.41605499     | 18.10801803 | 7.80E-19 |
| Epyc     | 5.325028884    | 2.196240518 | 0.006364 |
| Mrgprb1  | 5.320283779    | 2.829611416 | 0.00148  |
| Vsig4    | 5.29822979     | 59.65450113 | 2.22E-60 |
| Cd5l     | 5.176515595    | 70.85982146 | 1.38E-71 |
| Pck1     | 4.967648553    | 8.145707509 | 7.15E-09 |
| Car3     | 4.945613544    | 17.79534676 | 1.60E-18 |
| Chl1     | 4.91903194     | 50.44699891 | 3.57E-51 |
| Ccl8     | 4.918820504    | 14.49625751 | 3.19E-15 |
| Dlk1     | 4.877144148    | 7.016917714 | 9.62E-08 |
| Prss35   | 4.80340054     | 41.46260277 | 3.45E-42 |
| Pdzrn4   | 4.685352213    | 2.226090334 | 0.005942 |
| H2-M9    | 4.626969454    | 7.080714923 | 8.30E-08 |
| Ccl24    | 4.57283086     | 14.11466503 | 7.68E-15 |
| Ucp1     | 4.572209088    | 7.418975926 | 3.81E-08 |
| Sez6l    | 4.514815208    | 18.47406703 | 3.36E-19 |
| Fam64a   | 4.483982047    | 42.93826803 | 1.15E-43 |
| Tph1     | 4.299232607    | 5.950915216 | 1.12E-06 |
| Lum      | 4.29299146     | 33.60643886 | 2.47E-34 |
| Cxcl5    | 4.213163944    | 14.18076816 | 6.60E-15 |
| Kcnt1    | 4.105679478    | 13.48397115 | 3.28E-14 |
| Tpsab1   | 4.06137062     | 2.720184821 | 0.001905 |
| Nxpe5    | 4.040341571    | 42.70454738 | 1.97E-43 |
| Ckap2    | 4.018107792    | 21.67708112 | 2.10E-22 |
| Mmp10    | 3.949517667    | 4.798779002 | 1.59E-05 |
| Col6a5   | 3.937512953    | 23.32489219 | 4.73E-24 |
| Pif1     | 3.932141854    | 32.2128056  | 6.13E-33 |
| Fabp7    | 3.906551561    | 10.40757346 | 3.91E-11 |
| Twist1   | 3.898350299    | 8.608259165 | 2.46E-09 |
| Angptl7  | 3.892811339    | 24.89026956 | 1.29E-25 |

|          |             |             |          |
|----------|-------------|-------------|----------|
| Troap    | 3.819718584 | 29.99476368 | 1.01E-30 |
| Ankle1   | 3.809777921 | 17.98938502 | 1.02E-18 |
| Fcna     | 3.801314547 | 41.58105747 | 2.62E-42 |
| lqgap3   | 3.779937408 | 16.30271552 | 4.98E-17 |
| Pbk      | 3.760074477 | 29.60376694 | 2.49E-30 |
| Cenpf    | 3.75676649  | 26.80382634 | 1.57E-27 |
| Lgals7   | 3.725863826 | 20.5159649  | 3.05E-21 |
| Fgf23    | 3.704737828 | 5.357729533 | 4.39E-06 |
| Adamts19 | 3.685480504 | 9.563537389 | 2.73E-10 |
| Etv4     | 3.683291722 | 10.43201601 | 3.70E-11 |
| Rph3a    | 3.627519417 | 2.891331445 | 0.001284 |
| Lrrc15   | 3.621956623 | 7.628099034 | 2.35E-08 |
| Krt14    | 3.604720425 | 35.66591903 | 2.16E-36 |
| Col6a6   | 3.592624805 | 8.144468119 | 7.17E-09 |
| Cma1     | 3.591970601 | 27.26910438 | 5.38E-28 |
| Srrm4    | 3.578842495 | 8.073292528 | 8.45E-09 |
| Thbs2    | 3.550906115 | 15.67702621 | 2.10E-16 |
| Gjb4     | 3.542531802 | 7.810366752 | 1.55E-08 |
| Ube2c    | 3.538845007 | 61.607501   | 2.47E-62 |
| Cdkn3    | 3.537958999 | 39.71925605 | 1.91E-40 |
| Mirg     | 3.513024306 | 5.531734568 | 2.94E-06 |
| Timp1    | 3.501027915 | 47.90437513 | 1.25E-48 |
| Cemip    | 3.499228047 | 7.978317712 | 1.05E-08 |
| Alpl2    | 3.494148615 | 2.202729282 | 0.00627  |
| Kif18b   | 3.493246626 | 15.700063   | 1.99E-16 |
| Ttk      | 3.479222828 | 63.61759983 | 2.41E-64 |
| Gjb5     | 3.470214037 | 9.231774812 | 5.86E-10 |
| Sapcd2   | 3.444397598 | 18.58021856 | 2.63E-19 |
| Prc1     | 3.420562129 | 23.22267811 | 5.99E-24 |
| Cep55    | 3.40664297  | 59.95055604 | 1.12E-60 |
| BC030867 | 3.393874796 | 8.061596158 | 8.68E-09 |
| Has2     | 3.363764912 | 9.035882767 | 9.21E-10 |
| Lin7a    | 3.33598005  | 4.111033791 | 7.74E-05 |
| Fhl5     | 3.305854799 | 3.079476906 | 0.000833 |
| Gprin1   | 3.300992523 | 2.150432429 | 0.007072 |
| Egr4     | 3.300920961 | 4.427107769 | 3.74E-05 |
| Vat1l    | 3.294648596 | 4.228376481 | 5.91E-05 |
| Nfasc    | 3.290873055 | 3.750091254 | 0.000178 |
| Cdk1     | 3.276843995 | 37.22024024 | 6.02E-38 |
| Wt1os    | 3.27120258  | 3.31953579  | 0.000479 |
| Hmmr     | 3.261357844 | 28.7593201  | 1.74E-29 |
| Cdc25c   | 3.257010959 | 10.46895745 | 3.40E-11 |
| Vit      | 3.240627754 | 6.721030028 | 1.90E-07 |
| Nuf2     | 3.237737173 | 17.41949827 | 3.81E-18 |
| Spag5    | 3.217905169 | 16.73636303 | 1.84E-17 |
| Sntg1    | 3.216315    | 2.194388703 | 0.006392 |
| Ccnb1    | 3.206194651 | 28.42603708 | 3.75E-29 |
| Clgn     | 3.205482878 | 3.762512414 | 0.000173 |

|               |             |             |          |
|---------------|-------------|-------------|----------|
| Depdc1a       | 3.192401441 | 49.20272968 | 6.27E-50 |
| Tpx2          | 3.175035334 | 28.91295091 | 1.22E-29 |
| Lrrn1         | 3.173281242 | 3.922028767 | 0.00012  |
| Ska1          | 3.171597508 | 14.93472985 | 1.16E-15 |
| Cxcl13        | 3.16206413  | 10.63344724 | 2.33E-11 |
| 4930558J18Rik | 3.158816262 | 3.926686128 | 0.000118 |
| Kifc1         | 3.147626537 | 32.15432028 | 7.01E-33 |
| Kntc1         | 3.134762328 | 19.68343473 | 2.07E-20 |
| Has2os        | 3.119598046 | 3.303912914 | 0.000497 |
| Kif22         | 3.090172862 | 17.33579035 | 4.62E-18 |
| Ckap2l        | 3.064202192 | 24.80192371 | 1.58E-25 |
| Melk          | 3.057951466 | 17.25933659 | 5.50E-18 |
| Plk1          | 3.05504288  | 18.39448387 | 4.03E-19 |
| Ccnb2         | 3.052538279 | 24.68607557 | 2.06E-25 |
| Fam83d        | 3.051289055 | 48.49571934 | 3.19E-49 |
| Cenpm         | 3.050714061 | 11.39477831 | 4.03E-12 |
| Cdc20         | 3.039133314 | 36.5673555  | 2.71E-37 |
| Calca         | 3.031558378 | 8.580406622 | 2.63E-09 |
| Aspm          | 2.997879568 | 15.83088989 | 1.48E-16 |
| Birc5         | 2.981846304 | 13.38558124 | 4.12E-14 |
| Kif2c         | 2.973458092 | 19.66481201 | 2.16E-20 |
| Zbtbd6        | 2.951486781 | 9.668146962 | 2.15E-10 |
| Anln          | 2.941373636 | 28.70433671 | 1.98E-29 |
| Top2a         | 2.932903037 | 17.29516115 | 5.07E-18 |
| Sifn9         | 2.932894081 | 54.03228157 | 9.28E-55 |
| Prr11         | 2.932300513 | 37.83541957 | 1.46E-38 |
| Cdca8         | 2.931739632 | 16.81837991 | 1.52E-17 |
| Knstrn        | 2.922675632 | 43.052358   | 8.86E-44 |
| Sgol2         | 2.921986345 | 70.64698509 | 2.25E-71 |
| Sgol1         | 2.915687156 | 43.65823807 | 2.20E-44 |
| Neil3         | 2.905755365 | 14.47834145 | 3.32E-15 |
| Mastl         | 2.896768127 | 30.48340154 | 3.29E-31 |
| Ska3          | 2.896040032 | 28.74730296 | 1.79E-29 |
| Stil          | 2.886650637 | 11.06629229 | 8.58E-12 |
| Cdca2         | 2.88552974  | 29.29683137 | 5.05E-30 |
| Calcb         | 2.88485176  | 14.92161318 | 1.20E-15 |
| Folr2         | 2.881605731 | 8.727338764 | 1.87E-09 |
| Aurkb         | 2.878187692 | 14.51068575 | 3.09E-15 |
| Col5a3        | 2.8769208   | 22.74165891 | 1.81E-23 |
| Xkr5          | 2.872358868 | 6.53338117  | 2.93E-07 |
| Bai2          | 2.864062352 | 9.378773535 | 4.18E-10 |
| Pmch          | 2.861179062 | 9.231774812 | 5.86E-10 |
| Esco2         | 2.859112634 | 33.94258198 | 1.14E-34 |
| Shcbp1        | 2.848789469 | 13.27419814 | 5.32E-14 |
| AF357359      | 2.841293009 | 3.074630735 | 0.000842 |
| Mtfr2         | 2.835141388 | 10.61083925 | 2.45E-11 |
| Parpbp        | 2.821017071 | 19.80908067 | 1.55E-20 |
| Tnc           | 2.82096034  | 39.67892455 | 2.09E-40 |

|               |             |             |          |
|---------------|-------------|-------------|----------|
| Mki67         | 2.815910772 | 12.88989063 | 1.29E-13 |
| Arhgef39      | 2.814920473 | 19.24755614 | 5.66E-20 |
| 4933413G19Rik | 2.814347304 | 7.807715965 | 1.56E-08 |
| Rpl39l        | 2.812887499 | 2.394090372 | 0.004036 |
| Cdhr1         | 2.80822425  | 2.555916179 | 0.00278  |
| Kif11         | 2.807454731 | 21.43070691 | 3.71E-22 |
| Meg3          | 2.806330471 | 22.732793   | 1.85E-23 |
| Cdca3         | 2.80581623  | 11.51147214 | 3.08E-12 |
| Cenpi         | 2.79925489  | 37.45167756 | 3.53E-38 |
| Scara3        | 2.787998807 | 7.062944367 | 8.65E-08 |
| Pappa2        | 2.784789008 | 3.87011793  | 0.000135 |
| Nusap1        | 2.784260544 | 24.41268194 | 3.87E-25 |
| Vmn2r26       | 2.784183119 | 2.714524621 | 0.00193  |
| Serpinb2      | 2.783908374 | 5.058990447 | 8.73E-06 |
| Cyp26a1       | 2.782335256 | 4.641967554 | 2.28E-05 |
| Dtl           | 2.77697278  | 41.56537293 | 2.72E-42 |
| Cyp1b1        | 2.776417204 | 27.57756336 | 2.65E-28 |
| Adamts4       | 2.773500136 | 13.20630862 | 6.22E-14 |
| Rbm44         | 2.770973346 | 4.594944674 | 2.54E-05 |
| Psrc1         | 2.769901954 | 8.386934941 | 4.10E-09 |
| Foxm1         | 2.769713333 | 13.21511626 | 6.09E-14 |
| Ccl7          | 2.765744486 | 28.74843632 | 1.78E-29 |
| Rad51ap1      | 2.764917818 | 36.00135414 | 9.97E-37 |
| Casc5         | 2.755084985 | 29.70281326 | 1.98E-30 |
| Lhx2          | 2.753367755 | 2.510911602 | 0.003084 |
| Gjb3          | 2.746501874 | 5.425839684 | 3.75E-06 |
| Olf15l2       | 2.732739623 | 3.860652843 | 0.000138 |
| Ocstamp       | 2.727734864 | 3.476548069 | 0.000334 |
| Rian          | 2.727434158 | 45.64560331 | 2.26E-46 |
| Cenpe         | 2.718338288 | 33.76117579 | 1.73E-34 |
| Hist1h1b      | 2.716666615 | 3.989076818 | 0.000103 |
| Cdca5         | 2.715456692 | 19.94243205 | 1.14E-20 |
| Mir147        | 2.702508185 | 16.40071052 | 3.97E-17 |
| Ect2          | 2.702263875 | 46.96836278 | 1.08E-47 |
| Clspn         | 2.698988415 | 7.66818247  | 2.15E-08 |
| Mir1906-2     | 2.690984574 | 11.46296322 | 3.44E-12 |
| Mir1906-1     | 2.690984574 | 11.46296322 | 3.44E-12 |
| Kif14         | 2.680148758 | 8.711620402 | 1.94E-09 |
| Clhc1         | 2.678279267 | 12.2162575  | 6.08E-13 |
| C1qc          | 2.677221092 | 20.83344401 | 1.47E-21 |
| Mis18bp1      | 2.669821039 | 20.08610622 | 8.20E-21 |
| Cilp2         | 2.663623399 | 2.323797485 | 0.004745 |
| Diap3         | 2.655112519 | 12.62411125 | 2.38E-13 |
| C1qb          | 2.652807893 | 18.01332841 | 9.70E-19 |
| Camk1g        | 2.650928065 | 2.740081765 | 0.001819 |
| Marco         | 2.644509623 | 13.53988719 | 2.88E-14 |
| Dlga5         | 2.640898974 | 16.85605736 | 1.39E-17 |
| Spc24         | 2.633764727 | 15.18587633 | 6.52E-16 |

|               |             |             |          |
|---------------|-------------|-------------|----------|
| Phf19         | 2.620638341 | 18.6951021  | 2.02E-19 |
| Mcpt4         | 2.618751893 | 4.119189209 | 7.6E-05  |
| E2f7          | 2.618709814 | 22.5571336  | 2.77E-23 |
| Cdh3          | 2.607361104 | 5.86392651  | 1.37E-06 |
| Cenph         | 2.60536509  | 5.74813222  | 1.79E-06 |
| Ebf2          | 2.600630872 | 4.530351405 | 2.95E-05 |
| Cxcl1         | 2.59768598  | 9.867020598 | 1.36E-10 |
| Gtse1         | 2.588869276 | 19.36914491 | 4.27E-20 |
| Bub1          | 2.586481286 | 26.71150705 | 1.94E-27 |
| Aurka         | 2.581661201 | 38.25811019 | 5.52E-39 |
| Ccnf          | 2.58006084  | 23.06220133 | 8.67E-24 |
| Dnph1         | 2.564632242 | 12.69144122 | 2.03E-13 |
| Oip5          | 2.563611254 | 31.57419036 | 2.67E-32 |
| Wt1           | 2.562292346 | 6.535596191 | 2.91E-07 |
| Lrr1          | 2.561842556 | 5.431845706 | 3.7E-06  |
| Ccna2         | 2.55645763  | 59.47711995 | 3.33E-60 |
| Gpr133        | 2.552731056 | 4.363797512 | 4.33E-05 |
| Rad51         | 2.54956794  | 29.79800705 | 1.59E-30 |
| Uhrf1         | 2.549334607 | 10.43522828 | 3.67E-11 |
| Ndc80         | 2.546943875 | 29.76299038 | 1.73E-30 |
| Cacna1g       | 2.538084466 | 5.824447066 | 1.5E-06  |
| Mir5134       | 2.537584687 | 3.668412815 | 0.000215 |
| Prrx2         | 2.535511256 | 10.91748162 | 1.21E-11 |
| Exo1          | 2.535424138 | 11.21831381 | 6.05E-12 |
| Cdc6          | 2.535392951 | 17.11619509 | 7.65E-18 |
| Nr1h4         | 2.534397249 | 3.658240806 | 0.00022  |
| C1qa          | 2.527782315 | 16.60002969 | 2.51E-17 |
| AA467197      | 2.523798956 | 11.02239387 | 9.50E-12 |
| Serpinf1      | 2.520435714 | 8.72302958  | 1.89E-09 |
| Racgap1       | 2.519964978 | 10.99409469 | 1.01E-11 |
| C330027C09Rik | 2.513043996 | 46.09330778 | 8.07E-47 |
| Dscc1         | 2.508573434 | 9.556669027 | 2.78E-10 |
| Vcan          | 2.504046761 | 18.221563   | 6.00E-19 |
| Ncapg         | 2.497541814 | 40.48781681 | 3.25E-41 |
| A2m           | 2.490615004 | 6.188195544 | 6.48E-07 |
| 4930427A07Rik | 2.489858317 | 13.94086428 | 1.15E-14 |
| Ccdc18        | 2.48662938  | 22.58589498 | 2.59E-23 |
| Cd109         | 2.482863637 | 14.51001955 | 3.09E-15 |
| Fignl1        | 2.481361309 | 45.90700381 | 1.24E-46 |
| Ccl12         | 2.474783472 | 12.39306882 | 4.05E-13 |
| C3ar1         | 2.462879805 | 13.72766295 | 1.87E-14 |
| H1fx          | 2.461081825 | 28.31461017 | 4.85E-29 |
| Gpr88         | 2.458510362 | 4.999402062 | 1E-05    |
| Msr1          | 2.451525909 | 8.318893465 | 4.80E-09 |
| 1190002F15Rik | 2.450931717 | 15.83953407 | 1.45E-16 |
| Cd163         | 2.440998259 | 8.739021042 | 1.82E-09 |
| Kifc5b        | 2.436385152 | 20.16612173 | 6.82E-21 |
| Capn6         | 2.43226166  | 11.99698212 | 1.01E-12 |

|               |             |             |          |
|---------------|-------------|-------------|----------|
| Rrm2          | 2.424345592 | 12.49164171 | 3.22E-13 |
| Depdc1b       | 2.423595103 | 16.61140812 | 2.45E-17 |
| Rmi2          | 2.422333708 | 13.27949902 | 5.25E-14 |
| Espl1         | 2.409186362 | 9.102799995 | 7.89E-10 |
| Kif15         | 2.400986183 | 14.38513574 | 4.12E-15 |
| Col1a1        | 2.400950374 | 16.27777693 | 5.28E-17 |
| 2810417H13Rik | 2.399397755 | 28.3570864  | 4.39E-29 |
| 2810408I11Rik | 2.397042536 | 2.555916179 | 0.00278  |
| Mrap          | 2.388381085 | 3.555936046 | 0.000278 |
| Plekhg4       | 2.386387831 | 13.17544534 | 6.68E-14 |
| Ms4a7         | 2.375838213 | 10.68930567 | 2.05E-11 |
| Prnd          | 2.369501865 | 6.697090504 | 2.01E-07 |
| Cst9          | 2.36900237  | 4.627730396 | 2.36E-05 |
| Zwilch        | 2.367268685 | 15.41564996 | 3.84E-16 |
| Ccne1         | 2.36155468  | 9.657674102 | 2.20E-10 |
| Lctl          | 2.359304304 | 9.413810164 | 3.86E-10 |
| Spdl1         | 2.358286977 | 24.39980245 | 3.98E-25 |
| Rad54b        | 2.357719661 | 18.999494   | 1.00E-19 |
| Col3a1        | 2.354803874 | 30.71356691 | 1.93E-31 |
| Brca1         | 2.350172566 | 11.50671667 | 3.11E-12 |
| Sdsl          | 2.336031412 | 3.404001232 | 0.000394 |
| 2700099C18Rik | 2.335919856 | 31.39743126 | 4.00E-32 |
| Pole          | 2.333163256 | 8.861617999 | 1.38E-09 |
| Gdf6          | 2.323025334 | 4.766294401 | 1.71E-05 |
| Ntrk1         | 2.316430883 | 4.385299022 | 4.12E-05 |
| Tacc3         | 2.315670531 | 8.135519141 | 7.32E-09 |
| Wfdc17        | 2.313006308 | 5.074847979 | 8.42E-06 |
| Steap4        | 2.304010779 | 6.83749097  | 1.45E-07 |
| P4ha3         | 2.303075178 | 14.39546343 | 4.02E-15 |
| Mcm10         | 2.302617346 | 9.554673183 | 2.79E-10 |
| Dock3         | 2.301098632 | 2.367279882 | 0.004293 |
| Fsbp          | 2.297168326 | 10.27515071 | 5.31E-11 |
| Trip13        | 2.296204708 | 20.75115423 | 1.77E-21 |
| Wisp1         | 2.292622848 | 17.4303651  | 3.71E-18 |
| Tk1           | 2.288819822 | 7.845402683 | 1.43E-08 |
| Adamts12      | 2.281112031 | 26.95523732 | 1.11E-27 |
| Fbn2          | 2.279938373 | 8.07472542  | 8.42E-09 |
| Ptx3          | 2.277357043 | 12.43719999 | 3.65E-13 |
| Cfb           | 2.271717007 | 2.871482308 | 0.001344 |
| Chek1         | 2.271155462 | 24.12974234 | 7.42E-25 |
| Cenpn         | 2.265190344 | 11.16156992 | 6.89E-12 |
| Lypd1         | 2.252576038 | 7.471632262 | 3.38E-08 |
| Slurp1        | 2.250553226 | 3.457929551 | 0.000348 |
| Spc25         | 2.245059168 | 55.14840694 | 7.11E-56 |
| Ogdhl         | 2.242392684 | 2.775584839 | 0.001677 |
| Nsl1          | 2.242041235 | 12.18575144 | 6.52E-13 |
| Folr1         | 2.238769091 | 2.62176196  | 0.002389 |
| Ube2t         | 2.236756182 | 18.10248911 | 7.90E-19 |

|         |             |             |          |
|---------|-------------|-------------|----------|
| E2f8    | 2.236640875 | 4.229334696 | 5.9E-05  |
| Has1    | 2.235286217 | 11.29828968 | 5.03E-12 |
| Cebpe   | 2.227094989 | 2.366149584 | 0.004304 |
| Vsig8   | 2.225120022 | 2.735592409 | 0.001838 |
| Gpr39   | 2.2241686   | 7.446910456 | 3.57E-08 |
| Ebf3    | 2.220661202 | 8.482416282 | 3.29E-09 |
| Ankrd55 | 2.216913176 | 5.824566538 | 1.5E-06  |
| Ildr2   | 2.216055504 | 4.715003878 | 1.93E-05 |
| Arsi    | 2.215391462 | 8.164014484 | 6.85E-09 |
| Fcrlb   | 2.207781362 | 6.018649399 | 9.58E-07 |
| Nek2    | 2.201923285 | 11.35546612 | 4.41E-12 |
| Mapk10  | 2.200532938 | 2.066804349 | 0.008574 |
| Scml2   | 2.197188587 | 12.17927692 | 6.62E-13 |
| Ccdc80  | 2.196656373 | 9.95706212  | 1.10E-10 |
| Mybl2   | 2.195095696 | 7.426754309 | 3.74E-08 |
| Kif20b  | 2.193626831 | 41.31586334 | 4.83E-42 |
| Dcn     | 2.178360057 | 4.400813273 | 3.97E-05 |
| Slitrk4 | 2.175233865 | 2.525188749 | 0.002984 |
| Smpd3   | 2.174174536 | 7.37913338  | 4.18E-08 |
| Plin1   | 2.173657949 | 3.666500164 | 0.000216 |
| Tnni1   | 2.157913864 | 2.133724651 | 0.00735  |
| Gpr84   | 2.156439228 | 2.783037889 | 0.001648 |
| Spsb4   | 2.14950078  | 5.92124509  | 1.2E-06  |
| Tcf19   | 2.14596835  | 12.25913937 | 5.51E-13 |
| Ncapg2  | 2.144857934 | 18.6511222  | 2.23E-19 |
| Aldh1a3 | 2.144045239 | 21.92957998 | 1.18E-22 |
| Pask    | 2.135836976 | 13.51194644 | 3.08E-14 |
| Kif23   | 2.132795791 | 10.99099049 | 1.02E-11 |
| Prtn3   | 2.131827537 | 11.71105055 | 1.95E-12 |
| Gatm    | 2.128864145 | 16.66257483 | 2.17E-17 |
| Rpp25   | 2.127762914 | 2.035587416 | 0.009213 |
| Mir6978 | 2.119801986 | 3.668490545 | 0.000215 |
| Orc1    | 2.11276046  | 6.669014349 | 2.14E-07 |
| Col1a2  | 2.107911545 | 25.43493349 | 3.67E-26 |
| Gfpt2   | 2.101047098 | 11.5054952  | 3.12E-12 |
| Cks1b   | 2.084923483 | 22.8116203  | 1.54E-23 |
| Cenpw   | 2.082074524 | 7.145376863 | 7.16E-08 |
| Apol7a  | 2.081254112 | 3.050814845 | 0.00089  |
| Adam12  | 2.080611757 | 25.67741702 | 2.10E-26 |
| Kif4    | 2.07945851  | 8.306216929 | 4.94E-09 |
| Fancd2  | 2.076274598 | 5.425839684 | 3.75E-06 |
| Apitd1  | 2.062260793 | 15.24110911 | 5.74E-16 |
| Kif20a  | 2.050497233 | 48.59740042 | 2.53E-49 |
| Col15a1 | 2.045147893 | 7.909251343 | 1.23E-08 |
| Eccc6l  | 2.040633215 | 9.776794365 | 1.67E-10 |
| Cenpp   | 2.037592362 | 17.21208589 | 6.14E-18 |
| Ptger3  | 2.033777462 | 13.85072051 | 1.41E-14 |
| Cdc45   | 2.029376767 | 12.65817146 | 2.20E-13 |

|         |             |             |          |
|---------|-------------|-------------|----------|
| Asf1b   | 2.017644252 | 7.765987017 | 1.71E-08 |
| Ncapd2  | 2.014741273 | 7.985382931 | 1.03E-08 |
| Chil4   | 2.013515315 | 4.268089111 | 5.39E-05 |
| Hells   | 2.012054637 | 37.62855462 | 2.35E-38 |
| Ccr5    | 2.010297227 | 29.73098887 | 1.86E-30 |
| Gen1    | 2.009327558 | 13.64866741 | 2.25E-14 |
| Lrrn2   | 2.002448563 | 32.06672363 | 8.58E-33 |
| Trem2   | 1.999542923 | 4.687991197 | 2.05E-05 |
| Insc    | 1.996060199 | 3.164219594 | 0.000685 |
| Gas2l3  | 1.99460208  | 6.991402249 | 1.02E-07 |
| C1qtnf6 | 1.989830443 | 43.58563861 | 2.60E-44 |
| Gal3st2 | 1.981065198 | 2.175309619 | 0.006679 |
| Sorcs1  | 1.96896601  | 3.120315805 | 0.000758 |
| Igdcc4  | 1.967443465 | 4.989504551 | 1.02E-05 |
| Prg4    | 1.967302575 | 12.19207435 | 6.43E-13 |
| Ticrr   | 1.965441557 | 5.56820749  | 2.7E-06  |
| Hapln1  | 1.962909031 | 2.867136864 | 0.001358 |
| Igf1    | 1.962683671 | 32.03111801 | 9.31E-33 |
| Lgi2    | 1.961289791 | 26.53092237 | 2.94E-27 |
| Fn1     | 1.957574309 | 8.157181346 | 6.96E-09 |
| Brinp1  | 1.953299048 | 5.192899176 | 6.41E-06 |
| Rgs5    | 1.951696658 | 38.9854848  | 1.03E-39 |
| Ptn     | 1.951094383 | 4.193734851 | 6.4E-05  |
| Gpr176  | 1.950310989 | 7.625692044 | 2.37E-08 |
| Trim59  | 1.947404184 | 69.61275603 | 2.44E-70 |
| H19     | 1.947115105 | 11.21349027 | 6.12E-12 |
| Chaf1b  | 1.938054473 | 6.551826252 | 2.81E-07 |
| Egln3   | 1.93056356  | 3.929840674 | 0.000118 |
| Ulbp1   | 1.929931419 | 9.970639658 | 1.07E-10 |
| Fcrls   | 1.926061095 | 7.154707224 | 7.00E-08 |
| Dctd    | 1.91375599  | 14.00293039 | 9.93E-15 |
| Cd276   | 1.912263676 | 6.09618066  | 8.01E-07 |
| Mir675  | 1.901134524 | 4.02498476  | 9.44E-05 |
| Olfml2b | 1.900123782 | 8.123881461 | 7.52E-09 |
| Bub1b   | 1.894156677 | 7.727824447 | 1.87E-08 |
| Fndc1   | 1.883061461 | 3.706265453 | 0.000197 |
| Gins2   | 1.876858057 | 9.600386167 | 2.51E-10 |
| Eln     | 1.874463617 | 79.99888178 | 1.00E-80 |
| Eno2    | 1.868311318 | 4.106242356 | 7.83E-05 |
| Pld5    | 1.867966195 | 6.814453978 | 1.53E-07 |
| Ccna1   | 1.865246815 | 3.020223604 | 0.000955 |
| Naip1   | 1.864989531 | 7.776263064 | 1.67E-08 |
| Gm5577  | 1.864071822 | 4.754070397 | 1.76E-05 |
| Col5a2  | 1.859346286 | 61.607501   | 2.47E-62 |
| Ak5     | 1.854141401 | 3.928575503 | 0.000118 |
| Cd248   | 1.852028951 | 4.992670349 | 1.02E-05 |
| Flnc    | 1.848242031 | 6.284137751 | 5.20E-07 |
| Agt     | 1.84633996  | 2.541227383 | 0.002876 |



|               |             |             |           |
|---------------|-------------|-------------|-----------|
| Cpxm1         | 1.829151763 | 3.83147933  | 0.000147  |
| Tubb3         | 1.825398813 | 4.088260216 | 8.16E-05  |
| Gria2         | 1.82390365  | 7.513051247 | 3.07E-08  |
| Retnla        | 1.820754198 | 8.670497016 | 2.14E-09  |
| 2010107G12Rik | 1.81923116  | 2.38464236  | 0.004124  |
| Crmp1         | 1.817301321 | 4.756025535 | 1.75E-05  |
| Npl           | 1.810656651 | 10.11589877 | 7.66E-11  |
| Psat1         | 1.80895795  | 13.78031813 | 1.66E-14  |
| Cdkn2c        | 1.808736956 | 112.7656616 | 1.72E-113 |
| Ephb2         | 1.798450235 | 4.105261436 | 7.85E-05  |
| Enpp3         | 1.797542698 | 19.56819097 | 2.70E-20  |
| Chtf18        | 1.795091061 | 7.174044599 | 6.70E-08  |
| Col5a1        | 1.793810973 | 20.47411855 | 3.36E-21  |
| 1500015O10Rik | 1.791759616 | 2.389789688 | 0.004076  |
| Mcm5          | 1.791437647 | 12.79023884 | 1.62E-13  |
| Mmp23         | 1.786124891 | 10.72185203 | 1.90E-11  |
| Wasf1         | 1.784664688 | 7.996469095 | 1.01E-08  |
| Tenm3         | 1.769241826 | 2.547613853 | 0.002834  |
| Cenpa         | 1.76539153  | 17.1617624  | 6.89E-18  |
| Raet1d        | 1.761483121 | 4.376261555 | 4.2E-05   |
| Brip1         | 1.759271056 | 14.71734087 | 1.92E-15  |
| Polq          | 1.746107518 | 5.266234967 | 5.42E-06  |
| F2rl3         | 1.744330932 | 6.94195119  | 1.14E-07  |
| Ccl2          | 1.743754048 | 28.28343063 | 5.21E-29  |
| Rhou          | 1.722859777 | 14.83058657 | 1.48E-15  |
| G530011O06Rik | 1.719126311 | 9.35521081  | 4.41E-10  |
| Ddias         | 1.715465522 | 13.28340979 | 5.21E-14  |
| Chaf1a        | 1.714779013 | 8.513167081 | 3.07E-09  |
| Smc2          | 1.714107208 | 26.02062987 | 9.54E-27  |
| Vash2         | 1.713553041 | 7.113376299 | 7.70E-08  |
| Traip         | 1.706438732 | 3.69065897  | 0.000204  |
| Inhba         | 1.704757479 | 4.902650694 | 1.25E-05  |
| Prr15         | 1.70455212  | 3.776381533 | 0.000167  |
| Mest          | 1.703947571 | 7.339772995 | 4.57E-08  |
| Padi4         | 1.70166603  | 3.481011963 | 0.00033   |
| Tbx18         | 1.695197365 | 2.446261873 | 0.003579  |
| Mmp14         | 1.685018468 | 31.40779043 | 3.91E-32  |
| Mcm2          | 1.678427539 | 17.24114343 | 5.74E-18  |
| Gmnn          | 1.670937049 | 39.05116114 | 8.89E-40  |
| Ccl9          | 1.668695307 | 4.201114882 | 6.29E-05  |
| Sox8          | 1.663915396 | 2.249951935 | 0.005624  |
| Fam132b       | 1.655213252 | 3.702976489 | 0.000198  |
| Bean1         | 1.646423998 | 3.402122265 | 0.000396  |
| Fbln2         | 1.645100602 | 8.940078965 | 1.15E-09  |
| Ccl11         | 1.642443438 | 2.360523713 | 0.00436   |
| Rarres1       | 1.639510755 | 5.446331301 | 3.58E-06  |
| Tyms          | 1.638683451 | 16.26727431 | 5.40E-17  |
| Bard1         | 1.635504307 | 7.886036414 | 1.30E-08  |

|               |             |             |          |
|---------------|-------------|-------------|----------|
| Nfe2l3        | 1.623636079 | 3.446760363 | 0.000357 |
| Pycr1         | 1.6218101   | 4.87008221  | 1.35E-05 |
| Dmkn          | 1.618895692 | 4.117946423 | 7.62E-05 |
| Aspn          | 1.617468604 | 5.454316193 | 3.51E-06 |
| Mad2l1        | 1.616560818 | 32.91947538 | 1.20E-33 |
| Shc4          | 1.615723593 | 3.927972684 | 0.000118 |
| Cdc7          | 1.615653845 | 20.23171236 | 5.87E-21 |
| Mmp13         | 1.615249905 | 13.72949152 | 1.86E-14 |
| Adamts2       | 1.61444027  | 20.05805999 | 8.75E-21 |
| Dpf1          | 1.613229429 | 2.358343445 | 0.004382 |
| Fam20c        | 1.606257394 | 11.3258573  | 4.72E-12 |
| Ephb1         | 1.601451246 | 3.24850248  | 0.000564 |
| Cenpq         | 1.600037785 | 22.54522235 | 2.85E-23 |
| Lmnb1         | 1.598559409 | 6.877624691 | 1.33E-07 |
| Lama1         | 1.595653297 | 7.436949462 | 3.66E-08 |
| Nodal         | 1.585294545 | 2.083132466 | 0.008258 |
| Mms22l        | 1.580009358 | 12.63463256 | 2.32E-13 |
| Incenp        | 1.579796759 | 9.448097095 | 3.56E-10 |
| Mybl1         | 1.578063375 | 8.07472542  | 8.42E-09 |
| Gins1         | 1.565861731 | 7.263897322 | 5.45E-08 |
| Fscn1         | 1.563887372 | 22.10331458 | 7.88E-23 |
| Ndr4          | 1.555218771 | 6.920393899 | 1.20E-07 |
| Lmnb2         | 1.551167051 | 25.2780722  | 5.27E-26 |
| 4930579G24Rik | 1.54934547  | 19.50841692 | 3.10E-20 |
| Clec11a       | 1.549032978 | 7.659523983 | 2.19E-08 |
| Myrf          | 1.549005284 | 3.513960785 | 0.000306 |
| Tmem108       | 1.545038106 | 2.563216411 | 0.002734 |
| Mlxipl        | 1.536101181 | 7.075217857 | 8.41E-08 |
| Cfi           | 1.536096972 | 3.035431566 | 0.000922 |
| Rgs16         | 1.533796765 | 8.329220447 | 4.69E-09 |
| Spon2         | 1.528927405 | 2.747186169 | 0.00179  |
| Gxylt2        | 1.520089979 | 5.937048437 | 1.16E-06 |
| Plk4          | 1.519754662 | 22.34924069 | 4.47E-23 |
| Greb1l        | 1.511113964 | 2.093229962 | 0.008068 |
| Tnfaip6       | 1.507640366 | 7.750328153 | 1.78E-08 |
| Arhgap11a     | 1.505429949 | 6.057354296 | 8.76E-07 |
| Pappa         | 1.498321049 | 5.698158796 | 2E-06    |
| Mmp2          | 1.49689546  | 16.50128536 | 3.15E-17 |
| Cit           | 1.494370743 | 5.858390749 | 1.39E-06 |
| Alox15        | 1.493798765 | 3.709802188 | 0.000195 |
| Mdk           | 1.491054512 | 21.8272829  | 1.49E-22 |
| Lgals1        | 1.489581019 | 10.56326869 | 2.73E-11 |
| Ctsk          | 1.481212797 | 2.068680226 | 0.008537 |
| Loxl2         | 1.480385128 | 26.21352011 | 6.12E-27 |
| Col6a4        | 1.474572613 | 4.382858736 | 4.14E-05 |
| Hmgb2         | 1.469032714 | 11.18749747 | 6.49E-12 |
| Tubb6         | 1.468868431 | 4.633562658 | 2.33E-05 |
| Vwa1          | 1.46885984  | 20.23171236 | 5.87E-21 |

|               |             |             |          |
|---------------|-------------|-------------|----------|
| Ccsap         | 1.467229618 | 17.94422777 | 1.14E-18 |
| Cks2          | 1.467161165 | 3.306952588 | 0.000493 |
| Aldh1l2       | 1.464780407 | 8.416350635 | 3.83E-09 |
| Cenpk         | 1.464716106 | 12.14515996 | 7.16E-13 |
| Pla1a         | 1.464068982 | 6.352720784 | 4.44E-07 |
| Rad54l        | 1.461386347 | 7.481590821 | 3.30E-08 |
| Fstl1         | 1.460534015 | 45.78867874 | 1.63E-46 |
| Pidd1         | 1.459718366 | 7.048204905 | 8.95E-08 |
| Mxd3          | 1.459499046 | 9.661020498 | 2.18E-10 |
| Fam167b       | 1.458199685 | 4.851233515 | 1.41E-05 |
| Zbtb7c        | 1.458039332 | 4.070744627 | 8.5E-05  |
| Efna5         | 1.457624939 | 9.811788919 | 1.54E-10 |
| Nrcam         | 1.456392268 | 6.590559772 | 2.57E-07 |
| Kcp           | 1.456160748 | 3.43650043  | 0.000366 |
| Car13         | 1.4545875   | 4.12079518  | 7.57E-05 |
| Gsg2          | 1.45268426  | 7.581870475 | 2.62E-08 |
| Kcnd1         | 1.452613228 | 2.831889527 | 0.001473 |
| Kpna2         | 1.452087055 | 25.44054366 | 3.63E-26 |
| Rad51c        | 1.451674878 | 9.662521377 | 2.18E-10 |
| Ror2          | 1.446072934 | 9.329942298 | 4.68E-10 |
| E2f1          | 1.440200564 | 7.388561473 | 4.09E-08 |
| Col6a2        | 1.431572843 | 17.88169872 | 1.31E-18 |
| Spp1          | 1.429008823 | 10.37063183 | 4.26E-11 |
| Fbxo5         | 1.427908224 | 35.47340547 | 3.36E-36 |
| Mfap5         | 1.426336907 | 16.57838669 | 2.64E-17 |
| Ccr3          | 1.426241293 | 2.388987896 | 0.004083 |
| Ung           | 1.42093937  | 3.4112345   | 0.000388 |
| D430020J02Rik | 1.419951175 | 6.272679988 | 5.34E-07 |
| Bora          | 1.415419965 | 13.00784801 | 9.82E-14 |
| Dhfr          | 1.414211785 | 17.48039781 | 3.31E-18 |
| Mir6950       | 1.413712656 | 6.866883635 | 1.36E-07 |
| Ackr1         | 1.407052904 | 5.126917894 | 7.47E-06 |
| Hcn1          | 1.40410112  | 2.333002564 | 0.004645 |
| H2afx         | 1.403200278 | 33.38862092 | 4.09E-34 |
| 2610524H06Rik | 1.399022653 | 5.94665221  | 1.13E-06 |
| Gpr64         | 1.39762737  | 17.63570414 | 2.31E-18 |
| Adamts7       | 1.393107196 | 13.05866475 | 8.74E-14 |
| Efcab11       | 1.389173657 | 4.203212301 | 6.26E-05 |
| Cadm4         | 1.385162614 | 10.80070417 | 1.58E-11 |
| Dbf4          | 1.381611664 | 12.33969063 | 4.57E-13 |
| Shisa4        | 1.379991426 | 13.07967417 | 8.32E-14 |
| Cercam        | 1.373441581 | 2.522128903 | 0.003005 |
| Dsn1          | 1.372993832 | 20.23171236 | 5.87E-21 |
| Nme4          | 1.370033194 | 4.149888146 | 7.08E-05 |
| Slc9a5        | 1.36479441  | 10.15997273 | 6.92E-11 |
| Ear6          | 1.364552652 | 2.844855195 | 0.001429 |
| Tesc          | 1.359908147 | 2.823945027 | 0.0015   |
| Ms4a6d        | 1.355418182 | 5.31684014  | 4.82E-06 |

|               |             |             |          |
|---------------|-------------|-------------|----------|
| Clip3         | 1.352257466 | 3.463226552 | 0.000344 |
| B4galt6       | 1.350328491 | 15.99252179 | 1.02E-16 |
| Plek2         | 1.343769158 | 3.43650043  | 0.000366 |
| Lig1          | 1.341584603 | 6.421315946 | 3.79E-07 |
| Tuba1c        | 1.336516099 | 2.740081765 | 0.001819 |
| Dbn1          | 1.334871238 | 48.50694714 | 3.11E-49 |
| Cxcl3         | 1.334676709 | 5.062803437 | 8.65E-06 |
| Bok           | 1.333723006 | 32.90267313 | 1.25E-33 |
| Adra2a        | 1.332069795 | 2.265360291 | 0.005428 |
| Gm13293       | 1.32685684  | 2.128876859 | 0.007432 |
| Wnt4          | 1.31984905  | 31.67065707 | 2.13E-32 |
| Hpgds         | 1.316946853 | 2.101046508 | 0.007924 |
| Add2          | 1.313145245 | 2.022914978 | 0.009486 |
| Rnf128        | 1.312658794 | 5.399515792 | 3.99E-06 |
| Steap1        | 1.311618062 | 2.365453609 | 0.004311 |
| Hmox1         | 1.304868492 | 5.482805438 | 3.29E-06 |
| Skp2          | 1.30410056  | 9.476823116 | 3.34E-10 |
| Abcb1b        | 1.301818238 | 4.678062579 | 2.1E-05  |
| Mybpc2        | 1.301240646 | 6.179668145 | 6.61E-07 |
| Kif18a        | 1.300785957 | 11.44234548 | 3.61E-12 |
| Wdhd1         | 1.30010724  | 4.766912295 | 1.71E-05 |
| Cenpl         | 1.298341175 | 12.32888691 | 4.69E-13 |
| Atad2         | 1.297466725 | 9.819665986 | 1.51E-10 |
| Ncaph         | 1.295370736 | 11.43424674 | 3.68E-12 |
| Col18a1       | 1.294016053 | 11.37792085 | 4.19E-12 |
| Flrt2         | 1.287576026 | 4.612585288 | 2.44E-05 |
| 2810408A11Rik | 1.282566902 | 4.605432977 | 2.48E-05 |
| Cdt1          | 1.282529198 | 2.61762972  | 0.002412 |
| Chek2         | 1.281648384 | 11.38060976 | 4.16E-12 |
| Ear7          | 1.280463555 | 2.324459456 | 0.004737 |
| Mmp19         | 1.279193298 | 12.5515093  | 2.81E-13 |
| Gas1          | 1.277411358 | 4.077971775 | 8.36E-05 |
| Rcc1          | 1.276717277 | 10.20883256 | 6.18E-11 |
| Mex3a         | 1.276419045 | 6.992038472 | 1.02E-07 |
| Zgrf1         | 1.274421884 | 3.959862565 | 0.00011  |
| Fen1          | 1.270249924 | 14.38513574 | 4.12E-15 |
| Fbn1          | 1.267362849 | 5.298892999 | 5.02E-06 |
| Shc2          | 1.265724326 | 5.382988878 | 4.14E-06 |
| 5730559C18Rik | 1.265256528 | 2.731350514 | 0.001856 |
| Wfdc21        | 1.264489179 | 3.70839639  | 0.000196 |
| Osr1          | 1.262476351 | 14.64951423 | 2.24E-15 |
| Efna4         | 1.260811567 | 3.282462962 | 0.000522 |
| Nnmt          | 1.257564539 | 3.654018708 | 0.000222 |
| Wnt5a         | 1.247929889 | 7.519235619 | 3.03E-08 |
| Tube1         | 1.247360494 | 3.793358229 | 0.000161 |
| Ezh2          | 1.246683482 | 19.33011499 | 4.68E-20 |
| Ccdc34        | 1.2398245   | 16.89114403 | 1.28E-17 |
| Tonsl         | 1.238537102 | 9.634922759 | 2.32E-10 |

|               |             |             |          |
|---------------|-------------|-------------|----------|
| Sparc         | 1.234017183 | 7.564800967 | 2.72E-08 |
| Mfap4         | 1.231208638 | 3.932081469 | 0.000117 |
| Rrm1          | 1.230204511 | 9.262199194 | 5.47E-10 |
| Fam110c       | 1.227705033 | 2.753616876 | 0.001764 |
| 2700094K13Rik | 1.226585464 | 19.61185999 | 2.44E-20 |
| Nhs           | 1.22239965  | 5.321492502 | 4.77E-06 |
| Scamp5        | 1.221580532 | 3.331442017 | 0.000466 |
| Kdelr3        | 1.218545028 | 8.716247275 | 1.92E-09 |
| Cfp           | 1.215213274 | 5.253640011 | 5.58E-06 |
| Apoe          | 1.211784988 | 10.99282134 | 1.02E-11 |
| Arhgap19      | 1.211431164 | 6.964440738 | 1.09E-07 |
| Pmf1          | 1.207359752 | 6.689554334 | 2.04E-07 |
| Tubb2b        | 1.20568321  | 21.30531    | 4.95E-22 |
| Nid2          | 1.20500549  | 5.582212258 | 2.62E-06 |
| Col16a1       | 1.201726826 | 35.56815913 | 2.70E-36 |
| Ccne2         | 1.199478428 | 19.45864028 | 3.48E-20 |
| Mpp6          | 1.197461774 | 3.279690937 | 0.000525 |
| Clca5         | 1.192674185 | 2.563265823 | 0.002734 |
| Sdk1          | 1.186514161 | 11.11996466 | 7.59E-12 |
| Mcm8          | 1.185272383 | 8.612669606 | 2.44E-09 |
| C1s1          | 1.181704936 | 2.891661036 | 0.001283 |
| Col6a1        | 1.181391377 | 12.39279495 | 4.05E-13 |
| Spag4         | 1.180433724 | 2.114720945 | 0.007679 |
| Tnfaip8l1     | 1.170059581 | 13.7919319  | 1.61E-14 |
| Mcm3          | 1.168182903 | 11.98819222 | 1.03E-12 |
| Dut           | 1.16667213  | 24.23739098 | 5.79E-25 |
| Abat          | 1.165996917 | 2.021891961 | 0.009508 |
| Cdca7         | 1.163739363 | 10.37720716 | 4.20E-11 |
| Pf4           | 1.160461121 | 9.508179307 | 3.10E-10 |
| Dclk1         | 1.15950876  | 12.69946493 | 2.00E-13 |
| Adamts3       | 1.158199217 | 4.893500232 | 1.28E-05 |
| Hmgb3         | 1.156852788 | 14.26038354 | 5.49E-15 |
| Blm           | 1.155751759 | 3.091798271 | 0.000809 |
| Reep2         | 1.155604838 | 4.256770263 | 5.54E-05 |
| Lhfp12        | 1.147927462 | 6.128403913 | 7.44E-07 |
| Lrrn4cl       | 1.147013991 | 4.184221201 | 6.54E-05 |
| Prim1         | 1.145700976 | 15.25706651 | 5.53E-16 |
| Itih5         | 1.144281163 | 5.077309159 | 8.37E-06 |
| Brca2         | 1.141715722 | 3.259718269 | 0.00055  |
| Wee1          | 1.140199561 | 16.70997661 | 1.95E-17 |
| Basp1         | 1.138719089 | 7.424967951 | 3.76E-08 |
| Cntrob        | 1.137852864 | 11.79510569 | 1.60E-12 |
| Cthrc1        | 1.134193399 | 4.65055163  | 2.24E-05 |
| Mcm6          | 1.132204031 | 19.6183966  | 2.41E-20 |
| Mrgprf        | 1.129060383 | 2.365453609 | 0.004311 |
| Tro           | 1.12742728  | 4.850161475 | 1.41E-05 |
| Uchl1         | 1.125791643 | 10.14060764 | 7.23E-11 |
| Adamts12      | 1.125471346 | 2.650563678 | 0.002236 |

|           |             |             |          |
|-----------|-------------|-------------|----------|
| Ncam1     | 1.118457147 | 7.062944367 | 8.65E-08 |
| Rfc4      | 1.117949527 | 17.83219313 | 1.47E-18 |
| Cdh2      | 1.117217952 | 14.82187641 | 1.51E-15 |
| Pde10a    | 1.116272906 | 4.732891018 | 1.85E-05 |
| Gm1976    | 1.115092721 | 2.982472827 | 0.001041 |
| Ska2      | 1.10931416  | 12.26360684 | 5.45E-13 |
| Cdh24     | 1.109185957 | 4.09305865  | 8.07E-05 |
| Tmc7      | 1.108747108 | 6.424341766 | 3.76E-07 |
| Ranbp17   | 1.107276528 | 2.013221692 | 0.0097   |
| Zfpm2     | 1.10489161  | 8.164014484 | 6.85E-09 |
| Fkbp10    | 1.104027823 | 27.44115448 | 3.62E-28 |
| Serpina3i | 1.103880413 | 2.178152272 | 0.006635 |
| Pole2     | 1.102586908 | 14.75193109 | 1.77E-15 |
| Mcm7      | 1.09815637  | 9.101912901 | 7.91E-10 |
| Spsb1     | 1.097594704 | 14.51068575 | 3.09E-15 |
| Loxl1     | 1.095888736 | 23.95211417 | 1.12E-24 |
| Fabp4     | 1.095676157 | 14.92161318 | 1.20E-15 |
| Raet1b    | 1.08826977  | 3.145145394 | 0.000716 |
| Tgm1      | 1.085386571 | 6.027932217 | 9.38E-07 |
| Zranb3    | 1.081027905 | 4.848812387 | 1.42E-05 |
| Slc26a4   | 1.074005438 | 2.611531883 | 0.002446 |
| Sox9      | 1.073550396 | 3.660026994 | 0.000219 |
| Tpbg      | 1.07315415  | 5.136518881 | 7.3E-06  |
| Pdlim4    | 1.070421499 | 2.830281846 | 0.001478 |
| Pola1     | 1.067293351 | 6.654475563 | 2.22E-07 |
| Prn       | 1.064089979 | 6.428627917 | 3.73E-07 |
| Pkmyt1    | 1.059970679 | 5.671474258 | 2.13E-06 |
| Tubb5     | 1.05755595  | 11.19325542 | 6.41E-12 |
| Lingo1    | 1.054615754 | 3.218567149 | 0.000605 |
| Map3k7cl  | 1.05289253  | 2.968701279 | 0.001075 |
| Zfp367    | 1.050960318 | 4.837975003 | 1.45E-05 |
| Hn1l      | 1.049547678 | 10.81337587 | 1.54E-11 |
| Tmem26    | 1.034088867 | 2.268502551 | 0.005389 |
| AI506816  | 1.033161497 | 2.537058472 | 0.002904 |
| Atad5     | 1.030647044 | 5.485456752 | 3.27E-06 |
| Foxd2os   | 1.028483307 | 5.126564255 | 7.47E-06 |
| Bdkrb1    | 1.027165979 | 2.00083002  | 0.009981 |
| Slc29a4   | 1.025295182 | 5.74813222  | 1.79E-06 |
| Dok2      | 1.02386598  | 5.151613497 | 7.05E-06 |
| Chil3     | 1.022066059 | 2.385933309 | 0.004112 |
| Col6a3    | 1.021327358 | 5.156020251 | 6.98E-06 |
| Adamts17  | 1.020449066 | 2.703326654 | 0.00198  |
| Pyroxd2   | 1.015491029 | 2.507135318 | 0.003111 |
| Aoc3      | 1.013220245 | 3.157364467 | 0.000696 |
| Mst1r     | 1.011781444 | 2.252178507 | 0.005595 |
| Cchcr1    | 1.010874208 | 6.329078989 | 4.69E-07 |
| Procr     | 1.007286084 | 8.348864439 | 4.48E-09 |
| Sertad4   | 1.007136657 | 3.764100528 | 0.000172 |

|               |              |             |          |
|---------------|--------------|-------------|----------|
| Rab3il1       | 1.004612895  | 28.83690771 | 1.46E-29 |
| Ndc1          | 1.004556256  | 6.23932829  | 5.76E-07 |
| Stmn1         | 1.004149061  | 12.98089091 | 1.04E-13 |
| Ckap4         | 1.00148935   | 29.85988104 | 1.38E-30 |
| Ube2s         | 1.001211669  | 9.669497399 | 2.14E-10 |
| Fcgr2b        | 1.000251169  | 3.872178775 | 0.000134 |
| Fabp1         | -1.002648926 | 11.10866768 | 7.79E-12 |
| Ryr2          | -1.004859525 | 2.188314048 | 0.006482 |
| Cxcr5         | -1.005853332 | 5.108716007 | 7.79E-06 |
| H2-Eb2        | -1.011719912 | 3.165243519 | 0.000684 |
| Myo5c         | -1.011916021 | 4.913764293 | 1.22E-05 |
| Pgr           | -1.01330534  | 6.397234087 | 4.01E-07 |
| Ttc25         | -1.015527322 | 2.205887816 | 0.006225 |
| Liph          | -1.017550731 | 2.778781038 | 0.001664 |
| Dlec1         | -1.01968142  | 2.201538044 | 0.006287 |
| Fam154b       | -1.021048451 | 6.127823152 | 7.45E-07 |
| Fam71f2       | -1.023041019 | 8.739021042 | 1.82E-09 |
| Ccdc37        | -1.024128117 | 3.534007839 | 0.000292 |
| Cbx7          | -1.026900396 | 9.00218403  | 9.95E-10 |
| Slc44a4       | -1.02746174  | 2.672290512 | 0.002127 |
| Rsph1         | -1.027488855 | 3.186356331 | 0.000651 |
| Klhl38        | -1.027805401 | 2.073886854 | 0.008436 |
| Lrrc48        | -1.029225432 | 3.133313959 | 0.000736 |
| Errfi1        | -1.030384934 | 59.85818359 | 1.39E-60 |
| Kcnj13        | -1.031005542 | 3.250189155 | 0.000562 |
| Nr3c2         | -1.036720944 | 14.55040173 | 2.82E-15 |
| Trp73         | -1.040549482 | 2.784145217 | 0.001644 |
| Fam92b        | -1.043839364 | 2.096879471 | 0.008001 |
| Ccdc121       | -1.045270787 | 2.823940594 | 0.0015   |
| Fank1         | -1.045344174 | 2.355627758 | 0.004409 |
| Acaa1b        | -1.045533818 | 10.94433697 | 1.14E-11 |
| Sntb1         | -1.04708144  | 14.86810735 | 1.35E-15 |
| Enkur         | -1.047983614 | 2.945838201 | 0.001133 |
| Dnali1        | -1.054901945 | 2.97828024  | 0.001051 |
| 2410004P03Rik | -1.055290981 | 2.718711458 | 0.001911 |
| Scn4a         | -1.057355954 | 3.097170832 | 0.0008   |
| Kcnk2         | -1.057651834 | 4.675492975 | 2.11E-05 |
| Cdkl4         | -1.060573825 | 4.132171106 | 7.38E-05 |
| Aox3          | -1.060677256 | 4.126538839 | 7.47E-05 |
| Armc3         | -1.062604277 | 2.62439069  | 0.002375 |
| Gm8369        | -1.062942863 | 2.216648474 | 0.006072 |
| Foxj1         | -1.065611362 | 10.5577639  | 2.77E-11 |
| Bspry         | -1.068805031 | 5.056739559 | 8.78E-06 |
| Zmynd10       | -1.075397246 | 3.558313164 | 0.000276 |
| Wdr16         | -1.076343104 | 2.363796969 | 0.004327 |
| Ccdc30        | -1.079837656 | 4.335226332 | 4.62E-05 |
| Nyx           | -1.081204949 | 3.030063401 | 0.000933 |
| Gbp10         | -1.081946118 | 3.862456165 | 0.000137 |

|               |              |             |          |
|---------------|--------------|-------------|----------|
| Ccdc170       | -1.087352683 | 4.560336628 | 2.75E-05 |
| Wfdc8         | -1.088633512 | 2.429122975 | 0.003723 |
| Osbp16        | -1.089679961 | 3.842838431 | 0.000144 |
| BC051019      | -1.091970237 | 2.13866756  | 0.007267 |
| Maats1        | -1.09470455  | 5.901499603 | 1.25E-06 |
| Dixdc1        | -1.094744722 | 11.45338802 | 3.52E-12 |
| Tcp11         | -1.096706268 | 4.672952515 | 2.12E-05 |
| Wdr63         | -1.098881843 | 3.067189464 | 0.000857 |
| Hc            | -1.102371222 | 6.117328781 | 7.63E-07 |
| Tspan1        | -1.104667569 | 4.649213921 | 2.24E-05 |
| Mycbpap       | -1.107007925 | 4.533533879 | 2.93E-05 |
| Tsnaxip1      | -1.108532026 | 3.764489185 | 0.000172 |
| Ankrd45       | -1.108532456 | 2.675288301 | 0.002112 |
| Srcin1        | -1.115516859 | 3.360866607 | 0.000436 |
| 4930562C15Rik | -1.121389718 | 4.933446226 | 1.17E-05 |
| Erich2        | -1.121549736 | 4.220995052 | 6.01E-05 |
| Armc2         | -1.122179233 | 2.409370842 | 0.003896 |
| Ppil6         | -1.123839669 | 2.821264433 | 0.001509 |
| Spag6         | -1.127043904 | 6.685332799 | 2.06E-07 |
| Dnah10        | -1.127208556 | 2.656372881 | 0.002206 |
| lqub          | -1.127455988 | 2.816380876 | 0.001526 |
| Cacna1i       | -1.129503863 | 5.523018889 | 3E-06    |
| Gabrp         | -1.131142717 | 4.006361779 | 9.85E-05 |
| Scgb3a2       | -1.131189154 | 4.414136376 | 3.85E-05 |
| Nme5          | -1.132203965 | 3.50349623  | 0.000314 |
| Dynlrb2       | -1.135555709 | 6.375497387 | 4.21E-07 |
| Cyp4b1        | -1.13618939  | 6.352458444 | 4.44E-07 |
| Fmo1          | -1.136226105 | 8.964465056 | 1.09E-09 |
| 8430408G22Rik | -1.137478465 | 19.49623228 | 3.19E-20 |
| Atp6v1c2      | -1.138469046 | 3.648351309 | 0.000225 |
| 4-Mar         | -1.144590674 | 2.810240369 | 0.001548 |
| Gfra1         | -1.146263102 | 3.04444346  | 0.000903 |
| Vpreb3        | -1.147917957 | 6.881041837 | 1.32E-07 |
| Ccr9          | -1.148564373 | 2.633415273 | 0.002326 |
| Ccdc108       | -1.14936831  | 3.11976066  | 0.000759 |
| Gpx2          | -1.151591153 | 2.411659874 | 0.003876 |
| Tekt1         | -1.152118137 | 2.835737848 | 0.00146  |
| 1700007K13Rik | -1.152292543 | 9.055017358 | 8.81E-10 |
| 1700024G13Rik | -1.158842476 | 2.51894861  | 0.003027 |
| Syt5          | -1.160047557 | 2.378308783 | 0.004185 |
| Wdr93         | -1.165964005 | 2.738983703 | 0.001824 |
| Pifo          | -1.167017066 | 2.60985878  | 0.002456 |
| Ubxn10        | -1.170939662 | 3.586397213 | 0.000259 |
| 1700009P17Rik | -1.174472804 | 2.159320975 | 0.006929 |
| 1700028P14Rik | -1.181388434 | 2.096473538 | 0.008008 |
| Acer2         | -1.182746481 | 2.913029533 | 0.001222 |
| Sec14l4       | -1.183614614 | 2.845869413 | 0.001426 |
| A830018L16Rik | -1.185596625 | 2.968263659 | 0.001076 |



|               |              |             |          |
|---------------|--------------|-------------|----------|
| Ccdc146       | -1.185855001 | 3.465695279 | 0.000342 |
| Ppargc1a      | -1.187127581 | 4.067972556 | 8.55E-05 |
| Ttc21a        | -1.18824059  | 3.626306586 | 0.000236 |
| 5330417C22Rik | -1.19418296  | 3.498657083 | 0.000317 |
| Plekhb1       | -1.194442239 | 18.84797267 | 1.42E-19 |
| Map3k19       | -1.196816997 | 4.413731703 | 3.86E-05 |
| Atp7b         | -1.197092044 | 7.164798194 | 6.84E-08 |
| Gm11346       | -1.19806084  | 3.271471332 | 0.000535 |
| Foxa1         | -1.214710092 | 3.761220725 | 0.000173 |
| Lypd2         | -1.21576181  | 2.03931095  | 0.009135 |
| Klhdc7a       | -1.219638269 | 6.40627241  | 3.92E-07 |
| Ccdc11        | -1.220610534 | 6.317575287 | 4.81E-07 |
| Gm867         | -1.222207083 | 2.735788454 | 0.001837 |
| Mapk15        | -1.225657723 | 6.016397128 | 9.63E-07 |
| Fhad1         | -1.225711908 | 6.574385692 | 2.66E-07 |
| Ces1e         | -1.228013106 | 3.180544443 | 0.00066  |
| Hmgcs2        | -1.22802358  | 2.850771694 | 0.00141  |
| Drc1          | -1.23179292  | 5.883795847 | 1.31E-06 |
| Lrguk         | -1.232336144 | 3.216077768 | 0.000608 |
| Cbr2          | -1.232795429 | 10.02068009 | 9.53E-11 |
| 1110017D15Rik | -1.234005499 | 5.113067073 | 7.71E-06 |
| 4833427G06Rik | -1.2374444   | 3.228014569 | 0.000592 |
| Ces2b         | -1.245334719 | 7.398233804 | 4.00E-08 |
| Kctd8         | -1.246835966 | 2.077279983 | 0.00837  |
| Tekt4         | -1.24861356  | 2.290534164 | 0.005122 |
| Fam179a       | -1.251401858 | 8.739021042 | 1.82E-09 |
| Tll6          | -1.256561438 | 3.778467906 | 0.000167 |
| Muc5b         | -1.256620231 | 2.949051503 | 0.001124 |
| Adam28        | -1.259103655 | 3.535716838 | 0.000291 |
| Nek5          | -1.261042666 | 2.494080469 | 0.003206 |
| Nrn1          | -1.262955973 | 3.998798168 | 0.0001   |
| Adra1a        | -1.263667359 | 7.738649229 | 1.83E-08 |
| Daw1          | -1.266861441 | 2.909594974 | 0.001231 |
| Clic6         | -1.267126216 | 6.434635385 | 3.68E-07 |
| Rgs22         | -1.267146325 | 4.454655392 | 3.51E-05 |
| Fam183b       | -1.271150963 | 5.26865059  | 5.39E-06 |
| Tcte1         | -1.273902569 | 2.633376904 | 0.002326 |
| Ccdc153       | -1.273928858 | 5.115903408 | 7.66E-06 |
| Ccdc40        | -1.275542439 | 2.912122705 | 0.001224 |
| Faim2         | -1.276225159 | 12.46074389 | 3.46E-13 |
| Zfp474        | -1.2791258   | 2.358374047 | 0.004382 |
| Ak7           | -1.28386717  | 4.383025115 | 4.14E-05 |
| Ccdc113       | -1.286608033 | 4.037775054 | 9.17E-05 |
| Mdh1b         | -1.288106315 | 2.8542115   | 0.001399 |
| Gas2l2        | -1.288616607 | 2.650563678 | 0.002236 |
| Dnah6         | -1.289478421 | 5.60355875  | 2.49E-06 |
| Ccdc81        | -1.290161168 | 2.314616675 | 0.004846 |
| Cacna2d4      | -1.294002217 | 2.276124513 | 0.005295 |

|               |              |             |          |
|---------------|--------------|-------------|----------|
| Kif27         | -1.294175013 | 12.23927245 | 5.76E-13 |
| Elmod1        | -1.294409999 | 3.182972862 | 0.000656 |
| 4930451C15Rik | -1.298285508 | 2.037126255 | 0.009181 |
| Iyd           | -1.301789875 | 2.790945934 | 0.001618 |
| Stk33         | -1.304723588 | 5.706304183 | 1.97E-06 |
| Acox1         | -1.306662081 | 5.67615638  | 2.11E-06 |
| Cfap44        | -1.313038853 | 3.799498132 | 0.000159 |
| Ttc18         | -1.314960182 | 3.189965076 | 0.000646 |
| Snhg11        | -1.31505066  | 9.315813359 | 4.83E-10 |
| Fam216b       | -1.315961248 | 6.811546156 | 1.54E-07 |
| Cdhr3         | -1.320456067 | 3.892557522 | 0.000128 |
| Glb113        | -1.328802245 | 13.93798814 | 1.15E-14 |
| Cldn8         | -1.328803535 | 2.100885054 | 0.007927 |
| Dnah9         | -1.335830984 | 2.668768058 | 0.002144 |
| 1700001C02Rik | -1.338267379 | 2.88541292  | 0.001302 |
| Lrrc43        | -1.343729691 | 2.992293412 | 0.001018 |
| Lrrc6         | -1.345126593 | 4.994180738 | 1.01E-05 |
| Nhlrc4        | -1.345810984 | 2.168862963 | 0.006779 |
| Edn1          | -1.348762621 | 2.244417053 | 0.005696 |
| 1700003M02Rik | -1.360176433 | 4.694393991 | 2.02E-05 |
| Rsph4a        | -1.368473402 | 5.834250757 | 1.46E-06 |
| Kcnmb2        | -1.369343319 | 5.266234967 | 5.42E-06 |
| Spata18       | -1.36938689  | 3.159017026 | 0.000693 |
| 1810010H24Rik | -1.378443249 | 5.37190118  | 4.25E-06 |
| Reg3g         | -1.378597671 | 2.103024438 | 0.007888 |
| Aldh3a1       | -1.379422782 | 3.401013597 | 0.000397 |
| Dnah5         | -1.383561211 | 7.630180062 | 2.34E-08 |
| Agr3          | -1.403911633 | 3.916235439 | 0.000121 |
| Ccdc147       | -1.410256935 | 2.324055686 | 0.004742 |
| Scgb1a1       | -1.414733893 | 5.602032517 | 2.5E-06  |
| Atp2c2        | -1.417587849 | 3.638479119 | 0.00023  |
| Fsip1         | -1.424272012 | 2.919889219 | 0.001203 |
| Tmem212       | -1.439509449 | 3.191375622 | 0.000644 |
| 1600029I14Rik | -1.441309964 | 3.195692266 | 0.000637 |
| Fam47e        | -1.445700556 | 3.415903472 | 0.000384 |
| Iqca          | -1.449341828 | 3.222769853 | 0.000599 |
| 1700026D08Rik | -1.452851263 | 5.265459709 | 5.43E-06 |
| Ttc29         | -1.46079333  | 6.316838646 | 4.82E-07 |
| Klh14         | -1.462942871 | 2.50844366  | 0.003101 |
| Spag16        | -1.464551441 | 7.091214154 | 8.11E-08 |
| Nek11         | -1.465272152 | 3.866850655 | 0.000136 |
| Pla2g1b       | -1.465576718 | 4.283117481 | 5.21E-05 |
| Cyp4a32       | -1.467743895 | 10.91278231 | 1.22E-11 |
| BC048546      | -1.468885741 | 4.111033791 | 7.74E-05 |
| Klf15         | -1.469441403 | 2.457985348 | 0.003483 |
| Efcab6        | -1.474092303 | 3.225329613 | 0.000595 |
| Itpka         | -1.479035716 | 4.608130743 | 2.47E-05 |
| Ccdc33        | -1.484876785 | 2.144908701 | 0.007163 |

|               |              |             |          |
|---------------|--------------|-------------|----------|
| Lrrc26        | -1.486746306 | 4.55658357  | 2.78E-05 |
| C330013F16Rik | -1.503145458 | 2.30368213  | 0.00497  |
| Colq          | -1.511408864 | 54.09128211 | 8.10E-55 |
| Igfbp3        | -1.531685449 | 19.19363055 | 6.40E-20 |
| Ldlrad1       | -1.538661613 | 4.697496388 | 2.01E-05 |
| Cyp2f2        | -1.539234069 | 7.944945923 | 1.14E-08 |
| Scgb3a1       | -1.540804393 | 3.090306049 | 0.000812 |
| Eno4          | -1.549349574 | 6.535239777 | 2.92E-07 |
| Sntn          | -1.550820641 | 5.355023722 | 4.42E-06 |
| Arhgef38      | -1.566576877 | 5.232103872 | 5.86E-06 |
| Lrriq1        | -1.567394045 | 2.121876216 | 0.007553 |
| D430036J16Rik | -1.578765311 | 4.394823237 | 4.03E-05 |
| Kndc1         | -1.595446323 | 4.700142601 | 1.99E-05 |
| Slc10a5       | -1.615084954 | 2.506480953 | 0.003115 |
| Fgfbp1        | -1.619967561 | 11.80567094 | 1.56E-12 |
| Ptpru         | -1.620879628 | 8.515351688 | 3.05E-09 |
| Bpifb1        | -1.626323777 | 2.566316617 | 0.002714 |
| Krt15         | -1.659132237 | 4.751844803 | 1.77E-05 |
| Fmo3          | -1.667349208 | 6.188360609 | 6.48E-07 |
| Pon1          | -1.692996768 | 11.24937882 | 5.63E-12 |
| Slc16a5       | -1.695760173 | 5.140976835 | 7.23E-06 |
| Aqp4          | -1.729897321 | 7.702227298 | 1.99E-08 |
| Dcdc2a        | -1.74892799  | 3.729215095 | 0.000187 |
| Cyp2a5        | -1.769331116 | 15.81024252 | 1.55E-16 |
| Ttc34         | -1.785839167 | 5.140976835 | 7.23E-06 |
| Fabp12        | -1.818058432 | 4.474994082 | 3.35E-05 |
| Gm12695       | -1.894375107 | 2.915523023 | 0.001215 |
| Cyp1a1        | -1.912316596 | 41.6129434  | 2.44E-42 |
| Sult1d1       | -1.936276022 | 5.121754858 | 7.56E-06 |
| Esm1          | -1.983727039 | 36.60265857 | 2.50E-37 |
| Hes2          | -2.073310536 | 4.782409677 | 1.65E-05 |
| D130043K22Rik | -2.165228004 | 4.517029735 | 3.04E-05 |
| Il22ra2       | -2.360486815 | 2.424443103 | 0.003763 |
| Krt5          | -2.376069607 | 2.691658478 | 0.002034 |
| 9530026P05Rik | -2.411992464 | 11.73140027 | 1.86E-12 |
| Bpifa1        | -2.427392823 | 16.84955128 | 1.41E-17 |
| Rag1          | -2.481411597 | 5.163105486 | 6.87E-06 |
| Gm609         | -2.601512933 | 2.05530625  | 0.008804 |
| Lrat          | -2.810287146 | 11.32893946 | 4.69E-12 |
| Cyp26b1       | -6.424675798 | 8.453826389 | 3.52E-09 |
