# Supplementary material for: Inhibition of angiogenesis and regenerative lung growth in Lepob/ob mice through adiponectin-VEGF/VEGFR2 signaling
Source: PubMed Central journal article supplement (PMC11521822; doi:10.3389/fcvm.2024.1491971), 2024-10-16
Supplement: Datasheet2.pdf [file Datasheet2.pdf]

| Biological Processes                                    | PValue      | Fold Enrichment | Genes                                                                                                                                                                                                                                                                                                                                                                                                                                                                                                                                                                                                                                                                                                                                                                                                                                                                                      |
|---------------------------------------------------------|-------------|-----------------|--------------------------------------------------------------------------------------------------------------------------------------------------------------------------------------------------------------------------------------------------------------------------------------------------------------------------------------------------------------------------------------------------------------------------------------------------------------------------------------------------------------------------------------------------------------------------------------------------------------------------------------------------------------------------------------------------------------------------------------------------------------------------------------------------------------------------------------------------------------------------------------------|
| Cell Cycle                                              | 2.58685E-52 | 4.98131113      | ERCC6L, ZWILCH, DSCC1, GMNN, CCNF, DIXDC1, BUB1B, MKI67, SMC2, CDC20, CHEK2, CHEK1, NUSAP1, RCC1, NEK2, OIP5, KNTC1, FBXO5, BORA, LIG1, TRP73, ESCO2, CDC25C, KNSTRN, MELK, CCNE2, CCNE1, FANCD2, FAM64A, KIF20B, CDCA2, CDCA3, CDCA5, CDCA8, PKMYT1, SKA3, PMF1, NCAPH, SKA1, SKA2, CCNB2, DSN1, CCNB1, BRINP1, RACGAP1, CLSPN, ECT2, FAM83D, CDT1, UBE2C, DDIA5, PLK1, CDC7, CDC6, NDC80, ANLN, TPX2, KIF18B, UBE25, CDK1, CNTROB, MCM7, MCM8, NCAPG2, BRCA1, KIF11, CHTF18, FOXM1, BRCA2, CKS1B, SMPD3, CHAF1B, CHAF1A, SGOL1, MIS18BP1, GSG2, NUF2, MYBL2, SPD1, DLGAP5, CEP55, HELLS, H2AFX, CKAP2, KIF23, MASTL, CCSAP, CIT, CCNA2, ASPM, CCNA1, DBF4, PSRC1, INCENP, MCM3, CKS2, BIRC5, GAS1, MCM5, KIF2C, MCM6, MCM2, UHRF1, NSL1, AURKB, AURKA, CDC45, E2F1, BUB1, E2F7, E2F8, CENPW, CDKN2C, SPAG5, TICRR, CENPE, WEE1, APITD1, PRC1, NCAPD2, SPC24, MAD2L1, SPC25, NEK11, CDKN3 |
| Cell Division                                           | 9.92865E-41 | 5.691800598     | ERCC6L, ZWILCH, NCAPG2, CCNF, KIF14, BUB1B, KIF11, SMC2, CKS1B, CDC20, SGOL1, MIS18BP1, CHEK2, NUF2, NUSAP1, RCC1, NEK2, OIP5, KNTC1, FBXO5, SPD1, CEP55, HELLS, BORA, LIG1, KIFC5B, KIF23, MASTL, CDC25C, CCSAP, KNSTRN, CIT, CCNA2, CCNA1, ASPM, PSRC1, CCNE2, KIFC1, CCNE1, INCENP, CKS2, BIRC5, FAM64A, MCM5, KIF2C, KIF20B, CDCA2, CDCA3, CDCA5, CDCA8, SKA3, PMF1, NSL1, AURKB, SKA1, NCAPH, AURKA, SKA2, CCNB2, CCNB1, DSN1, CDC45, RACGAP1, ECT2, FAM83D, BUB1, CENPW, SPAG5, UBE2C, PLK1, CDC7, CDC6, NDC80, ANLN, TPX2, CENPE, WEE1, APITD1, KIF18B, PRC1, UBE25, CDK1, NCAPD2, CNTROB, SPC24, SPC25, MAD2L1                                                                                                                                                                                                                                                                     |
| Mitotic Nuclear Division                                | 6.98062E-40 | 6.624963972     | ERCC6L, ZWILCH, NCAPG2, CCNF, BUB1B, KIF11, SMC2, CDC20, SGOL1, TUBB3, MIS18BP1, CHEK2, NUF2, NUSAP1, RCC1, NEK2, OIP5, KNTC1, FBXO5, SPD1, CEP55, HELLS, BORA, KIF23, MASTL, CDC25C, CCSAP, KNSTRN, CIT, CCNA2, CCNA1, ASPM, PSRC1, ESPL1, INCENP, BIRC5, FAM64A, KIF2C, KIF20B, CDCA2, CDCA3, CDCA5, CDCA8, SKA3, PMF1, NSL1, AURKB, SKA1, NCAPH, AURKA, SKA2, CCNB2, CCNB1, DSN1, FAM83D, BUB1, CENPW, SPAG5, UBE2C, PLK1, CDC6, NDC80, ANLN, TPX2, CENPE, WEE1, APITD1, KIF18B, CENPH, CDK1, NCAPD2, CENPN, SPC24, SPC25, MAD2L1                                                                                                                                                                                                                                                                                                                                                       |
| DNA Replication                                         | 2.07287E-20 | 7.161424469     | PIF1, FEN1, BLM, 2810417H13RIK, MCM7, MCM8, PRIM1, DSCC1, MCM10, BRCA1, CHTF18, CHAF1B, CDC45, CHAF1A, ORC1, POLE, GINS1, POLQ, GINS2, CDT1, RMI2, RRM1, RRM2, RFC4, LIG1, CDC6, ADRA2A, TICRR, POLA1, DBF4, POLE2, MCM3, MCM5, MCM6, DTL, MCM2                                                                                                                                                                                                                                                                                                                                                                                                                                                                                                                                                                                                                                            |
| Chromosome Segregation                                  | 7.07731E-18 | 7.972784358     | TOP2A, CDCA2, BRCA1, KIF11, SKA3, PMF1, NSL1, SKA1, SKA2, DSN1, SGOL1, RCC1, NEK2, OIP5, BUB1, CENPW, SPAG5, ESCO2, KNSTRN, NDC80, CENPE, CENPF, ESPL1, CENPH, INCENP, BIRC5, KIF2C, CENPN, SPC25                                                                                                                                                                                                                                                                                                                                                                                                                                                                                                                                                                                                                                                                                          |
| Mitotic Sister Chromatid Segregation                    | 6.16451E-13 | 14.89368712     | SPAG5, PLK1, CDCA8, CENPA, KNSTRN, NSL1, NDC80, CIT, DSN1, KIF18B, ESPL1, NUSAP1, NEK2, MAD2L1                                                                                                                                                                                                                                                                                                                                                                                                                                                                                                                                                                                                                                                                                                                                                                                             |
| Cellular Response to DNA Damage Stimulus                | 1.16369E-10 | 2.854623365     | TOP2A, FEN1, MCM7, MCM8, MCM10, BRCA1, FOXM1, BRCA2, PIDD1, CHAF1B, CHAF1A, EXO1, CHEK2, CHEK1, POLE, GEN1, LIG1, H2AFX, TRP73, MASTL, MMS22L, NEIL3, RAD51C, FANCD2, SPATA18, DTL, PIF1, 2810417H13RIK, BLM, PARPBP, UHRF1, UNG, RAD54B, RAD51AP1, BRIP1, RAD54L, CLSPN, E2F7, ZRANB3, BARD1, POLQ, EGLN3, ATAD5, DDIA5, TICRR, RAD51, APITD1, UBE2T, CDKN3                                                                                                                                                                                                                                                                                                                                                                                                                                                                                                                               |
| DNA Replication Initiation                              | 7.46665E-10 | 12.23410014     | POLA1, CDC45, CCNE2, MCM7, CCNE1, MCM3, CDC7, MCM5, MCM10, MCM6, CDC6, MCM2                                                                                                                                                                                                                                                                                                                                                                                                                                                                                                                                                                                                                                                                                                                                                                                                                |
| Microtubule-Based Movement                              | 1.22575E-08 | 5.646507755     | DNAH5, KIFC5B, KIF14, KIF23, DNAH9, KIF11, KIF22, KIF27, KIF15, KIF4, CENPE, KIF18A, KIF18B, KIFC1, DYNLRB2, KIF2C, KIF20A, KIF20B                                                                                                                                                                                                                                                                                                                                                                                                                                                                                                                                                                                                                                                                                                                                                         |
| DNA Repair                                              | 3.26326E-08 | 2.846928962     | PIF1, FEN1, BLM, 2810417H13RIK, ANKLE1, PARPBP, MCM8, UHRF1, BRCA1, FOXM1, BRCA2, UNG, RAD51AP1, BRIP1, CHAF1B, CHAF1A, EXO1, CHEK2, CHEK1, RAD54L, CLSPN, POLE, ZRANB3, GEN1, BARD1, POLQ, LIG1, H2AFX, KIF22, TICRR, MMS22L, NEIL3, RAD51C, RAD51, APITD1, FANCD2, UBE2T                                                                                                                                                                                                                                                                                                                                                                                                                                                                                                                                                                                                                 |
| Mitotic Metaphase Plate Congression                     | 5.88643E-08 | 8.63583539      | CENPE, KIF18A, CCNB1, PSRC1, KIFC1, CDCA5, KIFC5B, KIF14, CDCA8, KIF2C, SPD1, KIF22                                                                                                                                                                                                                                                                                                                                                                                                                                                                                                                                                                                                                                                                                                                                                                                                        |
| Mitotic Cytokinesis                                     | 1.7265E-07  | 8.971673433     | ANLN, RACGAP1, PLK1, STMN1, NUSAP1, CKAP2, KIF23, KIF20A, CENPA, CEP55, KIF4                                                                                                                                                                                                                                                                                                                                                                                                                                                                                                                                                                                                                                                                                                                                                                                                               |
| Chemokine-Mediated Signaling Pathway                    | 2.33183E-07 | 6.22826916      | CCL24, CCL12, CCL11, CXCL1, CXCL3, CXCL13, CXCL5, CCL9, CCL8, CCL7, CCR9, CCL2, ACKR1, PF4                                                                                                                                                                                                                                                                                                                                                                                                                                                                                                                                                                                                                                                                                                                                                                                                 |
| Cellular Response to Tumor Necrosis Factor              | 4.7248E-07  | 4.226325501     | CCL24, CCL12, EDN1, CALCA, CCL11, BRCA1, ADAMTS12, COL1A1, CCL9, CCL8, FABP4, CCL7, OCSTAMP, CCL2, HAS2, PCK1, PPARGC1A, DBN1, ADAMT57                                                                                                                                                                                                                                                                                                                                                                                                                                                                                                                                                                                                                                                                                                                                                     |
| Cell Adhesion                                           | 6.56795E-07 | 2.270245386     | PTPRU, SPON2, COL18A1, COL15A1, TENM3, COL16A1, TNFAIP6, LAMA1, TROAP, TNC, THBS2, NID2, WISP1, HAPLN1, CDH3, FLRT2, CDH2, CHL1, HAS1, SPP1, CLCA2, HAS2, CYP1B1, CDH24, NRCAM, NCAM1, EPHB1, AOC3, CADM4, MYBPC2, FN1, MFAP4, SDK1, VCAN, NFASC, COL5A1, COL6A2, CDHR1, COL6A1, ADAM12, COL6A4, CERCAM, CDHR3, COL6A6, COL6A5                                                                                                                                                                                                                                                                                                                                                                                                                                                                                                                                                             |
| Metaphase Plate Congression                             | 3.38964E-06 | 14.27311682     | CENPE, CENPF, KIF2C, KIF22, FAM83D, CENPQ, NDC80                                                                                                                                                                                                                                                                                                                                                                                                                                                                                                                                                                                                                                                                                                                                                                                                                                           |
| Cellular Response to Interleukin-1                      | 3.8958E-06  | 4.587787551     | CCL24, CCL12, EDN1, CCL11, SAA3, FN1, ADAMTS12, CCL9, CCL8, CCL7, CCL2, HAS2, SOX9, PCK1, ADAMT57                                                                                                                                                                                                                                                                                                                                                                                                                                                                                                                                                                                                                                                                                                                                                                                          |
| Double-Strand Break Repair via Homologous Recombination | 1.74004E-05 | 4.677744169     | GEN1, BLM, MCM8, H2AFX, TONSL, BRCA1, BRCA2, RAD54B, RAD51AP1, MMS22L, RAD51, RAD51C, RAD54L                                                                                                                                                                                                                                                                                                                                                                                                                                                                                                                                                                                                                                                                                                                                                                                               |
| Collagen Fibril Organization                            | 2.10752E-05 | 6.273897505     | COL1A1, ADAMTS2, COL3A1, COL1A2, COL5A1, LUM, COL11A1, COL5A2, CYP1B1, LOXL2                                                                                                                                                                                                                                                                                                                                                                                                                                                                                                                                                                                                                                                                                                                                                                                                               |
| Chemotaxis                                              | 2.41355E-05 | 3.5250797       | CCL24, CCL12, CCL11, HMGB2, CXCR5, CXCL3, CXCL13, CXCL5, CCL9, CCL8, CCL7, CCR9, C3AR1, CCL2, CCR5, CCR3, PF4                                                                                                                                                                                                                                                                                                                                                                                                                                                                                                                                                                                                                                                                                                                                                                              |
| Collagen Catabolic Process                              | 3.4529E-05  | 8.156066757     | ADAMTS2, MMP14, MMP13, CTSK, MMP2, MMP19, PRTN3, MMP10                                                                                                                                                                                                                                                                                                                                                                                                                                                                                                                                                                                                                                                                                                                                                                                                                                     |
| G1/S Transition of Mitotic Cell Cycle                   | 3.68705E-05 | 4.735780698     | TCF19, CDKN2C, CCNE2, CCNE1, CDCA5, RCC1, RHOU, INHBA, SKP2, IQGAP3, POLE, CDKN3                                                                                                                                                                                                                                                                                                                                                                                                                                                                                                                                                                                                                                                                                                                                                                                                           |
| G2/M Transition of Mitotic Cell Cycle                   | 4.15239E-05 | 6.673145528     | CHEK2, PLK1, CHEK1, BIRC5, MASTL, CDC25C, SKP2, FOXM1, CIT                                                                                                                                                                                                                                                                                                                                                                                                                                                                                                                                                                                                                                                                                                                                                                                                                                 |
| Positive Regulation of Cytokinesis                      | 4.15239E-05 | 6.673145528     | RACGAP1, CXCR5, KIF14, KIF23, CDC6, KIF20B, ECT2, AURKB, CIT                                                                                                                                                                                                                                                                                                                                                                                                                                                                                                                                                                                                                                                                                                                                                                                                                               |
| Mitotic Spindle Assembly                                | 6.54823E-05 | 6.291822927     | CDC20, TPX2, KIFC1, CHEK2, KIFC5B, BIRC5, NEK2, MYBL2, KIF11                                                                                                                                                                                                                                                                                                                                                                                                                                                                                                                                                                                                                                                                                                                                                                                                                               |
| Protein Heterotrimerization                             | 7.78534E-05 | 9.0146001       | COL1A1, COL1A2, COL6A2, C1QTNF6, COL6A1, ADIPOQ, COL6A4                                                                                                                                                                                                                                                                                                                                                                                                                                                                                                                                                                                                                                                                                                                                                                                                                                    |

|                                                                  |             |             |                                                                                                                                                                                                                                                                                     |
|------------------------------------------------------------------|-------------|-------------|-------------------------------------------------------------------------------------------------------------------------------------------------------------------------------------------------------------------------------------------------------------------------------------|
| Aging                                                            | 8.62644E-05 | 2.828693673 | NTRK1, CALCA, ARG1, SERPINF1, ABAT, TYMS, ADRA1A, AURKB, AGT, DCN, ALDH3A1, COL3A1, KRT14, CYP1A1, CCL2, NCAM1, TIMP1, APOE, PCK1, PPARGC1A                                                                                                                                         |
| Regulation of Attachment of Spindle Microtubules to Kinetochores | 8.72876E-05 | 17.47728591 | RACGAP1, SPAG5, NEK2, ECT2, KNSTRN                                                                                                                                                                                                                                                  |
| Cytokinesis                                                      | 9.99357E-05 | 5.95172439  | PRC1, INCENP, PLK1, BIRC5, KIF23, KIF20A, ECT2, BRCA2, CIT                                                                                                                                                                                                                          |
| Mitotic Spindle Organization                                     | 0.00010243  | 6.990914363 | STIL, CCNB1, STMN1, RCC1, AURKB, NDC80, SPC25, AURKA                                                                                                                                                                                                                                |
| Mitotic Chromosome Condensation                                  | 0.000109384 | 11.29301551 | CDCA5, NUSAP1, NCAPG, NCAPD2, NCAPH, SMC2                                                                                                                                                                                                                                           |
| Cell Activation                                                  | 0.000164448 | 10.48637154 | LYPD1, FN1, LYPD2, IGF1, TIMP1, SLURP1                                                                                                                                                                                                                                              |
| Inflammatory Response                                            | 0.000190111 | 2.133854675 | CCL12, TPSB2, CALCA, CCL11, CD5L, HMGB2, CXCL1, REG3G, CXCL3, CXCL13, CXCL5, CCL9, CYP26B1, CCL8, CCL7, SPP1, C3AR1, CCL2, BDKRB1, CCR5, CCR3, CCL24, CD163, NR1H4, TRP73, CHIL3, HC, ACKR1, CHIL4, PF4                                                                             |
| Positive Regulation of Protein Kinase C Activity                 | 0.000262631 | 24.46820027 | CEMP1, WNT5A, ROR2, AGT                                                                                                                                                                                                                                                             |
| Cellular Response to Retinoic Acid                               | 0.000282918 | 4.140772353 | COL1A1, CYP26A1, CYP26B1, BRINP1, TESC, SERPINF1, OSR1, TNC, CCL2, SOX9, PCK1                                                                                                                                                                                                       |
| Activation of Protein Kinase Activity                            | 0.000309398 | 5.931684914 | TPX2, CALCA, CKS2, KIF14, CLSPN, ECT2, ADRA2A, CKS1B                                                                                                                                                                                                                                |
| Chromosome Condensation                                          | 0.000335176 | 9.175575101 | TOP2A, NCAPG2, CDK1, NCAPD2, NCAPH, SMC2                                                                                                                                                                                                                                            |
| Spindle Organization                                             | 0.000335176 | 9.175575101 | ASPM, SPAG5, KIF11, KNSTRN, AURKB, AURKA                                                                                                                                                                                                                                            |
| Response to Drug                                                 | 0.000344462 | 2.093149876 | COL18A1, NNMT, MCM7, HMGB2, ABAT, PTN, TYMS, ADRA1A, RAD54B, CCNB1, CDH3, LGALS1, MDK, RAD54L, NCAM1, PPARGC1A, ABCB1B, NTRK1, CBX7, ARG1, MMP2, TRP73, INHBA, COL1A1, ALDH3A1, RAD51, SCGB1A1, CYP1A1, CDK1                                                                        |
| Axon Guidance                                                    | 0.000393367 | 2.791673856 | NTRK1, MEG3, LAMA1, WNT5A, CRMP1, EFNA5, EFNA4, NFASC, FLRT2, LHX2, TUBB3, CHL1, GAS1, NCAM1, NRCAM, EPHB2, EPHB1                                                                                                                                                                   |
| Cellular Response to Interferon-Gamma                            | 0.000411696 | 3.95809122  | CCL24, CCL9, CCL12, EDN1, CCL8, CCL11, GBP10, CCL7, WNT5A, CCL2, AQP4                                                                                                                                                                                                               |
| Eosinophil Chemotaxis                                            | 0.000474593 | 12.23410014 | CCL24, CCL11, CCL7, CCL2, CCR3                                                                                                                                                                                                                                                      |
| DNA Unwinding Involved In DNA Replication                        | 0.000474593 | 12.23410014 | TOP2A, RAD51, MCM7, MCM6, MCM2                                                                                                                                                                                                                                                      |
| Protein Localization to Kinetochores                             | 0.000474593 | 12.23410014 | CDK1, BUB1B, TTK, SPD1L, AURKB                                                                                                                                                                                                                                                      |
| Mitotic Cell Cycle Phase Transition                              | 0.000636599 | 19.57456022 | CKS2, CDK1, NEK11, CKS1B                                                                                                                                                                                                                                                            |
| Endodermal Cell Differentiation                                  | 0.000642531 | 6.343607478 | MMP14, COL11A1, MMP2, COL6A1, FN1, INHBA, NODAL                                                                                                                                                                                                                                     |
| Microtubule Bundle Formation                                     | 0.000642531 | 6.343607478 | TTL6, PSRC1, CAPN6, PRC1, PLK1, KIF20A, GAS2L2                                                                                                                                                                                                                                      |
| Male Gonad Development                                           | 0.000645266 | 3.058525034 | RRM1, TESC, WNT5A, HMGB2, LRRC6, INHBA, ASPM, MMP14, BRIP1, WT1, SOX8, SOX9, WNT4, BOK                                                                                                                                                                                              |
| DNA Recombination                                                | 0.000661701 | 3.454334156 | RAD51AP1, PIF1, BLM, RAD51, RAD51C, LIG1, EXO1, H2AFX, HMGB2, BRCA1, BRCA2, RAG1                                                                                                                                                                                                    |
| Spermatogenesis                                                  | 0.000672503 | 1.923789702 | LRGUK, HMGB2, BRCA2, CHTF18, AK7, C330027C09RIK, CLGN, BRIP1, ADAMTS2, CCNB1, CYP26B1, RACGAP1, E2F1, 1110017D15RIK, SOX8, SOX9, TSNAXIP1, CCDC33, TCP11, RPL39L, NDC1, H2AFX, NME5, CDC25C, CIT, CCNA1, ASPM, RAD51C, WT1, MYCBPAP, TRIP13, SPATA18                                |
| Cell Proliferation                                               | 0.000712836 | 2.335600935 | MCM7, UHRF1, MCM10, IGF1, MKI67, BRCA2, AURKB, CKS1B, POLA1, UCHL1, MELK, CKS2, CYP1A1, CDK1, TACC3, FAM83D, BUB1, TSPAN1, CFB, E2F8, BOK                                                                                                                                           |
| Extracellular Matrix Organization                                | 0.000764012 | 3.0048667   | VIT, COL18A1, OLFML2B, LAMA1, ELN, FN1, NID2, AGT, CCDC80, COL5A3, ADAMTSL2, COL6A4, VWA1, SOX9                                                                                                                                                                                     |
| Protein Phosphorylation                                          | 0.000768588 | 1.741660089 | LAMA1, BUB1B, TTK, MST1R, PKMYT1, AURKB, AURKA, CCNB1, STK33, CHEK2, GSG2, CHEK1, PBK, NEK2, EPHB2, BUB1, EPHB1, PLK4, NTRK1, CDKL4, NEK5, IGFBP3, PLK1, WNT5A, CDC7, PASK, MASTL, MAPK15, DCLK1, CIT, MAPK10, WEE1, MELK, CCNE1, MAP3K19, CDK1, BIRC5, FAM20C, ROR2, CAMK1G, NEK11 |
| Positive Regulation of Inflammatory Response                     | 0.000982989 | 3.883841313 | CCL24, CCL9, CCL12, CCL8, CCL11, FABP4, CCL7, WNT5A, CCL2, CCR5                                                                                                                                                                                                                     |
| Regulation of Mitotic Nuclear Division                           | 0.001038661 | 7.340460081 | CENPE, BORA, RCC1, FBXO5, MKI67, KIF20B                                                                                                                                                                                                                                             |
| Monocyte Chemotaxis                                              | 0.001053875 | 4.893640054 | CCL24, CCL9, CCL12, CALCA, CCL8, CCL11, CCL7, CCL2                                                                                                                                                                                                                                  |
| Collagen Biosynthetic Process                                    | 0.001234537 | 16.31213351 | COL1A1, ADAMTS3, COL5A1, ARG1                                                                                                                                                                                                                                                       |
| Mitotic Spindle Midzone Assembly                                 | 0.001234537 | 16.31213351 | RACGAP1, KIF23, AURKB, KIF4                                                                                                                                                                                                                                                         |
| G2 DNA Damage Checkpoint                                         | 0.001317871 | 6.990914363 | PLK1, CHEK1, CLSPN, BRCA1, DTL, NEK11                                                                                                                                                                                                                                               |
| Axoneme Assembly                                                 | 0.00164878  | 6.673145528 | SPAG16, LRGUK, RSPH1, RSPH4A, AK7, CCDC40                                                                                                                                                                                                                                           |
| Neutrophil Chemotaxis                                            | 0.001895059 | 3.546115981 | CCL24, CCL9, CCL12, CCL8, CCL11, CCL7, SPP1, CCL2, CXCL1, CXCL3                                                                                                                                                                                                                     |
| Lymphocyte Chemotaxis                                            | 0.001952452 | 5.1902243   | CCL24, CCL9, CCL12, CCL8, CCL11, CCL7, CCL2                                                                                                                                                                                                                                         |
| Microtubule Depolymerization                                     | 0.001985089 | 8.738642954 | KIF18A, KIF18B, STMN1, KIF14, KIF2C                                                                                                                                                                                                                                                 |
| Cellular Response to Platelet-Derived Growth Factor Stimulus     | 0.002036809 | 6.383008766 | CCNA2, ERFF1, HAS1, CCL2, HAS2, PTN                                                                                                                                                                                                                                                 |
| Phosphorylation                                                  | 0.00236113  | 1.639209495 | LRGUK, BUB1B, TTK, MST1R, AK5, PKMYT1, AK7, AURKB, AURKA, STK33, CHEK2, GSG2, CHEK1, PBK, NEK2, TK1, EPHB2, BUB1, EPHB1, PLK4, NTRK1, CDKL4, NEK5, PLK1, CDC7, NME4, PASK, MASTL, MAPK15, DCLK1, CIT, MAPK10, WEE1, MELK, MAP3K19, ITPKA, CDK1, FAM20C, ROR2, CAMK1G, NEK11         |
| Replication Fork Processing                                      | 0.002487463 | 6.117050068 | ZRANB3, MMS22L, BLM, RAD51, APITD1, TONSL                                                                                                                                                                                                                                           |
| Positive Regulation of Transcription, DNA-Templated              | 0.002549274 | 1.65670106  | MEG3, BLM, MYRF, HMGB2, BRCA1, FOXM1, BRCA2, CKS1B, MDK, CHEK2, E2F1, SOX8, SOX9, PPARGC1A, FGF23, WNT4, TESC, ATAD2, WNT5A, TRP73, EBF2, EBF3, IGF1, INHBA, GDF6, KLF15, ETV4, AGT, CCNA2, COL1A1, MLXIPL, PSRC1, WT1, LHX2, CKS2, NFE2L3, PGR, ROR2, ZFPM2                        |
| Cilium Movement                                                  | 0.002670239 | 4.893640054 | RSPH4A, DNAH10, DNAH5, DNAH6, LRRC6, DNALI1, CCDC40                                                                                                                                                                                                                                 |

|                                                                                                                 |             |             |                                                                                                                                                                                                                                                                                                                                  |
|-----------------------------------------------------------------------------------------------------------------|-------------|-------------|----------------------------------------------------------------------------------------------------------------------------------------------------------------------------------------------------------------------------------------------------------------------------------------------------------------------------------|
| Response to Lipopolysaccharide                                                                                  | 0.003005409 | 2.235673121 | SPON2, EDN1, WFDC21, SPARC, PTGER3, HMGB2, FMO1, CXCL1, CXCL3, CXCL13, LOXL1, CXCL5, DCN, SCGB1A1, CYP1A1, BDKRB1, PCK1, PF4                                                                                                                                                                                                     |
| Cellular Response to Hypoxia                                                                                    | 0.003196758 | 2.850664109 | FABP1, CCNA2, CCNB1, EDN1, FNDC1, E2F1, TWIST1, HMOX1, PTN, PCK1, PPARGC1A, KCNK2                                                                                                                                                                                                                                                |
| Regulation of Mitotic Spindle Organization                                                                      | 0.0032506   | 12.23410014 | TPX2, BORA, PSRC1, TACC3                                                                                                                                                                                                                                                                                                         |
| Maternal Process Involved in Parturition                                                                        | 0.0032506   | 12.23410014 | EDN1, CYP1A1, CCL2, NODAL                                                                                                                                                                                                                                                                                                        |
| Response to Activity                                                                                            | 0.003537167 | 3.994808207 | NTRK1, EDN1, ADIPOQ, CDK1, CCL2, PTN, PCK1, PPARGC1A                                                                                                                                                                                                                                                                             |
| ERK1 and ERK2 Cascade                                                                                           | 0.003598882 | 5.646507755 | CCL11, IGF1, SOX9, IQGAP3, CCR3, AGT                                                                                                                                                                                                                                                                                             |
| Response to Mechanical Stimulus                                                                                 | 0.00395037  | 3.495457182 | COL3A1, MMP14, CCNB1, MMP2, TNC, CCL2, BDKRB1, KCNK2, DCN                                                                                                                                                                                                                                                                        |
| Double-Strand Break Repair                                                                                      | 0.00395037  | 3.495457182 | POLQ, LIG1, CHEK2, CDCA5, RAD54L, TRIP13, ESCO2, BRCA1, BRCA2                                                                                                                                                                                                                                                                    |
| Immune Response                                                                                                 | 0.004000488 | 1.97904561  | H2-EB2, CCL24, CCL12, CCL11, CMA1, MCPT4, CXCR5, CXCL1, PRG4, CXCL3, CXCL13, CXCL5, VPREB3, CCL9, CCL8, CCL7, CCR9, CCL2, ENPP3, CCR5, FCGR2B, PF4                                                                                                                                                                               |
| Positive Regulation of Cell Migration                                                                           | 0.004084037 | 2.169594113 | COL18A1, LRRC15, CCL24, EDN1, CEMIP, CCL11, TNFAIP6, MMP2, ARHGFB3, FN1, IGF1, ADRA2A, COL1A1, MMP14, FAM110C, C3AR1, HAS2, ROR2                                                                                                                                                                                                 |
| Cell Chemotaxis                                                                                                 | 0.004410917 | 3.136948753 | CCL9, CCL12, CCL8, SAA3, HMGB2, CCL2, CXCL1, CXCL13, EPHB1, CXCL5                                                                                                                                                                                                                                                                |
| Protein K6-Linked Ubiquitination                                                                                | 0.004728777 | 10.87475568 | BARD1, UBE2S, UBE2T, BRCA1                                                                                                                                                                                                                                                                                                       |
| Kinetochore Assembly                                                                                            | 0.004728777 | 10.87475568 | CENPW, APITD1, CENPH, CENPA                                                                                                                                                                                                                                                                                                      |
| Attachment of Spindle Microtubules to Kinetochore                                                               | 0.004728777 | 10.87475568 | CENPE, SGOL1, NUF2, NDC80                                                                                                                                                                                                                                                                                                        |
| Regulation of Mitotic Metaphase/Anaphase Transition                                                             | 0.004728777 | 10.87475568 | CENPE, UBE2C, PLK1, CDC6                                                                                                                                                                                                                                                                                                         |
| Spindle Checkpoint                                                                                              | 0.004855424 | 24.46820027 | BIRC5, SPDL1, AURKB                                                                                                                                                                                                                                                                                                              |
| Retinal Rod Cell Differentiation                                                                                | 0.004855424 | 24.46820027 | SOX8, SOX9, PTN                                                                                                                                                                                                                                                                                                                  |
| Renal Vesicle Induction                                                                                         | 0.004855424 | 24.46820027 | SOX8, SOX9, WNT4                                                                                                                                                                                                                                                                                                                 |
| Wound Healing                                                                                                   | 0.004968517 | 2.863300032 | COL1A1, COL3A1, CDH3, SPARC, SERPINB2, WNT5A, ALOX15, TNC, FN1, TIMP1, DCN                                                                                                                                                                                                                                                       |
| Mitotic Spindle Assembly Checkpoint                                                                             | 0.005329038 | 6.796722297 | CENPE, PLK1, BUB1B, BUB1, MAD2L1                                                                                                                                                                                                                                                                                                 |
| Negative Regulation of Neuron Apoptotic Process                                                                 | 0.005968007 | 2.293893775 | GABRB3, NTRK1, CCL12, KIF14, TRP73, FAIM2, AGT, CHL1, MDK, HMOX1, CCL2, BIRC5, APOE, PPARGC1A, BOK                                                                                                                                                                                                                               |
| Regulation of Cell Cycle                                                                                        | 0.006057104 | 2.621592886 | FOXA1, 2810417H13RIK, CCNE2, CCNE1, FIGLN1, CCNF, E2F1, TACC3, MASTL, SKP2, DTL, PRR11                                                                                                                                                                                                                                           |
| Regulation of Microtubule Polymerization Or Depolymerization                                                    | 0.006551998 | 9.787280108 | STMN1, SKA3, SKA1, SKA2                                                                                                                                                                                                                                                                                                          |
| Positive Regulation of Keratinocyte Proliferation                                                               | 0.006551998 | 9.787280108 | TGM1, CDH3, HAS2, REG3G                                                                                                                                                                                                                                                                                                          |
| Anaphase-Promoting Complex-Dependent Catabolic Process                                                          | 0.006551998 | 9.787280108 | CDC20, 1500015O10RIK, UBE2S, UBE2C                                                                                                                                                                                                                                                                                               |
| Complement Activation, Alternative Pathway                                                                      | 0.006551998 | 9.787280108 | CFD, HC, CFP, CFB                                                                                                                                                                                                                                                                                                                |
| Artery Smooth Muscle Contraction                                                                                | 0.006551998 | 9.787280108 | SMPD3, EDN1, AGT, CACNA1G                                                                                                                                                                                                                                                                                                        |
| Positive Regulation of Cell-Substrate Adhesion                                                                  | 0.006781905 | 4.078033378 | VIT, CCDC80, ALOX15, SPP1, PTN, FBLN2, DBN1                                                                                                                                                                                                                                                                                      |
| Positive Regulation of Gtpase Activity                                                                          | 0.006846855 | 2.346265779 | NTRK1, CCL24, CCL12, CCL11, RGS16, WNT5A, ELMOD1, CCL9, CCL8, CCL7, CCL2, ECT2, EZH2, WNT4                                                                                                                                                                                                                                       |
| Negative Regulation of Neuron Death                                                                             | 0.00747482  | 3.495457182 | GABRB3, NTRK1, CHGA, MDK, SERPINF1, IGF1, APOE, PPARGC1A                                                                                                                                                                                                                                                                         |
| Positive Regulation of Synapse Assembly                                                                         | 0.007512384 | 3.145911463 | NTRK1, FLRT2, SLITRK4, TPBG, LRRN1, THBS2, EPHB2, EFNA5, EPHB1                                                                                                                                                                                                                                                                   |
| Positive Regulation of Cell-Cell Adhesion                                                                       | 0.007909363 | 6.117050068 | WNT5A, CCL2, CCR5, NODAL, TBX18                                                                                                                                                                                                                                                                                                  |
| Response to Ionizing Radiation                                                                                  | 0.008229123 | 3.434133371 | RRM1, RAD51, RAD51C, KRT14, RAD54L, BRCA1, TICRR, RAD54B                                                                                                                                                                                                                                                                         |
| Extracellular Fibril Organization                                                                               | 0.008738336 | 8.897527371 | MFAP5, MFAP4, COL3A1, COL5A1                                                                                                                                                                                                                                                                                                     |
| Negative Regulation of Angiogenesis                                                                             | 0.00887432  | 3.058525034 | MEG3, SPARC, SERPINF1, CCL2, PTN, THBS2, AGT, DCN, PF4                                                                                                                                                                                                                                                                           |
| Response to Axon Injury                                                                                         | 0.009010065 | 4.587787551 | NTRK1, LGALS1, ARG1, CDK1, FOLR1, KCNK2                                                                                                                                                                                                                                                                                          |
| Regulation of Mitotic Centrosome Separation                                                                     | 0.009448217 | 18.3511502  | CHEK1, NEK2, KIF11                                                                                                                                                                                                                                                                                                               |
| Cellular Response to Fatty Acid                                                                                 | 0.009460302 | 5.825761969 | CCNB1, EDN1, E2F1, UCP1, NR1H4                                                                                                                                                                                                                                                                                                   |
| Positive Regulation of Angiogenesis                                                                             | 0.010625841 | 2.426598374 | CCL24, CCL11, CMA1, WNT5A, VASH2, C3AR1, CYP1B1, HMOX1, HC, BRCA1, CCR3, NODAL                                                                                                                                                                                                                                                   |
| Calcium Ion Transport Into Cytosol                                                                              | 0.01130184  | 8.156066757 | CACNA1I, RYR2, ADRA1A, CACNA1G                                                                                                                                                                                                                                                                                                   |
| Prostate Gland Epithelium Morphogenesis                                                                         | 0.01130184  | 8.156066757 | FOXA1, MMP2, TNC, IGF1                                                                                                                                                                                                                                                                                                           |
| DNA Damage Response, Signal Transduction By P53 Class Mediator Resulting In Transcription of P21 Class Mediator | 0.01130184  | 8.156066757 | CHEK2, TRP73, FOXM1, BRCA2                                                                                                                                                                                                                                                                                                       |
| Response to Gamma Radiation                                                                                     | 0.011646232 | 4.317917695 | CCL7, FANCD2, CHEK2, TRP73, CCL2, BRCA2                                                                                                                                                                                                                                                                                          |
| Cellular Response to Transforming Growth Factor Beta Stimulus                                                   | 0.011813636 | 3.208944298 | COL1A1, EDN1, ARG1, WNT5A, SOX9, PPARGC1A, DBN1, WNT4                                                                                                                                                                                                                                                                            |
| Cell Migration                                                                                                  | 0.011825033 | 2.049692169 | MMP2, WNT5A, GFRA1, ADAMTS12, MMP14, DEPDC1B, CDH2, COL5A1, MDK, FSCN1, BDKRB1, CD248, FAM83D, TSPAN1, NODAL, CTHRC1                                                                                                                                                                                                             |
| Skeletal System Development                                                                                     | 0.012080827 | 2.515422458 | COL1A1, COL3A1, VCAN, EDN1, COL1A2, COL5A2, FAM20C, ROR2, SOX9, HAPLN1, FBN1                                                                                                                                                                                                                                                     |
| Cell Differentiation                                                                                            | 0.012575311 | 1.442996426 | MEG3, PTPRU, LRGUK, TENM3, MYRF, ILDR2, TWIST1, EFNA5, DMKN, CLGN, CDC20, RACGAP1, MDK, CHL1, OCSTAMP, INSC, STMN1, NHS, AGR3, 1110017D15RIK, MYBL2, SOX9, TSNAXIP1, CCHCR1, ECT2, MYBL1, FGF23, TCP11, WNT4, NTRK1, SRRM4, TESC, OSR1, WNT5A, NME5, DLK1, TBX18, DCLK1, CIT, CCNA1, MMP19, MYCBPAP, ROR2, TRIP13, SPATA18, DBN1 |
| Embryo Development                                                                                              | 0.015113426 | 2.787516487 | MEG3, RACGAP1, WNT5A, CKS2, BIRC5, LRAT, BUB1, DLK1, CKS1B                                                                                                                                                                                                                                                                       |

|                                                                                  |             |             |                                                                                                                                                                                                                                                     |
|----------------------------------------------------------------------------------|-------------|-------------|-----------------------------------------------------------------------------------------------------------------------------------------------------------------------------------------------------------------------------------------------------|
| Positive Regulation of Vascular Endothelial Growth Factor Production             | 0.015251893 | 5.097541723 | C3AR1, CYP1B1, HC, BRCA1, NODAL                                                                                                                                                                                                                     |
| Protein Localization to Chromosome, Centromeric Region                           | 0.015322628 | 14.68092016 | GSG2, BUB1B, CENPA                                                                                                                                                                                                                                  |
| Double-Strand Break Repair via Break-Induced Replication                         | 0.015322628 | 14.68092016 | GINS2, CDC45, CDC7                                                                                                                                                                                                                                  |
| Metaphase/Anaphase Transition of Mitotic Cell Cycle                              | 0.015322628 | 14.68092016 | TACC3, BUB1B, CIT                                                                                                                                                                                                                                   |
| Mast Cell Chemotaxis                                                             | 0.015322628 | 14.68092016 | CHGA, CCL11, CCR3                                                                                                                                                                                                                                   |
| Eye Morphogenesis                                                                | 0.015322628 | 14.68092016 | COL5A1, COL5A2, GAS1                                                                                                                                                                                                                                |
| Positive Regulation of Fibroblast Proliferation                                  | 0.016408321 | 3.011470803 | CCNA2, CCNB1, WNT5A, E2F1, FN1, IGF1, CDC6, AGT                                                                                                                                                                                                     |
| Regulation of Mitotic Cell Cycle                                                 | 0.016511596 | 3.96781626  | PLK1, CKS2, TRP73, BIRC5, FBXO5, CKS1B                                                                                                                                                                                                              |
| Negative Regulation of DNA Biosynthetic Process                                  | 0.017598693 | 6.990914363 | MEG3, CHEK1, ADIPOQ, KCNK2                                                                                                                                                                                                                          |
| Mitotic Cell Cycle                                                               | 0.01839287  | 3.863400043 | CENPE, CENPF, RRM1, CENPW, KIF18B, AURKA                                                                                                                                                                                                            |
| Chromosome Organization                                                          | 0.01839287  | 3.863400043 | BLM, CENPW, CDCA8, RAD54L, BRCA2, SMC2                                                                                                                                                                                                              |
| Cartilage Development                                                            | 0.018582161 | 2.685534176 | EDN1, MMP13, LUM, COL11A1, WNT5A, PRRX2, TIMP1, SOX9, TYMS                                                                                                                                                                                          |
| Positive Regulation of Endothelial Cell Proliferation                            | 0.019125342 | 2.921576152 | CCL24, CCL11, ARG1, WNT5A, VASH2, HMGB2, CCL2, CCR3                                                                                                                                                                                                 |
| Cerebral Cortex Development                                                      | 0.020595493 | 2.878611797 | ASPM, COL3A1, CDH2, LHX2, MDK, H2AFX, TACC3, KIF14                                                                                                                                                                                                  |
| Retinoic Acid Metabolic Process                                                  | 0.021343305 | 6.524853406 | CYP26A1, ALDH1A3, CYP26B1, LRAT                                                                                                                                                                                                                     |
| Nucleoside Diphosphate Phosphorylation                                           | 0.021343305 | 6.524853406 | NME4, NME5, AK5, AK7                                                                                                                                                                                                                                |
| Regulation of Double-Strand Break Repair via Homologous Recombination            | 0.021343305 | 6.524853406 | RAD51AP1, RAD51, FIGNL1, CHEK1                                                                                                                                                                                                                      |
| Chromosome Organization Involved In Meiotic Cell Cycle                           | 0.022366674 | 12.23410014 | RAD51, CCNE2, CCNE1                                                                                                                                                                                                                                 |
| Negative Regulation of Centrosome Duplication                                    | 0.022366674 | 12.23410014 | KIFC1, CCNF, KIFC5B                                                                                                                                                                                                                                 |
| Intramembranous Ossification                                                     | 0.022366674 | 12.23410014 | COL1A1, CTSK, MMP2                                                                                                                                                                                                                                  |
| Positive Regulation of Cyclin-Dependent Protein Serine/Threonine Kinase Activity | 0.022884846 | 4.531148198 | STIL, PSRC1, CKS2, CDC6, CKS1B                                                                                                                                                                                                                      |
| Regulation of Cell Proliferation                                                 | 0.024179707 | 1.832420285 | EGLN3, SPARC, TNC, CDCA7, PRG4, IGF1, BRCA1, CXCL3, CXCL13, FOXM1, BRCA2, CXCL5, NR3C2, CHEK1, SOX9, PF4, EZH2                                                                                                                                      |
| Microtubule-Based Process                                                        | 0.02486513  | 3.580712235 | TUBA1C, TUBB6, TUBB2B, TUBB5, TUBB3, TUBE1                                                                                                                                                                                                          |
| Epithelial Cilium Movement                                                       | 0.025488237 | 6.117050068 | NME5, AK7, KIF27, CCDC40                                                                                                                                                                                                                            |
| Inner Cell Mass Cell Proliferation                                               | 0.025488237 | 6.117050068 | GINS1, CHEK1, NCAPG2, BRCA2                                                                                                                                                                                                                         |
| Negative Regulation of Smooth Muscle Cell Migration                              | 0.025488237 | 6.117050068 | NDRG4, IGFBP3, ADIPOQ, PPARGC1A                                                                                                                                                                                                                     |
| Sertoli Cell Development                                                         | 0.025488237 | 6.117050068 | NTRK1, WT1, SOX8, SOX9                                                                                                                                                                                                                              |
| Cell Proliferation In Forebrain                                                  | 0.025488237 | 6.117050068 | RRM1, FABP7, KIF14, DIXDC1                                                                                                                                                                                                                          |
| Axon Regeneration                                                                | 0.025488237 | 6.117050068 | DHFR, CHL1, APOE, FOLR1                                                                                                                                                                                                                             |
| Positive Regulation of Cellular Protein Metabolic Process                        | 0.025488237 | 6.117050068 | UHRF1, ADIPOQ, INHBA, AGT                                                                                                                                                                                                                           |
| Negative Regulation of Inflammatory Response                                     | 0.025570731 | 2.531193131 | MIR147, TNFAIP6, SERPINF1, ADIPOQ, PBK, NR1H4, APOE, CD276, IL22RA2                                                                                                                                                                                 |
| Organ Regeneration                                                               | 0.026050043 | 3.058525034 | CCNA2, PTPRU, NNMT, CDK1, CCL2, MKI67, CXCL5                                                                                                                                                                                                        |
| Mitotic Cell Cycle Checkpoint                                                    | 0.029058918 | 4.218655219 | ZWILCH, CHEK1, KNTC1, TTK, MAD2L1                                                                                                                                                                                                                   |
| Spindle Assembly                                                                 | 0.029058918 | 4.218655219 | TPX2, TUBB5, RCC1, FBXO5, KIF11                                                                                                                                                                                                                     |
| Negative Regulation of Cytokinesis                                               | 0.030475355 | 10.48637154 | E2F7, AURKB, E2F8                                                                                                                                                                                                                                   |
| Positive Regulation of Male Gonad Development                                    | 0.030475355 | 10.48637154 | WT1, SOX9, ZFPM2                                                                                                                                                                                                                                    |
| Positive Regulation of Mitotic Cell Cycle Spindle Assembly Checkpoint            | 0.030475355 | 10.48637154 | GEN1, NDC80, MAD2L1                                                                                                                                                                                                                                 |
| Protein Localization to Chromatin                                                | 0.030475355 | 10.48637154 | PLK1, ESCO2, EZH2                                                                                                                                                                                                                                   |
| Positive Regulation of Ubiquitin Protein Ligase Activity                         | 0.030475355 | 10.48637154 | CDC20, UBE2S, PLK1                                                                                                                                                                                                                                  |
| Copper Ion Import                                                                | 0.030475355 | 10.48637154 | ATP7B, STEAP4, STEAP1                                                                                                                                                                                                                               |
| Glomerular Visceral Epithelial Cell Differentiation                              | 0.030475355 | 10.48637154 | BASP1, WT1, KLF15                                                                                                                                                                                                                                   |
| Lung Development                                                                 | 0.030531725 | 2.170566153 | FOXA1, ADAMTS2, MMP14, SPARC, ARG1, WNT5A, IGF1, PTN, ZFPM2, NODAL, CCDC40                                                                                                                                                                          |
| DNA Damage Checkpoint                                                            | 0.032480729 | 4.078033378 | CHEK2, H2AFX, CHEK1, E2F1, CLSPN                                                                                                                                                                                                                    |
| Synapsis                                                                         | 0.032480729 | 4.078033378 | NDC1, BRIP1, CCNE2, FANCD2, CCNE1                                                                                                                                                                                                                   |
| Response to Glucocorticoid                                                       | 0.033130294 | 2.609941362 | ALDH3A1, PTPRU, SPARC, MDK, PAPP, ADIPOQ, SCGB1A1, TYMS                                                                                                                                                                                             |
| Trophoblast Giant Cell Differentiation                                           | 0.034973286 | 5.437377838 | PLK4, GJB5, E2F7, E2F8                                                                                                                                                                                                                              |
| Positive Regulation of Epithelial Cell Proliferation                             | 0.035259736 | 2.575600028 | OSR1, WNT5A, TWIST1, GAS1, IGF1, SOX9, NODAL, TBX18                                                                                                                                                                                                 |
| Response to Nicotine                                                             | 0.035533216 | 3.262426703 | DHFR, NTRK1, EDN1, LYPD1, HMOX1, ABAT                                                                                                                                                                                                               |
| Cellular Response to Ionizing Radiation                                          | 0.03612815  | 3.946483915 | RAD51AP1, BLM, RAD51, FIGNL1, ECT2                                                                                                                                                                                                                  |
| One-Carbon Metabolic Process                                                     | 0.03612815  | 3.946483915 | DHFR, CAR3, CAR13, CAR6, ALDH1L2                                                                                                                                                                                                                    |
| Proteolysis                                                                      | 0.036506684 | 1.429413762 | CFD, TPSB2, MYRF, MCPT4, CFI, ADAMTS12, MMP23, ADAMTS4, ADAMTS16, UCHL1, ADAM28, ADAMTS2, C1S1, CAPN6, ADAMTS19, CTSK, CLCA2, CPXM1, TPSAB1, ADAMTS7, CMA1, MMP2, ECEL1, PRSS35, MMP10, MMP14, MMP13, ESPL1, PAPP, ADAM12, MMP19, PRTN3, CFB, PAPP2 |

|                                                                              |             |             |                                                                                                                                                                                                                      |
|------------------------------------------------------------------------------|-------------|-------------|----------------------------------------------------------------------------------------------------------------------------------------------------------------------------------------------------------------------|
| Positive Regulation of Cell Proliferation                                    | 0.037356911 | 1.44461699  | SHC4, COL18A1, TNC, KIF14, PTN, FOXM1, CDC20, ESM1, HAS2, SOX9, TIMP1, FGFBP1, EDN1, WNT5A, CLEC11A, FN1, CDC7, IGF1, AGT, FABP1, ACER2, ALDH3A1, MLXIPL, CENPF, FABP4, PRC1, GAS1, PGR, CD248, KIF20B, FOLR2, NODAL |
| Cellular Response to UV                                                      | 0.038578796 | 3.191504383 | DDIAS, PBK, TRP73, PTN, BCAT1, AURKB                                                                                                                                                                                 |
| Positive Regulation of DNA-Directed DNA Polymerase Activity                  | 0.039550273 | 9.175575101 | RFC4, DSCC1, CHTF18                                                                                                                                                                                                  |
| Attachment of Mitotic Spindle Microtubules to Kinetochore                    | 0.039550273 | 9.175575101 | CENPE, KIF2C, NDC80                                                                                                                                                                                                  |
| Astrocyte Cell Migration                                                     | 0.039550273 | 9.175575101 | CCL12, MMP14, CCL2                                                                                                                                                                                                   |
| Cerebellar Cortex Development                                                | 0.039550273 | 9.175575101 | KIF14, DIXDC1, EZH2                                                                                                                                                                                                  |
| Heart Development                                                            | 0.039676611 | 1.687462088 | EDN1, SPARC, DNAH5, MMP2, OSR1, DAW1, FOXJ1, PTN, CENPF, VCAN, COL3A1, MMP13, WT1, SOX9, ZFPM2, DRC1, NODAL, FBN1                                                                                                    |
| Positive Regulation of Mitotic Cell Cycle                                    | 0.040002162 | 3.823156292 | FOXA1, CCNB1, CDK1, BIRC5, BRCA2                                                                                                                                                                                     |
| Regulation of Blood Pressure                                                 | 0.040286262 | 2.76253874  | AOC3, CALCA, EDN1, COL1A2, C3AR1, HMOX1, AGT                                                                                                                                                                         |
| Oocyte Maturation                                                            | 0.040305423 | 5.151200057 | CCNB1, FBXO5, TRIP13, BRCA2                                                                                                                                                                                          |
| Osteoblast Differentiation                                                   | 0.041634336 | 2.165327458 | COL1A1, VCAN, FIGLN1, IGFBP3, COL6A1, TNC, SPP1, TWIST1, SOX8, IGF1                                                                                                                                                  |
| Ossification                                                                 | 0.042407478 | 2.293893775 | MMP14, SPARC, COL11A1, COL5A2, ALOX15, SPP1, TWIST1, SOX9, PTN                                                                                                                                                       |
| Regulation of Neuron Apoptotic Process                                       | 0.044103101 | 3.707303071 | GABRB3, EGLN3, KIF14, TRP73, FAIM2                                                                                                                                                                                   |
| Positive Regulation of Smooth Muscle Cell Proliferation                      | 0.044674869 | 2.446820027 | EDN1, ORC1, C3AR1, HMOX1, IGF1, SKP2, PPARGC1A, WISP1                                                                                                                                                                |
| Positive Regulation of ERK1 and ERK2 Cascade                                 | 0.044840304 | 1.82210002  | NTRK1, CCL24, NDRG4, CCL12, CCL11, ALOX15, TREM2, ADRA1A, CCL9, CCL8, CCL7, CCL2, FGF23, NODAL                                                                                                                       |
| DNA Metabolic Process                                                        | 0.046022374 | 4.893640054 | TOP2A, RAD51, TK1, MKI67                                                                                                                                                                                             |
| Retinal Ganglion Cell Axon Guidance                                          | 0.046022374 | 4.893640054 | NRCAM, EPHB2, EFNA5, EPHB1                                                                                                                                                                                           |
| Stem Cell Differentiation                                                    | 0.048430684 | 3.598264746 | SHC4, OSR1, A2M, ETV4, PHF19                                                                                                                                                                                         |
| Oligodendrocyte Differentiation                                              | 0.048430684 | 3.598264746 | CDKN2C, MYRF, SOX8, SOX9, BOK                                                                                                                                                                                        |
| Brown Fat Cell Differentiation                                               | 0.048430684 | 3.598264746 | MRAP, FABP4, ADIPOQ, UCP1, EBF2                                                                                                                                                                                      |
| toxin Metabolic Process                                                      | 0.049499272 | 8.156066757 | CYP1A1, FMO1, CYP1B1                                                                                                                                                                                                 |
| Regulation of Chromosome Segregation                                         | 0.049499272 | 8.156066757 | KIF2C, MKI67, BUB1                                                                                                                                                                                                   |
| Bone Trabecula Formation                                                     | 0.049499272 | 8.156066757 | FBN2, COL1A1, MMP2                                                                                                                                                                                                   |
| Negative Regulation of Histone Acetylation                                   | 0.049499272 | 8.156066757 | MSX3, TWIST1, BRCA1                                                                                                                                                                                                  |
| Positive Regulation of Exit From Mitosis                                     | 0.049499272 | 8.156066757 | UBE2C, CDCA5, BIRC5                                                                                                                                                                                                  |
| Negative Regulation of Peptidase Activity                                    | 0.050054615 | 2.091299168 | ITIH5, WFDC8, SERPINB2, CD109, BIRC5, BC048546, CST9, TIMP1, A2M, NAIP1                                                                                                                                              |
| Protein Complex Assembly                                                     | 0.052066615 | 2.59511215  | CCNB1, GMNN, CDK1, SOX9, PF4, CLGN, ADD2                                                                                                                                                                             |
| Response to X-Ray                                                            | 0.052116053 | 4.660609575 | BLM, RAD51, TRP73, BRCA2                                                                                                                                                                                             |
| Determination of Adult Lifespan                                              | 0.052116053 | 4.660609575 | MEG3, ANKLE1, RAD54L, RAD54B                                                                                                                                                                                         |
| Placenta Development                                                         | 0.052314903 | 2.936184032 | GJB3, CCNF, E2F7, NODAL, DCN, E2F8                                                                                                                                                                                   |
| Negative Regulation of Blood Pressure                                        | 0.052984033 | 3.495457182 | CALCA, PMCH, ADIPOQ, BDKRB1, ABAT                                                                                                                                                                                    |
| Regulation of Heart Rate                                                     | 0.057761704 | 3.398361149 | RYR2, CALCA, PMCH, AGT, CACNA1G                                                                                                                                                                                      |
| Positive Regulation of Leukocyte Migration                                   | 0.058577083 | 4.448763686 | AOC3, CCL12, CCL2, BDKRB1                                                                                                                                                                                            |
| Cell-Cell Signaling                                                          | 0.059674383 | 2.137998082 | FGFBP1, EDN1, WNT5A, CXCL13, CCR5, ADRA1A, WISP1, ADRA2A, WNT4                                                                                                                                                       |
| Heterophilic Cell-Cell Adhesion via Plasma Membrane Cell Adhesion Molecules  | 0.060122722 | 2.823253877 | LGALS1, CADM4, TENM3, CDH2, GM609, LGALS7                                                                                                                                                                            |
| Nucleotide Biosynthetic Process                                              | 0.06023609  | 7.340460081 | DHFR, DCTD, TYMS                                                                                                                                                                                                     |
| Cellular Response to Vitamin D                                               | 0.06023609  | 7.340460081 | TNC, PTN, FGF23                                                                                                                                                                                                      |
| Nucleosome Assembly                                                          | 0.062454544 | 2.117440408 | CHAF1B, CHAF1A, H1FX, PADI4, SOX9, CENPA, HIST1H1B, MCM2, ASF1B                                                                                                                                                      |
| Positive Regulation of Bone Mineralization                                   | 0.062761717 | 3.30651355  | FBN2, OSR1, FAM20C, CD276, WNT4                                                                                                                                                                                      |
| Base-Excision Repair                                                         | 0.062761717 | 3.30651355  | POLQ, NEIL3, FEN1, LIG1, UNG                                                                                                                                                                                         |
| Positive Regulation of Mesenchymal Cell Proliferation                        | 0.062761717 | 3.30651355  | WNT5A, PRRX2, GAS1, SOX9, TBX18                                                                                                                                                                                      |
| Positive Regulation of Cardiac Muscle Cell Proliferation                     | 0.065394973 | 4.255339178 | CCNB1, CDK1, NCAM1, ZFPM2                                                                                                                                                                                            |
| Cochlea Morphogenesis                                                        | 0.065394973 | 4.255339178 | WNT5A, SOX9, TBX18, CTHRC1                                                                                                                                                                                           |
| Negative Regulation of Smooth Muscle Cell Proliferation                      | 0.067981582 | 3.219500036 | NDRG4, IGFBP3, ADIPOQ, HMOX1, PPARGC1A                                                                                                                                                                               |
| Protein Kinase B Signaling                                                   | 0.067981582 | 3.219500036 | LINGO1, CCL12, CCL2, IGF1, SOX9                                                                                                                                                                                      |
| Intrinsic Apoptotic Signaling Pathway In Response to DNA Damage              | 0.068556158 | 2.718688919 | CHEK2, E2F1, HMOX1, BRCA1, BRCA2, BOK                                                                                                                                                                                |
| Cellular Response to Glucose Stimulus                                        | 0.069459154 | 2.412357773 | MLXIPL, LGALS1, CMA1, SERPINF1, AQP4, IGF1, PPARGC1A                                                                                                                                                                 |
| Regulation of Cellular Protein Localization                                  | 0.071680036 | 6.673145528 | CCNE2, CCNE1, WNT5A                                                                                                                                                                                                  |
| Negative Regulation of Immune Response                                       | 0.071680036 | 6.673145528 | FCRLB, COL3A1, FCGR2B                                                                                                                                                                                                |
| Positive Regulation of Insulin-Like Growth Factor Receptor Signaling Pathway | 0.071680036 | 6.673145528 | CDH3, IGFBP3, IGF1                                                                                                                                                                                                   |
| Skin Morphogenesis                                                           | 0.071680036 | 6.673145528 | COL1A1, ERRF1, COL1A2                                                                                                                                                                                                |

|                                                                                |             |             |                                                                                                                                                         |
|--------------------------------------------------------------------------------|-------------|-------------|---------------------------------------------------------------------------------------------------------------------------------------------------------|
| Hepatocyte Differentiation                                                     | 0.071680036 | 6.673145528 | CYP1A1, E2F7, E2F8                                                                                                                                      |
| Telomere Maintenance via Recombination                                         | 0.071680036 | 6.673145528 | RAD51, RAD51C, BRCA2                                                                                                                                    |
| Negative Regulation of Tumor Necrosis Factor-Mediated Signaling Pathway        | 0.071680036 | 6.673145528 | ADIPOQ, NR1H4, TRAIIP                                                                                                                                   |
| Cellular Response to Gamma Radiation                                           | 0.07255827  | 4.078033378 | RAD51, DDIAS, CHEK2, H2AFX                                                                                                                              |
| Middle Ear Morphogenesis                                                       | 0.07255827  | 4.078033378 | EDN1, OSR1, PRRX2, GAS1                                                                                                                                 |
| Anatomical Structure Formation Involved In Morphogenesis                       | 0.07255827  | 4.078033378 | FOXA1, LHX2, NODAL, TBX18                                                                                                                               |
| Complement Activation, Classical Pathway                                       | 0.07300579  | 2.669258211 | C1QB, C1QA, C1S1, CFI, HC, C1QC                                                                                                                         |
| Cell Fate Commitment                                                           | 0.073295304 | 2.378852804 | WNT5A, GAS1, SOX8, ROR2, SOX9, NODAL, WNT4                                                                                                              |
| Embryonic Cranial Skeleton Morphogenesis                                       | 0.073418328 | 3.136948753 | MMP14, PRRX2, TWIST1, GAS1, NODAL                                                                                                                       |
| Regulation of Signal Transduction                                              | 0.079068535 | 3.058525034 | CDH2, 2810408A11RIK, BIRC5, NAIP1, NODAL                                                                                                                |
| Positive Regulation of DNA Endoreduplication                                   | 0.079964515 | 24.46820027 | E2F7, E2F8                                                                                                                                              |
| Actomyosin Contractile Ring Assembly                                           | 0.079964515 | 24.46820027 | RACGAP1, KIF23                                                                                                                                          |
| Negative Regulation of Endodermal Cell Differentiation                         | 0.079964515 | 24.46820027 | COL5A1, COL5A2                                                                                                                                          |
| Ureter Urothelium Development                                                  | 0.079964515 | 24.46820027 | OSR1, SOX9                                                                                                                                              |
| Sequestering of TGFbeta In Extracellular Matrix                                | 0.079964515 | 24.46820027 | FBN2, FBN1                                                                                                                                              |
| Minus-End-Directed Vesicle Transport Along Microtubule                         | 0.079964515 | 24.46820027 | KIFC1, KIFC5B                                                                                                                                           |
| Spindle Assembly Involved In Female Meiosis I                                  | 0.079964515 | 24.46820027 | FBXO5, AURKA                                                                                                                                            |
| Centrosome Separation                                                          | 0.079964515 | 24.46820027 | NEK2, CNTROB                                                                                                                                            |
| Dump Biosynthetic Process                                                      | 0.079964515 | 24.46820027 | DCTD, DUT                                                                                                                                               |
| Mitotic Recombination-Dependent Replication Fork Processing                    | 0.079964515 | 24.46820027 | RAD51, BRCA2                                                                                                                                            |
| Posterior Mesonephric Tubule Development                                       | 0.079964515 | 24.46820027 | WT1, OSR1                                                                                                                                               |
| Establishment of Mitotic Spindle Orientation                                   | 0.080054708 | 3.914912043 | INSC, SPD11, CENPA, NDC80                                                                                                                               |
| Positive Regulation of Cytosolic Calcium Ion Concentration                     | 0.081559448 | 1.818582453 | EDN1, PTGER3, PMCH, C3AR1, CXCL1, CXCL13, CCR5, CXCL3, ADRA1A, AGT, CACNA1G                                                                             |
| Cellular Response to Hydrogen Peroxide                                         | 0.082365321 | 2.575600028 | FABP1, ARG1, CDK1, CYP1B1, ECT2, EZH2                                                                                                                   |
| Inner Dynein Arm Assembly                                                      | 0.083755675 | 6.117050068 | LRRC6, ZMYND10, CCDC40                                                                                                                                  |
| Mesonephros Development                                                        | 0.083755675 | 6.117050068 | WT1, OSR1, WNT4                                                                                                                                         |
| Positive Regulation of Cell Growth Involved In Cardiac Muscle Cell Development | 0.083755675 | 6.117050068 | EDN1, IGF1, WISP1                                                                                                                                       |
| Lung Epithelial Cell Differentiation                                           | 0.083755675 | 6.117050068 | FOXA1, INSC, SOX9                                                                                                                                       |
| Nucleoside Triphosphate Biosynthetic Process                                   | 0.083755675 | 6.117050068 | NME4, AK5, AK7                                                                                                                                          |
| Regulation of G2/M Transition of Mitotic Cell Cycle                            | 0.083755675 | 6.117050068 | CCNA2, CENPF, KIF14                                                                                                                                     |
| Central Nervous System Projection Neuron Axonogenesis                          | 0.083755675 | 6.117050068 | EPHB2, EPHB1, DCLK1                                                                                                                                     |
| Skin Development                                                               | 0.087272288 | 2.531193131 | COL1A1, ADAMTS2, COL3A1, COL5A1, GJB3, COL5A2                                                                                                           |
| Mitophagy In Response to Mitochondrial Depolarization                          | 0.091174008 | 1.853651536 | FABP1, FGFBP1, CALCA, CHAF1B, CALCB, SNTG1, KRT15, HC, HAPLN1, ADAMTS7                                                                                  |
| Meiotic Cell Cycle                                                             | 0.093397043 | 2.060480023 | CCNA1, RSPH1, EXO1, H2AFX, NEK2, TRIP13, CLGN, AURKA                                                                                                    |
| Nervous System Development                                                     | 0.093627566 | 1.427852536 | NTRK1, SRRM4, NRN1, D130043K22RIK, CRMP1, GFRA1, IGF1, EFNA5, DCLK1, CIT, CDC20, DCDC2A, LHX2, CHL1, DPF1, INSC, STMN1, ECT2, EPHB2, EPHB1, DBN1, NODAL |
| Response to Hypoxia                                                            | 0.094858812 | 1.65670106  | RYR2, EDN1, EGLN3, MMP2, ADIPOQ, ABAT, LOXL2, ALDH3A1, MMP14, CYP1A1, TACC3, HMOX1, CCL2                                                                |
| Odontogenesis                                                                  | 0.09599465  | 3.624918559 | OSR1, TWIST1, GAS1, INHBA                                                                                                                               |
| Fatty Acid Homeostasis                                                         | 0.096392539 | 5.646507755 | MLXIPL, NR1H4, APOE                                                                                                                                     |
| Hyaluronan Metabolic Process                                                   | 0.096392539 | 5.646507755 | ITIHS, HAS2, MKI67                                                                                                                                      |
| Short-Term Memory                                                              | 0.096392539 | 5.646507755 | BRINP1, MDK, SERPINF1                                                                                                                                   |
| Somatic Hypermutation of Immunoglobulin Genes                                  | 0.096392539 | 5.646507755 | POLQ, EXO1, UNG                                                                                                                                         |
| Negative Regulation of JAK-STAT Cascade                                        | 0.097259589 | 2.845139566 | LRRC15, FLRT2, NYX, ASPN, DCN                                                                                                                           |
| Peptidyl-Threonine Phosphorylation                                             | 0.097259589 | 2.845139566 | OSR1, CHEK1, PBK, CDK1, TTK                                                                                                                             |
| Microtubule Cytoskeleton Organization                                          | 0.097407459 | 2.039016689 | WEE1, GAS2L3, PRC1, TACC3, NUSAP1, CRMP1, BIRC5, AURKA                                                                                                  |
