# Supplementary material for: Inhibition of angiogenesis and regenerative lung growth in Lepob/ob mice through adiponectin-VEGF/VEGFR2 signaling
Source: PubMed Central journal article supplement (PMC11521822; doi:10.3389/fcvm.2024.1491971), 2024-10-16
Supplement: Datasheet4.pdf [file Datasheet4.pdf]

| Biological Processes                                         | PValue     | Fold Enrichment | Genes                                                                                                                                                                                                                                                                                                                                                                                                                                                                                                                                                                                                                                                                                                                                                                                                                         |
|--------------------------------------------------------------|------------|-----------------|-------------------------------------------------------------------------------------------------------------------------------------------------------------------------------------------------------------------------------------------------------------------------------------------------------------------------------------------------------------------------------------------------------------------------------------------------------------------------------------------------------------------------------------------------------------------------------------------------------------------------------------------------------------------------------------------------------------------------------------------------------------------------------------------------------------------------------|
| Cell Cycle                                                   | 2.5868E-52 | 4.98131113      | ERCC6L, ZWILCH, DSCC1, GMNN, CCNF, DIXDC1, BUB1B, MKI67, SMC2, CDC20, CHEK2, CHEK1, NUSAP1, RCC1, NEK2, OIP5, KNTC1, FBXO5, BORA, LIG1, TRP73, ESCO2, CDC25C, KLNSTRN, MELK, CCNE2, CCNE1, FANCD2, FAM64A, KIF20B, CDCA2, CDCA3, CDCA5, CDCA8, PKMYT1, SKA3, PMF1, NCAPH, SKA1, SKA2, CCNB2, DSN1, CCNB1, BRINP1, RACGAP1, CLSPN, ECT2, FAM83D, CDT1, UBE2C, DDIAS, PLK1, CDC7, CDC6, NDC80, ANLN, TPX2, KIF18B, UBE2S, CDK1, CNTR0B, MCM7, MCM8, NCAPG2, BRCA1, KIF11, CHTF18, FOXM1, BRCA2, CKS1B, SMPD3, CHAF1B, CHAF1A, SGOL1, MIS18BP1, GSG2, NUF2, MYBL2, SPD1L, DLGAP5, CEP55, HELLS, H2AFX, CKAP2, KIF23, MASTL, CCSAP, CIT, CCNA2, ASPM, CCNA1, DBF4, PSCR1, INCENP, MCM3, CKS2, BIRC5, GAS1, MCM5, KIF2C, MCM6, MCM2, UHRF1, NSL1, AURKB, AURKA, CDC45, E2F1, BUB1, E2F7, E2F8, CENPW, CDKN2C, SPAG5, TICRR, CENPE, |
| DNA Replication                                              | 2.0729E-20 | 7.162424469     | PIF1, FEN1, BLM, 2810417H13RIK, MCM7, MCM8, PRIM1, DSCC1, MCM10, BRCA1, CHTF18, CHAF1B, CDC45, CHAF1A, ORC1, POLE, GINS1, POLO, GINS2, CDT1, RMI2, RRM1, RRM2, RFC4, LIG1, CDC6, ADRA2A, TICRR, POLA1, DBF4, POLE2, MCM3, MCM5, MCM6, DTL, MCM2                                                                                                                                                                                                                                                                                                                                                                                                                                                                                                                                                                               |
| Chromosome Segregation                                       | 7.0773E-18 | 7.972784358     | TOP2A, CDCA2, BRCA1, KIF11, SKA3, PMF1, NSL1, SKA1, SKA2, DSN1, SGOL1, RCC1, NEK2, OIP5, BUB1, CENPW, SPAG5, ESCO2, KLNSTRN, NDC80, CENPE, CENPF, ESPL1, CENPH, INCENP, BIRC5, KIF2C, CENPN, SPC25                                                                                                                                                                                                                                                                                                                                                                                                                                                                                                                                                                                                                            |
| Cellular Response to DNA Damage Stimulus                     | 1.1637E-10 | 2.854623365     | TOP2A, FEN1, MCM7, MCM8, MCM10, BRCA1, FOXM1, BRCA2, PIDD1, CHAF1B, CHAF1A, EXO1, CHEK2, CHEK1, POLE, GEN1, LIG1, H2AFX, TRP73, MASTL, MMS22L, NEIL3, RAD51C, FANCD2, SPATA18, DTL, PIF1, 2810417H13RIK, BLM, PARPBP, UHRF1, UNG, RAD54B, RAD51AP1, BRIP1, RAD54L, CLSPN, E2F7, ZRANB3, BARD1, POLO, EGLN3, ATAD5, DDIAS, TICRR, RAD51, APITD1, UBE2T, CDKN3                                                                                                                                                                                                                                                                                                                                                                                                                                                                  |
| DNA Repair                                                   | 3.2633E-08 | 2.846928962     | PIF1, FEN1, BLM, 2810417H13RIK, ANKLE1, PARPBP, MCM8, UHRF1, BRCA1, FOXM1, BRCA2, UNG, RAD51AP1, BRIP1, CHAF1B, CHAF1A, EXO1, CHEK2, CHEK1, RAD54L, CLSPN, POLE, ZRANB3, GEN1, BARD1, POLO, LIG1, H2AFX, KIF22, TICRR, MMS22L, NEIL3, RAD51C, RAD51, APITD1, FANCD2, UBE2T                                                                                                                                                                                                                                                                                                                                                                                                                                                                                                                                                    |
| Chemokine-Mediated Signaling Pathway                         | 2.3318E-07 | 6.22826916      | CCL24, CCL12, CCL11, CXCL3, CXCL13, CXCL5, CXCL8, CCL7, CCR9, CCL2, ACKR1, PF4                                                                                                                                                                                                                                                                                                                                                                                                                                                                                                                                                                                                                                                                                                                                                |
| Cellular Response to Tumor Necrosis Factor                   | 4.7248E-07 | 4.226325501     | CCL24, CCL12, EDN1, CALCA, CCL11, BRCA1, ADAMTS12, COL1A1, CCL9, CCL8, FABP4, CCL7, OCSTAMP, CCL2, HAS2, PCK1, PPARGC1A, DBN1, ADAMTS7                                                                                                                                                                                                                                                                                                                                                                                                                                                                                                                                                                                                                                                                                        |
| Cellular Response to Interleukin-1                           | 3.8958E-06 | 4.587787551     | CCL24, CCL12, EDN1, CCL11, SAA3, FN1, ADAMTS12, CCL9, CCL8, CCL7, CCL2, HAS2, SOX9, PCK1, ADAMTS7                                                                                                                                                                                                                                                                                                                                                                                                                                                                                                                                                                                                                                                                                                                             |
| Double-Strand Break Repair via Homologous Recombination      | 1.74E-05   | 4.67744169      | GEN1, BLM, MCM8, H2AFX, TONS1, BRCA1, BRCA2, RAD54B, RAD51AP1, MMS22L, RAD51, RAD51C, RAD54L                                                                                                                                                                                                                                                                                                                                                                                                                                                                                                                                                                                                                                                                                                                                  |
| Chemotaxis                                                   | 2.4136E-05 | 3.5250797       | CCL24, CCL12, CCL11, HMGB2, CXCR5, CXCL3, CXCL13, CXCL5, CCL9, CCL8, CCL7, CCR9, C3AR1, CCL2, CCR5, CCR3, PF4                                                                                                                                                                                                                                                                                                                                                                                                                                                                                                                                                                                                                                                                                                                 |
| Collagen Catabolic Process                                   | 3.4529E-05 | 8.156066757     | ADAMTS2, MMP14, MMP13, CTSK, MMP2, MMP19, PRTN3, MMP10                                                                                                                                                                                                                                                                                                                                                                                                                                                                                                                                                                                                                                                                                                                                                                        |
| Aging                                                        | 8.6264E-05 | 2.828693673     | NTRK1, CALCA, ARG1, SERPINF1, ABAT, TYMS, ADRA1A, AURKB, AGT, DCN, ALDH3A1, COL3A1, KRT14, CYP11A1, CCL2, NCAM1, TIMP1, APOE, PCK1, PPARGC1A                                                                                                                                                                                                                                                                                                                                                                                                                                                                                                                                                                                                                                                                                  |
| Cytokinesis                                                  | 9.9936E-05 | 5.95172439      | PSCR1, INCENP, PLK1, BIRC5, KIF23, KIF20A, ECT2, BRCA2, CIT                                                                                                                                                                                                                                                                                                                                                                                                                                                                                                                                                                                                                                                                                                                                                                   |
| Cell Activation                                              | 0.00016445 | 10.48637154     | LYPD1, FN1, LYPD2, IGF1, TIMP1, SLURP1                                                                                                                                                                                                                                                                                                                                                                                                                                                                                                                                                                                                                                                                                                                                                                                        |
| Inflammatory Response                                        | 0.00019011 | 2.133854675     | CCL12, TPSB2, CALCA, CCL11, CD5L, HMGB2, CXCL1, REG3G, CXCL3, CXCL13, CXCL5, CCL9, CYP26B1, CCL8, CCL7, SPP1, C3AR1, CCL2, BDKRB1, CCR5, CCR3, CCL24, CD163, NR1H4, TRP73, CHIL3, HC, ACKR1, CHIL4, PF4                                                                                                                                                                                                                                                                                                                                                                                                                                                                                                                                                                                                                       |
| Cellular Response to Retinoic Acid                           | 0.00028292 | 4.140772353     | COL1A1, CYP26A1, CYP26B1, BRINP1, TESC, SERPINF1, OSR1, TNC, CCL2, SOX9, PCK1                                                                                                                                                                                                                                                                                                                                                                                                                                                                                                                                                                                                                                                                                                                                                 |
| Response to Drug                                             | 0.00034446 | 2.093149876     | INHBA, COL1A1, ALDH3A1, RAD51, SCGB1A1, CYP11A1, CDK1                                                                                                                                                                                                                                                                                                                                                                                                                                                                                                                                                                                                                                                                                                                                                                         |
| Cellular Response to Interferon-Gamma                        | 0.0004117  | 3.95809122      | CCL24, CCL9, CCL12, EDN1, CCL8, CCL11, GBP10, CCL7, WNT5A, CCL2, AQP4                                                                                                                                                                                                                                                                                                                                                                                                                                                                                                                                                                                                                                                                                                                                                         |
| Eosinophil Chemotaxis                                        | 0.00047459 | 12.23410014     | CCL24, CCL11, CCL7, CCL2, CCR3                                                                                                                                                                                                                                                                                                                                                                                                                                                                                                                                                                                                                                                                                                                                                                                                |
| Endodermal Cell Differentiation                              | 0.00064253 | 6.343607478     | MMP14, COL11A1, MMP2, COL6A1, FN1, INHBA, NODAL                                                                                                                                                                                                                                                                                                                                                                                                                                                                                                                                                                                                                                                                                                                                                                               |
| Male Gonad Development                                       | 0.00064527 | 3.058525034     | RRM1, TESC, WNT5A, HMGB2, LRRG6, INHBA, ASPM, MMP14, BRIP1, WTI, SOX8, SOX9, WNT4, BOK                                                                                                                                                                                                                                                                                                                                                                                                                                                                                                                                                                                                                                                                                                                                        |
| DNA Recombination                                            | 0.0006617  | 3.454334156     | RAD51AP1, PIF1, BLM, RAD51, RAD51C, LIG1, EXO1, H2AFX, HMGB2, BRCA1, BRCA2, RAG1                                                                                                                                                                                                                                                                                                                                                                                                                                                                                                                                                                                                                                                                                                                                              |
| Spermatogenesis                                              | 0.0006725  | 1.923789702     | LRGUK, HMGB2, BRCA2, CHTF18, AK7, C330027C09RIK, CLGN, BRIP1, ADAMTS2, CCNB1, CYP26B1, RACGAP1, E2F1, 1110017D15RIK, SOX8, SOX9, TSNAXIP1, CCDC33, TCP11, RPL39L, NDC1, H2AFX, NME5, CDC25C, CIT, CCNA1, ASPM, RAD51C, WTI, MYCBPAP, TRIP13, SPATA18                                                                                                                                                                                                                                                                                                                                                                                                                                                                                                                                                                          |
| Cell Proliferation                                           | 0.00071284 | 2.335600935     | MCM7, UHRF1, MCM10, IGF1, MKI67, BRCA2, AURKB, CKS1B, POLA1, UCHL1, MELK, CKS2, CYP11A1, CDK1, TACC3, FAM83D, BUB1, TSPAN1, CFB, E2F8, BOK                                                                                                                                                                                                                                                                                                                                                                                                                                                                                                                                                                                                                                                                                    |
| Extracellular Matrix Organization                            | 0.00076401 | 3.0048667       | VIT, COL18A1, OLFML2B, LAMA1, ELN, FN1, NID2, AGT, CCDC80, COL5A3, ADAMTS12, COL6A4, VWA1, SOX9                                                                                                                                                                                                                                                                                                                                                                                                                                                                                                                                                                                                                                                                                                                               |
| Protein Phosphorylation                                      | 0.00076859 | 1.741660089     | LAMA1, BUB1B, TTK, MST1R, PKMYT1, AURKB, AURKA, CCNB1, STK33, CHEK2, GSG2, CHEK1, P8K, NEK2, EPHB2, BUB1, EPHB1, PLK4, NTRK1, CDK4, NEK5, IGF1BP3, PLK1, WNT5A, CDC7, PASK, MASTL, MAPK15, DCLK1, CIT, MAPK10, WEE1, MELK, CCNE1, MAP3K19, CDK1, BIRC5, FAM20C, ROR2, CAMK1G, NEK11                                                                                                                                                                                                                                                                                                                                                                                                                                                                                                                                           |
| Positive Regulation of Inflammatory Response                 | 0.00098299 | 3.883841313     | CCL24, CCL9, CCL12, CCL8, CCL11, FABP4, CCL7, WNT5A, CCL2, CCR5                                                                                                                                                                                                                                                                                                                                                                                                                                                                                                                                                                                                                                                                                                                                                               |
| Monocyte Chemotaxis                                          | 0.00105388 | 4.893640054     | CCL24, CCL9, CCL12, CALCA, CCL8, CCL11, CCL7, CCL2                                                                                                                                                                                                                                                                                                                                                                                                                                                                                                                                                                                                                                                                                                                                                                            |
| G2 DNA Damage Checkpoint                                     | 0.00131787 | 6.990914363     | PLK1, CHEK1, CLSPN, BRCA1, DTL, NEK11                                                                                                                                                                                                                                                                                                                                                                                                                                                                                                                                                                                                                                                                                                                                                                                         |
| Neutrophil Chemotaxis                                        | 0.00189506 | 3.546115981     | CCL24, CCL9, CCL12, CCL8, CCL11, CCL7, SPP1, CCL2, CCL1, CXCL3                                                                                                                                                                                                                                                                                                                                                                                                                                                                                                                                                                                                                                                                                                                                                                |
| Lymphocyte Chemotaxis                                        | 0.00195245 | 5.1902243       | CCL24, CCL9, CCL12, CCL8, CCL11, CCL7, CCL2                                                                                                                                                                                                                                                                                                                                                                                                                                                                                                                                                                                                                                                                                                                                                                                   |
| Cellular Response to Platelet-Derived Growth Factor Stimulus | 0.00203681 | 6.383008766     | CCNA2, ERFF1, HAS1, CCL2, HAS2, PTN                                                                                                                                                                                                                                                                                                                                                                                                                                                                                                                                                                                                                                                                                                                                                                                           |
| Positive Regulation of Transcription, DNA-Templated          | 0.00254927 | 1.65670106      | MEG3, BLM, MYRF, HMGB2, BRCA1, FOXM1, BRCA2, CKS1B, MDK, CHEK2, E2F1, SOX8, SOX9, PPARGC1A, FGF23, WNT4, TESC, ATAD2, WNT5A, TRP73, EBF2, EBF3, IGF1, INHBA, GDF6, KLF15, ETV4, AGT, CCNA2, COL1A1, MLXIP1, PSCR1, WTI, LHX2, CKS2, NFE2L3, PGR, ROR2, ZFPM2                                                                                                                                                                                                                                                                                                                                                                                                                                                                                                                                                                  |
| Response to Lipopolysaccharide                               | 0.00300541 | 2.235673121     | SPON2, EDN1, WFDC21, SPARC, PTGER3, HMGB2, FMO1, CXCL1, CXCL3, CXCL13, LOXL1, CXCL5, DCN, SCGB1A1, CYP11A1, BDKRB1, PCK1, PF4                                                                                                                                                                                                                                                                                                                                                                                                                                                                                                                                                                                                                                                                                                 |
| Cellular Response to Hypoxia                                 | 0.00319676 | 2.850664109     | FABP1, CCNA2, CCNB1, EDN1, FNDC1, E2F1, TWIST1, HMOX1, PTN, PCK1, PPARGC1A, KCN2                                                                                                                                                                                                                                                                                                                                                                                                                                                                                                                                                                                                                                                                                                                                              |
| Maternal Process Involved In Parturition                     | 0.0032506  | 12.23410014     | EDN1, CYP11A1, CCL2, NODAL                                                                                                                                                                                                                                                                                                                                                                                                                                                                                                                                                                                                                                                                                                                                                                                                    |
| Response to Activity                                         | 0.00353717 | 3.994808207     | NTRK1, EDN1, ADIPOQ, CDK1, CCL2, PTN, PCK1, PPARGC1A                                                                                                                                                                                                                                                                                                                                                                                                                                                                                                                                                                                                                                                                                                                                                                          |
| ERK1 and ERK2 Cascade                                        | 0.00359888 | 5.646507755     | CCL11, IGF1, SOX9, IQGAP3, CCR3, AGT                                                                                                                                                                                                                                                                                                                                                                                                                                                                                                                                                                                                                                                                                                                                                                                          |
| Response to Mechanical Stimulus                              | 0.00395037 | 3.495457182     | COL3A1, MMP14, CCNB1, MMP2, TNC, CCL2, BDKRB1, KCN2, DCN                                                                                                                                                                                                                                                                                                                                                                                                                                                                                                                                                                                                                                                                                                                                                                      |
| Double-Strand Break Repair                                   | 0.00395037 | 3.495457182     | POLO, LIG1, CHEK2, CDCA5, RAD54L, TRIP13, ESCO2, BRCA1, BRCA2                                                                                                                                                                                                                                                                                                                                                                                                                                                                                                                                                                                                                                                                                                                                                                 |
| Immune Response                                              | 0.00400049 | 1.97904561      | H2-EB2, CCL24, CCL12, CCL11, CMA1, MCPT4, CXCR5, CXCL1, PRG4, CXCL3, CXCL13, CXCL5, VPREB3, CCL9, CCL8, CCL7, CCR9, CCL2, ENPP3, CCR5, FCGR2B, PF4                                                                                                                                                                                                                                                                                                                                                                                                                                                                                                                                                                                                                                                                            |
| Positive Regulation of Cell Migration                        | 0.00408404 | 2.169594113     | COL18A1, LRRC15, CCL24, EDN1, CEMIP, CCL11, TNFAIP6, MMP2, ARHGAP39, FN1, IGF1, ADRA2A, COL1A1, MMP14, FAM110C, C3AR1, HAS2, ROR2                                                                                                                                                                                                                                                                                                                                                                                                                                                                                                                                                                                                                                                                                             |
| Cell Chemotaxis                                              | 0.00441092 | 3.136948753     | CCL9, CCL12, CCL8, SAA3, HMGB2, CCL2, CXCL1, CXCL13, EPHB1, CXCL5                                                                                                                                                                                                                                                                                                                                                                                                                                                                                                                                                                                                                                                                                                                                                             |
| Protein K6-Linked Ubiquitination                             | 0.00472878 | 10.87475568     | BARD1, UBE2S, UBE2T, BRCA1                                                                                                                                                                                                                                                                                                                                                                                                                                                                                                                                                                                                                                                                                                                                                                                                    |
| Retinal Rod Cell Differentiation                             | 0.00485542 | 24.46820027     | SOX8, SOX9, PTN                                                                                                                                                                                                                                                                                                                                                                                                                                                                                                                                                                                                                                                                                                                                                                                                               |
| Renal Vesicle Induction                                      | 0.00485542 | 24.46820027     | SOX8, SOX9, WNT4                                                                                                                                                                                                                                                                                                                                                                                                                                                                                                                                                                                                                                                                                                                                                                                                              |
| Negative Regulation of Neuron Apoptotic Process              | 0.00596801 | 2.293893775     | GABRB3, NTRK1, CCL12, KIF14, TRP73, FAIM2, AGT, CHL1, MDK, HMOX1, CCL2, BIRC5, APOE, PPARGC1A, BOK                                                                                                                                                                                                                                                                                                                                                                                                                                                                                                                                                                                                                                                                                                                            |
| Regulation of Cell Cycle                                     | 0.0060571  | 2.621592886     | FOXA1, 2810417H13RIK, CCNE2, CCNE1, FIGLN1, CCNF, E2F1, TACC3, MASTL, SKP2, DTL, PRR11                                                                                                                                                                                                                                                                                                                                                                                                                                                                                                                                                                                                                                                                                                                                        |
| Complement Activation, Alternative Pathway                   | 0.006552   | 9.787280108     | CFD, HC, CFP, CFB                                                                                                                                                                                                                                                                                                                                                                                                                                                                                                                                                                                                                                                                                                                                                                                                             |
| Positive Regulation of Gtpase Activity                       | 0.00684686 | 2.346265779     | NTRK1, CCL24, CCL12, CCL11, RGS16, WNT5A, ELMOD1, CCL9, CCL8, CCL7, CCL2, ECT2, EHZ2, WNT4                                                                                                                                                                                                                                                                                                                                                                                                                                                                                                                                                                                                                                                                                                                                    |

- Categories
- Adhesion/Migration
  - Cell Cycle/Apoptosis
  - Inflammatory/Immune Response
  - Cell Signaling
