# Supplementary material for: Inhibition of angiogenesis and regenerative lung growth in Lepob/ob mice through adiponectin-VEGF/VEGFR2 signaling
Source: PubMed Central journal article supplement (PMC11521822; doi:10.3389/fcvm.2024.1491971), 2024-10-16
Supplement: Datasheet5.pdf [file Datasheet5.pdf]

| Biological Processes                             | PValue      | Fold Enrichment | Genes                                                                                                                                                                                                                                                                                                                                                                                                                                                                                                                                                                                                                                                                                                                                                                                                                                                                                                                                      |
|--------------------------------------------------|-------------|-----------------|--------------------------------------------------------------------------------------------------------------------------------------------------------------------------------------------------------------------------------------------------------------------------------------------------------------------------------------------------------------------------------------------------------------------------------------------------------------------------------------------------------------------------------------------------------------------------------------------------------------------------------------------------------------------------------------------------------------------------------------------------------------------------------------------------------------------------------------------------------------------------------------------------------------------------------------------|
| Cell Cycle                                       | 2.58685E-52 | 4.98131113      | ERCC6L, ZWILCH, DSCC1, GMNN, CCNF, DIXDC1, BUB1B, MKI67, SMC2, CDC20, CHEK2, CHEK1, NUSAP1, RCC1, NEK2, OIP5, <b>KNTC1</b> , FBXO5, BORA, LIG1, TRP73, ESCO2, CDC25C, KNSTRN, MELK, <b>CCNE2</b> , CCNE1, FANCD2, FAM64A, KIF20B, CDCA2, CDCA3, CDCA5, CDCA8, PKMYT1, SKA3, PMF1, NCAPH, SKA1, SKA2, CCNB2, DSN1, CCNB1, BRINP1, RACGAP1, CLSPN, ECT2, FAM83D, CDT1, UBE2C, DDIAS, PLK1, CDC7, CDC6, NDC80, ANLN, TPX2, KIF18B, UBE2S, CDK1, CNTR0B, MCM7, MCM8, NCAPG2, BRCA1, KIF11, CHTF18, FOXM1, BRCA2, CKS1B, SMPD3, CHAF1B, CHAF1A, SGOL1, MIS18BP1, GSG2, NUF2, MYBL2, SPDL1, DLGAP5, CEP55, HELLS, H2AFX, CKAP2, KIF23, MASTL, CCSAP, CIT, CCNA2, ASPM, CCNA1, DBF4, PSRC1, INCENP, MCM3, CKS2, <b>BIRC5</b> , GAS1, MCM5, KIF2C, MCM6, MCM2, <b>UHRF1</b> , NSL1, AURKB, AURKA, CDC45, <b>E2F1</b> , BUB1, E2F7, E2F8, CENPW, CDKN2C, SPAG5, TICRR, CENPE, WEE1, APITD1, PRC1, NCAPD2, SPC24, MAD2L1, SPC25, NEK11, <b>CDKN3</b> |
| Cell Division                                    | 9.92865E-41 | 5.691800598     | ERCC6L, ZWILCH, NCAPG2, CCNF, KIF14, BUB1B, KIF11, SMC2, CKS1B, CDC20, SGOL1, MIS18BP1, CHEK2, NUF2, NUSAP1, RCC1, NEK2, OIP5, <b>KNTC1</b> , FBXO5, SPDL1, CEP55, HELLS, BORA, LIG1, KIFC5B, KIF23, MASTL, CDC25C, CCSAP, KNSTRN, CIT, CCNA2, CCNA1, ASPM, PSRC1, <b>CCNE2</b> , KIFC1, CCNE1, INCENP, CKS2, <b>BIRC5</b> , FAM64A, MCM5, KIF2C, KIF20B, CDCA2, CDCA3, CDCA5, CDCA8, SKA3, PMF1, NSL1, AURKB, SKA1, NCAPH, AURKA, SKA2, CCNB2, CCNB1, DSN1, CDC45, RACGAP1, ECT2, FAM83D, BUB1, CENPW, SPAG5, UBE2C, PLK1, CDC7, CDC6, NDC80, ANLN, TPX2, CENPE, WEE1, APITD1, KIF18B, PRC1, UBE2S, CDK1, NCAPD2, CNTR0B, SPC24, SPC25, MAD2L1                                                                                                                                                                                                                                                                                            |
| Mitotic Nuclear Division                         | 6.98062E-40 | 6.624963972     | ERCC6L, ZWILCH, NCAPG2, CCNF, BUB1B, KIF11, SMC2, CDC20, SGOL1, TUBB3, MIS18BP1, CHEK2, NUF2, NUSAP1, RCC1, NEK2, OIP5, <b>KNTC1</b> , FBXO5, SPDL1, CEP55, HELLS, BORA, KIF23, MASTL, CDC25C, CCSAP, KNSTRN, CIT, CCNA2, CCNA1, ASPM, PSRC1, ESPL1, INCENP, <b>BIRC5</b> , FAM64A, KIF2C, KIF20B, CDCA2, CDCA3, CDCA5, CDCA8, SKA3, PMF1, NSL1, AURKB, SKA1, NCAPH, AURKA, SKA2, CCNB2, CCNB1, DSN1, FAM83D, BUB1, CENPW, SPAG5, UBE2C, PLK1, CDC6, NDC80, ANLN, TPX2, CENPE, WEE1, APITD1, KIF18B, CENPH, CDK1, NCAPD2, CENPN, SPC24, SPC25, MAD2L1                                                                                                                                                                                                                                                                                                                                                                                      |
| DNA Replication                                  | 2.07287E-20 | 7.161424469     | PIF1, FEN1, BLM, 2810417H13RIK, MCM7, MCM8, PRIM1, DSCC1, MCM10, BRCA1, CHTF18, CHAF1B, CDC45, CHAF1A, ORC1, POLE, GINS1, POLQ, GINS2, CDT1, RMI2, RRM1, RRM2, <b>RFC4</b> , LIG1, CDC6, ADRA2A, TICRR, POLA1, DBF4, POLE2, MCM3, MCM5, MCM6, DTL, MCM2                                                                                                                                                                                                                                                                                                                                                                                                                                                                                                                                                                                                                                                                                    |
| Chromosome Segregation                           | 7.07731E-18 | 7.972784358     | TOP2A, CDCA2, BRCA1, KIF11, SKA3, PMF1, NSL1, SKA1, SKA2, DSN1, SGOL1, RCC1, NEK2, OIP5, BUB1, CENPW, SPAG5, ESCO2, KNSTRN, NDC80, CENPE, CENPF, ESPL1, CENPH, INCENP, <b>BIRC5</b> , KIF2C, CENPN, SPC25                                                                                                                                                                                                                                                                                                                                                                                                                                                                                                                                                                                                                                                                                                                                  |
| Cellular Response to DNA Damage Stimulus         | 1.16369E-10 | 2.854623365     | TOP2A, FEN1, MCM7, MCM8, MCM10, BRCA1, FOXM1, BRCA2, PIDD1, CHAF1B, CHAF1A, EXO1, CHEK2, CHEK1, POLE, GEN1, LIG1, H2AFX, TRP73, MASTL, MMS22L, NEIL3, RAD51C, FANCD2, SPATA18, DTL, PIF1, 2810417H13RIK, BLM, PARPBP, <b>UHRF1</b> , UNG, RAD54B, RAD51AP1, BRIP1, RAD54L, CLSPN, E2F7, ZRANB3, BARD1, POLQ, EGLN3, ATAD5, DDIAS, TICRR, RAD51, APITD1, UBE2T, <b>CDKN3</b>                                                                                                                                                                                                                                                                                                                                                                                                                                                                                                                                                                |
| DNA Replication Initiation                       | 7.46665E-10 | 12.23410014     | POLA1, CDC45, <b>CCNE2</b> , MCM7, CCNE1, MCM3, CDC7, MCM5, MCM10, MCM6, CDC6, MCM2                                                                                                                                                                                                                                                                                                                                                                                                                                                                                                                                                                                                                                                                                                                                                                                                                                                        |
| DNA Repair                                       | 3.26326E-08 | 2.846928962     | PIF1, FEN1, BLM, 2810417H13RIK, ANKLE1, PARPBP, MCM8, <b>UHRF1</b> , BRCA1, FOXM1, BRCA2, UNG, RAD51AP1, BRIP1, CHAF1B, CHAF1A, EXO1, CHEK2, CHEK1, RAD54L, CLSPN, POLE, ZRANB3, GEN1, BARD1, POLQ, LIG1, H2AFX, KIF22, TICRR, MMS22L, NEIL3, RAD51C, RAD51, APITD1, FANCD2, UBE2T                                                                                                                                                                                                                                                                                                                                                                                                                                                                                                                                                                                                                                                         |
| Chemokine-Mediated Signaling Pathway             | 2.33183E-07 | 6.22826916      | CCL24, CCL12, <b>CCL11</b> , <b>CXCL3</b> , CXCL13, CXCL5, CCL9, CCL8, CCL7, CCR9, <b>CCL2</b> , ACKR1, PF4                                                                                                                                                                                                                                                                                                                                                                                                                                                                                                                                                                                                                                                                                                                                                                                                                                |
| Cellular Response to Tumor Necrosis Factor       | 4.7248E-07  | 4.226325501     | CCL24, CCL12, <b>EDN1</b> , CALCA, <b>CCL11</b> , BRCA1, ADAMTS12, COL1A1, CCL9, CCL8, <b>FABP4</b> , CCL7, OCSTAMP, <b>CCL2</b> , HAS2, <b>PKC1</b> , <b>PPARGC1A</b> , DBN1, ADAMTS7                                                                                                                                                                                                                                                                                                                                                                                                                                                                                                                                                                                                                                                                                                                                                     |
| Cell Adhesion                                    | 6.56795E-07 | 2.270245386     | PTPRU, SPON2, COL18A1, COL15A1, TENM3, COL16A1, TNFAIP6, LAMA1, TROAP, TNC, THBS2, NID2, WISP1, HAPLN1, CDH3, FLRT2, CDH2, CHL1, HAS1, <b>SPP1</b> , CLCA2, HAS2, CYP1B1, CDH24, NRCAM, NCAM1, EPHB1, AOC3, CADM4, MYBPC2, <b>FN1</b> , MFAP4, SDK1, VCAM, NFASC, COL5A1, COL6A2, CDHR1, COL6A1, <b>ADAM12</b> , COL6A4, CERCAM, CDHR3, COL6A6, COL6A5                                                                                                                                                                                                                                                                                                                                                                                                                                                                                                                                                                                     |
| Cellular Response to Interleukin-1               | 3.8958E-06  | 4.587787551     | CCL24, CCL12, <b>EDN1</b> , <b>CCL11</b> , SAA3, FN1, ADAMTS12, CCL9, CCL8, CCL7, <b>CCL2</b> , HAS2, SOX9, <b>PKC1</b> , ADAMTS7                                                                                                                                                                                                                                                                                                                                                                                                                                                                                                                                                                                                                                                                                                                                                                                                          |
| Collagen Fibril Organization                     | 2.10752E-05 | 6.273897505     | COL1A1, ADAMTS2, <b>COL3A1</b> , COL1A2, COL5A1, LUM, COL11A1, COL5A2, CYP1B1, LOXL2                                                                                                                                                                                                                                                                                                                                                                                                                                                                                                                                                                                                                                                                                                                                                                                                                                                       |
| Chemotaxis                                       | 2.41355E-05 | 3.5250797       | CCL24, CCL12, <b>CCL11</b> , HMGB2, CXCR5, <b>CXCL3</b> , CXCL13, CXCL5, CCL9, CCL8, CCL7, CCR9, C3AR1, <b>CCL2</b> , <b>CCR5</b> , CCR3, PF4                                                                                                                                                                                                                                                                                                                                                                                                                                                                                                                                                                                                                                                                                                                                                                                              |
| Collagen Catabolic Process                       | 3.4529E-05  | 8.156066757     | ADAMTS2, MMP14, <b>MMP13</b> , CTSK, <b>MMP2</b> , MMP19, PRTN3, MMP10                                                                                                                                                                                                                                                                                                                                                                                                                                                                                                                                                                                                                                                                                                                                                                                                                                                                     |
| G1/S Transition of Mitotic Cell Cycle            | 3.68705E-05 | 4.735780698     | TCF19, CDKN2C, <b>CCNE2</b> , CCNE1, CDCA5, RCC1, RHOU, <b>INHBA</b> , SKP2, IQGAP3, POLE, <b>CDKN3</b>                                                                                                                                                                                                                                                                                                                                                                                                                                                                                                                                                                                                                                                                                                                                                                                                                                    |
| G2/M Transition of Mitotic Cell Cycle            | 4.15239E-05 | 6.673145528     | CHEK2, PLK1, CHEK1, <b>BIRC5</b> , MASTL, CDC25C, SKP2, FOXM1, CIT                                                                                                                                                                                                                                                                                                                                                                                                                                                                                                                                                                                                                                                                                                                                                                                                                                                                         |
| Mitotic Spindle Assembly                         | 6.54823E-05 | 6.291822927     | CDC20, TPX2, KIFC1, CHEK2, KIFC5B, <b>BIRC5</b> , NEK2, MYBL2, KIF11                                                                                                                                                                                                                                                                                                                                                                                                                                                                                                                                                                                                                                                                                                                                                                                                                                                                       |
| Protein Heterotrimerization                      | 7.78534E-05 | 9.0146001       | COL1A1, COL1A2, COL6A2, C1QTNF6, COL6A1, <b>ADIPOQ</b> , COL6A4                                                                                                                                                                                                                                                                                                                                                                                                                                                                                                                                                                                                                                                                                                                                                                                                                                                                            |
| Aging                                            | 8.62644E-05 | 2.828693673     | NTRK1, CALCA, <b>ARG1</b> , <b>SERPINF1</b> , ABAT, TYMS, ADRA1A, AURKB, <b>AGT</b> , <b>DCN</b> , ALDH3A1, <b>COL3A1</b> , KRT14, CYP1A1, <b>CCL2</b> , NCAM1, <b>TIMP1</b> , <b>APOE</b> , <b>PKC1</b> , <b>PPARGC1A</b>                                                                                                                                                                                                                                                                                                                                                                                                                                                                                                                                                                                                                                                                                                                 |
| Cytokinesis                                      | 9.99357E-05 | 5.95172439      | PRC1, INCENP, PLK1, <b>BIRC5</b> , KIF23, KIF20A, ECT2, BRCA2, CIT                                                                                                                                                                                                                                                                                                                                                                                                                                                                                                                                                                                                                                                                                                                                                                                                                                                                         |
| Cell Activation                                  | 0.000164448 | 10.48637154     | LYPD1, <b>FN1</b> , LYPD2, <b>IGF1</b> , <b>TIMP1</b> , SLURP1                                                                                                                                                                                                                                                                                                                                                                                                                                                                                                                                                                                                                                                                                                                                                                                                                                                                             |
| Inflammatory Response                            | 0.000190111 | 2.133854675     | CCL12, TPSB2, CALCA, <b>CCL11</b> , CD5L, HMGB2, <b>CXCL1</b> , REG3G, <b>CXCL3</b> , CXCL13, CXCL5, CCL9, CYP26B1, CCL8, CCL7, <b>SPP1</b> , C3AR1, <b>CCL2</b> , BDKRB1, <b>CCR5</b> , CCR3, CCL24, <b>CD163</b> , NR1H4, TRP73, CHIL3, HC, ACKR1, CHIL4, PF4                                                                                                                                                                                                                                                                                                                                                                                                                                                                                                                                                                                                                                                                            |
| Positive Regulation of Protein Kinase C Activity | 0.000262631 | 24.46820027     | CEMP, <b>WNT5A</b> , ROR2, <b>AGT</b>                                                                                                                                                                                                                                                                                                                                                                                                                                                                                                                                                                                                                                                                                                                                                                                                                                                                                                      |
| Cellular Response to Retinoic Acid               | 0.000282918 | 4.140772353     | COL1A1, CYP26A1, CYP26B1, BRINP1, TESC, <b>SERPINF1</b> , OSR1, TNC, <b>CCL2</b> , SOX9, <b>PKC1</b>                                                                                                                                                                                                                                                                                                                                                                                                                                                                                                                                                                                                                                                                                                                                                                                                                                       |
| Response to Drug                                 | 0.000344462 | 2.093149876     | COL18A1, NNMT, MCM7, HMGB2, ABAT, PTN, TYMS, ADRA1A, RAD54B, CCNB1, CDH3, LGALS1, MDK, RAD54L, NCAM1, <b>PPARGC1A</b> , ABCB1B, NTRK1, CBX7, <b>ARG1</b> , <b>MMP2</b> , TRP73, <b>INHBA</b> , COL1A1, ALDH3A1, RAD51, SCGB1A1, CYP1A1, CDK1                                                                                                                                                                                                                                                                                                                                                                                                                                                                                                                                                                                                                                                                                               |
| Cellular Response to Interferon-Gamma            | 0.000411696 | 3.95809122      | CCL24, CCL9, CCL12, <b>EDN1</b> , CCL8, <b>CCL11</b> , GBP10, CCL7, <b>WNT5A</b> , <b>CCL2</b> , AQP4                                                                                                                                                                                                                                                                                                                                                                                                                                                                                                                                                                                                                                                                                                                                                                                                                                      |
| Eosinophil Chemotaxis                            | 0.000474593 | 12.23410014     | CCL24, <b>CCL11</b> , CCL7, <b>CCL2</b> , CCR3                                                                                                                                                                                                                                                                                                                                                                                                                                                                                                                                                                                                                                                                                                                                                                                                                                                                                             |
| Endodermal Cell Differentiation                  | 0.000642531 | 6.343607478     | MMP14, COL11A1, <b>MMP2</b> , COL6A1, <b>FN1</b> , <b>INHBA</b> , NODAL                                                                                                                                                                                                                                                                                                                                                                                                                                                                                                                                                                                                                                                                                                                                                                                                                                                                    |
| Male Gonad Development                           | 0.000645266 | 3.058525034     | RRM1, TESC, <b>WNT5A</b> , HMGB2, LRR6, <b>INHBA</b> , ASPM, MMP14, BRIP1, WT1, SOX8, SOX9, WNT4, BOK                                                                                                                                                                                                                                                                                                                                                                                                                                                                                                                                                                                                                                                                                                                                                                                                                                      |
| Spermatogenesis                                  | 0.000672503 | 1.923789702     | LRGUK, HMGB2, BRCA2, CHTF18, AK7, C330027C09RIK, CLGN, BRIP1, ADAMTS2, CCNB1, CYP26B1, RACGAP1, <b>E2F1</b> , 1110017D15RIK, SOX8, SOX9, TSNAXIP1, CCDC33, TCP11, RPL39L, NDC1, H2AFX, NMES, CDC25C, CIT, CCNA1, ASPM, RAD51C, WT1, MYCBPAP, TRIP13, SPATA18                                                                                                                                                                                                                                                                                                                                                                                                                                                                                                                                                                                                                                                                               |

|                                                               |             |             |                                                                                                                                                                                                                                                                                                                                                 |
|---------------------------------------------------------------|-------------|-------------|-------------------------------------------------------------------------------------------------------------------------------------------------------------------------------------------------------------------------------------------------------------------------------------------------------------------------------------------------|
| Cell Proliferation                                            | 0.000712836 | 2.335600935 | MCM7, <b>UHRF1</b> , MCM10, <b>IGF1</b> , MKI67, BRCA2, AURKB, CKS1B, POLA1, UCHL1, MELK, CKS2, CYP1A1, CDK1, TACC3, FAM83D, BUB1, TSPAN1, <b>CFB</b> , E2F8, BOK                                                                                                                                                                               |
| Extracellular Matrix Organization                             | 0.000764012 | 3.0048667   | VIT, COL18A1, OLFML2B, LAMA1, ELN, <b>FN1</b> , NID2, <b>AGT</b> , CCDC80, COL5A3, ADAMTSL2, COL6A4, VWA1, SOX9                                                                                                                                                                                                                                 |
| Protein Phosphorylation                                       | 0.000768588 | 1.741660089 | LAMA1, BUB1B, TTK, MST1R, PKMYT1, AURKB, AURKA, CCNB1, STK33, CHEK2, GSG2, CHEK1, PBK, NEK2, EPHB2, BUB1, EPHB1, PLK4, NTRK1, CDKL4, NEK5, <b>IGFBP3</b> , PLK1, <b>WNT5A</b> , CDC7, PASK, MASTL, MAPK15, DCLK1, CIT, MAPK10, WEE1, MELK, CCNE1, MAP3K19, CDK1, <b>BIRC5</b> , FAM20C, ROR2, CAMK1G, NEK11                                     |
| Positive Regulation of Inflammatory Response                  | 0.000982989 | 3.883841313 | CCL24, CCL9, CCL12, CCL8, <b>CCL11</b> , <b>FABP4</b> , CCL7, <b>WNT5A</b> , <b>CCL2</b> , <b>CCRS</b>                                                                                                                                                                                                                                          |
| Monocyte Chemotaxis                                           | 0.001053875 | 4.893640054 | CCL24, CCL9, CCL12, CALCA, CCL8, <b>CCL11</b> , CCL7, <b>CCL2</b>                                                                                                                                                                                                                                                                               |
| Collagen Biosynthetic Process                                 | 0.001234537 | 16.31213351 | COL1A1, ADAMTSL3, COL5A1, <b>ARG1</b>                                                                                                                                                                                                                                                                                                           |
| Neutrophil Chemotaxis                                         | 0.001895059 | 3.546115981 | CCL24, CCL9, CCL12, CCL8, <b>CCL11</b> , CCL7, <b>SPP1</b> , <b>CCL2</b> , <b>CXCL1</b> , <b>CXCL3</b>                                                                                                                                                                                                                                          |
| Lymphocyte Chemotaxis                                         | 0.001952452 | 5.1902243   | CCL24, CCL9, CCL12, CCL8, <b>CCL11</b> , CCL7, <b>CCL2</b>                                                                                                                                                                                                                                                                                      |
| Cellular Response to Platelet-Derived Growth Factor Stimulus  | 0.002036809 | 6.383008766 | CCNA2, ERRF1, HAS1, <b>CCL2</b> , HAS2, PTN                                                                                                                                                                                                                                                                                                     |
| Positive Regulation of Transcription, DNA-Templated           | 0.002549274 | 1.65670106  | MEG3, BLM, MYRF, HMGB2, BRCA1, FOXM1, BRCA2, CKS1B, MDK, CHEK2, <b>E2F1</b> , SOX8, SOX9, <b>PPARGC1A</b> , <b>FGF23</b> , WNT4, TESC, ATAD2, <b>WNT5A</b> , TRP73, EBF2, EBF3, <b>IGF1</b> , <b>INHBA</b> , GDF6, KLF15, ETV4, <b>AGT</b> , CCNA2, COL1A1, MLXIP, PSRC1, WT1, LHX2, CKS2, NFE2L3, PGR, ROR2, ZFPM2                             |
| Cilium Movement                                               | 0.002670239 | 4.893640054 | RSPH4A, <b>DNAH10</b> , DNAH5, DNAH6, LRRC6, DNAL1, CCDC40                                                                                                                                                                                                                                                                                      |
| Response to Lipopolysaccharide                                | 0.003005409 | 2.235673121 | SPON2, <b>EDN1</b> , WFDCC21, SPARC, PTGER3, HMGB2, FMO1, <b>CXCL1</b> , <b>CXCL3</b> , CXCL13, LOXL1, CXCL5, <b>DCN</b> , SCGB1A1, CYP1A1, BDKRB1, <b>PCK1</b> , PF4                                                                                                                                                                           |
| Cellular Response to Hypoxia                                  | 0.003196758 | 2.850664109 | FABP1, CCNA2, CCNB1, <b>EDN1</b> , FNDC1, <b>E2F1</b> , TWIST1, <b>HMOX1</b> , PTN, <b>PCK1</b> , <b>PPARGC1A</b> , KCNK2                                                                                                                                                                                                                       |
| Maternal Process Involved In Parturition                      | 0.0032506   | 12.23410014 | <b>EDN1</b> , CYP1A1, <b>CCL2</b> , NODAL                                                                                                                                                                                                                                                                                                       |
| Response to Activity                                          | 0.003537167 | 3.994808207 | NTRK1, <b>EDN1</b> , <b>ADIPOQ</b> , CDK1, <b>CCL2</b> , PTN, <b>PCK1</b> , <b>PPARGC1A</b>                                                                                                                                                                                                                                                     |
| ERK1 and ERK2 Cascade                                         | 0.003598882 | 5.646507755 | <b>CCL11</b> , <b>IGF1</b> , SOX9, IQGAP3, CCR3, <b>AGT</b>                                                                                                                                                                                                                                                                                     |
| Response to Mechanical Stimulus                               | 0.00395037  | 3.495457182 | <b>COL3A1</b> , MMP14, CCNB1, <b>MMP2</b> , TNC, <b>CCL2</b> , BDKRB1, KCNK2, <b>DCN</b>                                                                                                                                                                                                                                                        |
| Immune Response                                               | 0.004000488 | 1.97904561  | H2-EB2, CCL24, CCL12, <b>CCL11</b> , CMA1, MCP14, CXCR5, <b>CXCL1</b> , PRG4, <b>CXCL3</b> , CXCL13, CXCL5, VPREB3, CCL9, CCL8, CCL7, CCR9, <b>CCL2</b> , <b>ENPP3</b> , <b>CCRS</b> , FCGR2B, PF4                                                                                                                                              |
| Positive Regulation of Cell Migration                         | 0.004084037 | 2.169594113 | COL18A1, LRRC15, CCL24, <b>EDN1</b> , CEMIP, <b>CCL11</b> , TNFAIP6, <b>MMP2</b> , ARHGAP39, <b>FN1</b> , <b>IGF1</b> , ADRA2A, COL1A1, MMP14, FAM110C, C3AR1, HAS2, ROR2                                                                                                                                                                       |
| Cell Chemotaxis                                               | 0.004410917 | 3.136948753 | CCL9, CCL12, CCL8, SAA3, HMGB2, <b>CCL2</b> , <b>CXCL1</b> , CXCL13, EPHB1, CXCL5                                                                                                                                                                                                                                                               |
| Spindle Checkpoint                                            | 0.004855424 | 24.46820027 | <b>BIRC5</b> , SPD11, AURKB                                                                                                                                                                                                                                                                                                                     |
| Wound Healing                                                 | 0.004968517 | 2.863300032 | <b>COL1A1</b> , COL3A1, CDH3, SPARC, SERPINB2, <b>WNT5A</b> , ALOX15, TNC, <b>FN1</b> , <b>TIMP1</b> , <b>DCN</b>                                                                                                                                                                                                                               |
| Negative Regulation of Neuron Apoptotic Process               | 0.005968007 | 2.293893775 | GABRB3, NTRK1, CCL12, KIF14, TRP73, FAIM2, <b>AGT</b> , CHL1, MDK, <b>HMOX1</b> , <b>CCL2</b> , <b>BIRC5</b> , <b>APOE</b> , <b>PPARGC1A</b> , BOK                                                                                                                                                                                              |
| Regulation of Cell Cycle                                      | 0.006057104 | 2.621592886 | FOXA1, 2810417H13RIK, <b>CNE2</b> , CCNE1, FIGLN1, CCNF, <b>E2F1</b> , TACC3, MASTL, SKP2, DTL, PRR11                                                                                                                                                                                                                                           |
| Complement Activation, Alternative Pathway                    | 0.006551998 | 9.787280108 | <b>CFD</b> , HC, CFP, <b>CFB</b>                                                                                                                                                                                                                                                                                                                |
| Artery Smooth Muscle Contraction                              | 0.006551998 | 9.787280108 | SMPD3, <b>EDN1</b> , <b>AGT</b> , CACNA1G                                                                                                                                                                                                                                                                                                       |
| Positive Regulation of Cell-Substrate Adhesion                | 0.006781905 | 4.078033378 | VIT, CCDC80, ALOX15, <b>SPP1</b> , PTN, FBLN2, DBN1                                                                                                                                                                                                                                                                                             |
| Positive Regulation of Gtpase Activity                        | 0.006846855 | 2.346265779 | NTRK1, CCL24, CCL12, <b>CCL11</b> , RGS16, <b>WNT5A</b> , ELMOD1, CCL9, CCL8, CCL7, <b>CCL2</b> , ECT2, EZH2, WNT4                                                                                                                                                                                                                              |
| Negative Regulation of Neuron Death                           | 0.00747482  | 3.495457182 | GABRB3, NTRK1, CHGA, MDK, <b>SERPINF1</b> , <b>IGF1</b> , <b>APOE</b> , <b>PPARGC1A</b>                                                                                                                                                                                                                                                         |
| Positive Regulation of Cell-Cell Adhesion                     | 0.007909363 | 6.117050068 | <b>WNT5A</b> , <b>CCL2</b> , <b>CCRS</b> , NODAL, TBX18                                                                                                                                                                                                                                                                                         |
| Extracellular Fibril Organization                             | 0.008738336 | 8.897527371 | MFAP5, MFAP4, <b>COL3A1</b> , COL5A1                                                                                                                                                                                                                                                                                                            |
| Negative Regulation of Angiogenesis                           | 0.00887432  | 3.058525034 | MEG3, SPARC, <b>SERPINF1</b> , <b>CCL2</b> , PTN, THBS2, <b>AGT</b> , <b>DCN</b> , PF4                                                                                                                                                                                                                                                          |
| Response to Axon Injury                                       | 0.009010065 | 4.587787551 | NTRK1, LGALS1, <b>ARG1</b> , CDK1, FOLR1, KCNK2                                                                                                                                                                                                                                                                                                 |
| Cellular Response to Fatty Acid                               | 0.009460302 | 5.825761969 | CCNB1, <b>EDN1</b> , <b>E2F1</b> , <b>UCP1</b> , NR1H4                                                                                                                                                                                                                                                                                          |
| Positive Regulation of Angiogenesis                           | 0.010625841 | 2.426598374 | CCL24, <b>CCL11</b> , CMA1, <b>WNT5A</b> , VASH2, C3AR1, CYP1B1, <b>HMOX1</b> , HC, BRCA1, CCR3, NODAL                                                                                                                                                                                                                                          |
| Prostate Gland Epithelium Morphogenesis                       | 0.01130184  | 8.156066757 | FOXA1, <b>MMP2</b> , TNC, <b>IGF1</b>                                                                                                                                                                                                                                                                                                           |
| Response to Gamma Radiation                                   | 0.011646232 | 4.317917695 | CCL7, FANCD2, CHEK2, TRP73, <b>CCL2</b> , BRCA2                                                                                                                                                                                                                                                                                                 |
| Cellular Response to Transforming Growth Factor Beta Stimulus | 0.011813636 | 3.208944298 | COL1A1, <b>EDN1</b> , <b>ARG1</b> , <b>WNT5A</b> , SOX9, <b>PPARGC1A</b> , DBN1, WNT4                                                                                                                                                                                                                                                           |
| Cell Migration                                                | 0.011825033 | 2.049692169 | <b>MMP2</b> , <b>WNT5A</b> , GFRA1, ADAMTSL2, MMP14, DEPDC1B, CDH2, COL5A1, MDK, FSCN1, BDKRB1, CD248, FAM83D, TSPAN1, NODAL, CTHRC1                                                                                                                                                                                                            |
| Skeletal System Development                                   | 0.012080827 | 2.515422458 | COL1A1, <b>COL3A1</b> , VCAN, <b>EDN1</b> , COL1A2, COL5A2, FAM20C, ROR2, SOX9, HAPLN1, FBN1                                                                                                                                                                                                                                                    |
| Cell Differentiation                                          | 0.012575311 | 1.442996426 | MEG3, PTPRU, LRIG1, TENM3, MYRF, ILDR2, TWIST1, EFNA5, DMKN, CLGN, CDC20, RACGAP1, MDK, CHL1, OCSTAMP, INSC, STMN1, NHS, AGR3, 1110017D15RIK, MYBL2, SOX9, TSNAIP1, CCHCR1, ECT2, MYBL1, <b>FGF23</b> , TCP11, WNT4, NTRK1, SRRM4, TESC, OSR1, <b>WNT5A</b> , NMES, DLK1, TBX18, DCLK1, CIT, CCNA1, MMP19, MYCBPAP, ROR2, TRIP13, SPATA18, DBN1 |
| Embryo Development                                            | 0.015113426 | 2.787516487 | MEG3, RACGAP1, <b>WNT5A</b> , CKS2, <b>BIRC5</b> , LRAT, BUB1, DLK1, CKS1B                                                                                                                                                                                                                                                                      |
| Mast Cell Chemotaxis                                          | 0.015322628 | 14.68092016 | CHGA, <b>CCL11</b> , CCR3                                                                                                                                                                                                                                                                                                                       |
| Positive Regulation of Fibroblast Proliferation               | 0.016408321 | 3.011470803 | CCNA2, CCNB1, <b>WNT5A</b> , <b>E2F1</b> , <b>FN1</b> , <b>IGF1</b> , CDC6, <b>AGT</b>                                                                                                                                                                                                                                                          |
| Regulation of Mitotic Cell Cycle                              | 0.016511596 | 3.96781626  | PLK1, CKS2, TRP73, <b>BIRC5</b> , FBXO5, CKS1B                                                                                                                                                                                                                                                                                                  |
| Negative Regulation of DNA Biosynthetic Process               | 0.017598693 | 6.990914363 | MEG3, CHEK1, <b>ADIPOQ</b> , KCNK2                                                                                                                                                                                                                                                                                                              |
| Cartilage Development                                         | 0.018582161 | 2.685534176 | <b>EDN1</b> , <b>MMP13</b> , LUM, COL11A1, <b>WNT5A</b> , PRRX2, <b>TIMP1</b> , SOX9, TYMS                                                                                                                                                                                                                                                      |
| Positive Regulation of Endothelial Cell Proliferation         | 0.019125342 | 2.921576152 | CCL24, <b>CCL11</b> , <b>ARG1</b> , <b>WNT5A</b> , VASH2, HMGB2, <b>CCL2</b> , CCR3                                                                                                                                                                                                                                                             |
| Cerebral Cortex Development                                   | 0.020595493 | 2.878611797 | ASPM, <b>COL3A1</b> , CDH2, LHX2, MDK, H2AFX, TACC3, KIF14                                                                                                                                                                                                                                                                                      |
| Chromosome Organization Involved In Meiotic Cell Cycle        | 0.022366674 | 12.23410014 | RAD51, <b>CCNE2</b> , CCNE1                                                                                                                                                                                                                                                                                                                     |
| Intramembranous Ossification                                  | 0.022366674 | 12.23410014 | COL1A1, CTSK, <b>MMP2</b>                                                                                                                                                                                                                                                                                                                       |
| Regulation of Cell Proliferation                              | 0.024179707 | 1.832420285 | EGLN3, SPARC, TNC, CDCA7, PRG4, <b>IGF1</b> , BRCA1, <b>CXCL3</b> , CXCL13, FOXM1, BRCA2, CXCL5, NR3C2, CHEK1, SOX9, PF4, EZH2                                                                                                                                                                                                                  |
| Negative Regulation of Smooth Muscle Cell Migration           | 0.025488237 | 6.117050068 | NDRG4, <b>IGFBP3</b> , <b>ADIPOQ</b> , <b>PPARGC1A</b>                                                                                                                                                                                                                                                                                          |
| Axon Regeneration                                             | 0.025488237 | 6.117050068 | DHFR, CHL1, <b>APOE</b> , FOLR1                                                                                                                                                                                                                                                                                                                 |

|                                                                                |             |             |                                                                                                                                                                                                                                                                                               |
|--------------------------------------------------------------------------------|-------------|-------------|-----------------------------------------------------------------------------------------------------------------------------------------------------------------------------------------------------------------------------------------------------------------------------------------------|
| Positive Regulation of Cellular Protein Metabolic Process                      | 0.025488237 | 6.117050068 | <b>UHRF1, ADIPOQ, INHBA, AGT</b>                                                                                                                                                                                                                                                              |
| Negative Regulation of Inflammatory Response                                   | 0.025570731 | 2.531193131 | MIR147, TNFAIP6, <b>SERPINF1, ADIPOQ</b> , PBK, NR1H4, <b>APOE</b> , CD276, IL22RA2                                                                                                                                                                                                           |
| Organ Regeneration                                                             | 0.026050043 | 3.058525034 | CCNA2, PTPRU, NNMT, CDK1, <b>CCL2</b> , MKI67, CXCL5                                                                                                                                                                                                                                          |
| Mitotic Cell Cycle Checkpoint                                                  | 0.029058918 | 4.218655219 | ZWILCH, CHEK1, <b>KNTC1</b> , TTK, MAD2L1                                                                                                                                                                                                                                                     |
| Lung Development                                                               | 0.030531725 | 2.170566153 | FOXA1, ADAMTS2, MMP14, SPARC, <b>ARG1, WNT5A, IGF1</b> , PTN, ZFPM2, NODAL, CCDC40                                                                                                                                                                                                            |
| DNA Damage Checkpoint                                                          | 0.032480729 | 4.078033378 | CHEK2, H2AFX, CHEK1, <b>E2F1</b> , CLSPN                                                                                                                                                                                                                                                      |
| Synapsis                                                                       | 0.032480729 | 4.078033378 | NDC1, BRIP1, <b>CCNE2</b> , FANCD2, CCNE1                                                                                                                                                                                                                                                     |
| Response to Glucocorticoid                                                     | 0.033130294 | 2.609941362 | ALDH3A1, PTPRU, SPARC, MDK, <b>PAPPA, ADIPOQ</b> , SCGB1A1, TYMS                                                                                                                                                                                                                              |
| Positive Regulation of Epithelial Cell Proliferation                           | 0.035259736 | 2.575600028 | OSR1, <b>WNT5A</b> , TWIST1, GAS1, <b>IGF1</b> , SOX9, NODAL, TBX18                                                                                                                                                                                                                           |
| Response to Nicotine                                                           | 0.035533216 | 3.262426703 | DHFR, NTRK1, <b>EDN1</b> , LYPD1, <b>HMOX1</b> , ABAT                                                                                                                                                                                                                                         |
| Proteolysis                                                                    | 0.036506684 | 1.429413762 | <b>CFD</b> , TPSB2, MYRF, MCPT4, CFI, ADAMTS12, MMP23, ADAMTS4, ADAMTS16, UCHL1, ADAM28, ADAMTS2, C1S1, CAPN6, ADAMTS19, CTSK, CLCA2, CPXM1, TPSAB1, ADAMTS7, CMA1, <b>MMP2</b> , ECEL1, PRSS35, MMP10, MMP14, <b>MMP13</b> , ESLP1, <b>PAPPA, ADAM12</b> , MMP19, PRTN3, <b>CFB</b> , PAPPA2 |
| Positive Regulation of Cell Proliferation                                      | 0.037356911 | 1.44461699  | SHC4, COL18A1, TNC, KIF14, PTN, FOXM1, CDC20, ESM1, HAS2, SOX9, <b>TIMP1</b> , FGFBP1, <b>EDN1, WNT5A</b> , CLEC11A, <b>FN1</b> , CDC7, <b>IGF1</b> , <b>AGT</b> , FABP1, ACER2, ALDH3A1, MLXIPL, CENPF, <b>FABP4</b> , PRC1, GAS1, PGR, CD248, KIF20B, FOLR2, NODAL                          |
| Positive Regulation of DNA-Directed DNA Polymerase Activity                    | 0.039550273 | 9.175575101 | <b>RFC4</b> , DSCC1, CHTF18                                                                                                                                                                                                                                                                   |
| Astrocyte Cell Migration                                                       | 0.039550273 | 9.175575101 | CCL12, MMP14, <b>CCL2</b>                                                                                                                                                                                                                                                                     |
| Heart Development                                                              | 0.039676611 | 1.687462088 | <b>EDN1</b> , SPARC, DNAH5, <b>MMP2</b> , OSR1, DAW1, FOX1, PTN, CENPF, VCAN, <b>COL3A1, MMP13</b> , WT1, SOX9, ZFPM2, DRC1, NODAL, FBN1                                                                                                                                                      |
| Positive Regulation of Mitotic Cell Cycle                                      | 0.040002162 | 3.823156292 | FOXA1, CCNB1, CDK1, <b>BIRC5</b> , BRCA2                                                                                                                                                                                                                                                      |
| Regulation of Blood Pressure                                                   | 0.040286262 | 2.76253874  | AOC3, CALCA, <b>EDN1</b> , COL1A2, C3AR1, <b>HMOX1</b> , <b>AGT</b>                                                                                                                                                                                                                           |
| Osteoblast Differentiation                                                     | 0.041634336 | 2.165327458 | COL1A1, VCAN, FIGLN1, <b>IGFBP3</b> , COL6A1, TNC, <b>SPP1</b> , TWIST1, SOX8, <b>IGF1</b>                                                                                                                                                                                                    |
| Ossification                                                                   | 0.042407478 | 2.293893775 | MMP14, SPARC, COL11A1, COL5A2, ALOX15, <b>SPP1</b> , TWIST1, SOX9, PTN                                                                                                                                                                                                                        |
| Positive Regulation of Smooth Muscle Cell Proliferation                        | 0.044674869 | 2.446820027 | <b>EDN1</b> , ORC1, C3AR1, <b>HMOX1, IGF1</b> , SKP2, <b>PPARGC1A</b> , WISP1                                                                                                                                                                                                                 |
| Positive Regulation of ERK1 and ERK2 Cascade                                   | 0.044840304 | 1.82210002  | NTRK1, CCL24, NDRG4, CCL12, <b>CCL11</b> , ALOX15, TREM2, ADRA1A, CCL9, CCL8, CCL7, <b>CCL2</b> , <b>FGF23</b> , NODAL                                                                                                                                                                        |
| Brown Fat Cell Differentiation                                                 | 0.048430684 | 3.598264746 | MRAP, <b>FABP4, ADIPOQ, UCP1</b> , EBF2                                                                                                                                                                                                                                                       |
| Bone Trabecula Formation                                                       | 0.049499272 | 8.156066757 | FBN2, COL1A1, <b>MMP2</b>                                                                                                                                                                                                                                                                     |
| Positive Regulation of Exit From Mitosis                                       | 0.049499272 | 8.156066757 | UBE2C, CDCA5, <b>BIRC5</b>                                                                                                                                                                                                                                                                    |
| Negative Regulation of Peptidase Activity                                      | 0.050054615 | 2.091299168 | ITH5, WFDC8, SERPINB2, CD109, <b>BIRC5</b> , BCO48546, CST9, <b>TIMP1</b> , A2M, NAIP1                                                                                                                                                                                                        |
| Placenta Development                                                           | 0.052314903 | 2.936184032 | GJB3, CCNF, E2F7, NODAL, <b>DCN</b> , E2F8                                                                                                                                                                                                                                                    |
| Negative Regulation of Blood Pressure                                          | 0.052984033 | 3.495457182 | CALCA, PMCH, <b>ADIPOQ</b> , BDKRB1, ABAT                                                                                                                                                                                                                                                     |
| Regulation of Heart Rate                                                       | 0.057761704 | 3.398361149 | RYR2, CALCA, PMCH, <b>AGT</b> , CACNA1G                                                                                                                                                                                                                                                       |
| Positive Regulation of Leukocyte Migration                                     | 0.058577083 | 4.448763686 | AOC3, CCL12, <b>CCL2</b> , BDKRB1                                                                                                                                                                                                                                                             |
| Cell-Cell Signaling                                                            | 0.059674383 | 2.137998082 | FGFBP1, <b>EDN1, WNT5A</b> , CXCL13, <b>CCR5</b> , ADRA1A, WISP1, ADRA2A, WNT4                                                                                                                                                                                                                |
| Cellular Response to Vitamin D                                                 | 0.06023609  | 7.340460081 | TNC, PTN, <b>FGF23</b>                                                                                                                                                                                                                                                                        |
| Positive Regulation of Mesenchymal Cell Proliferation                          | 0.062761717 | 3.30651355  | <b>WNT5A</b> , PRRX2, GAS1, SOX9, TBX18                                                                                                                                                                                                                                                       |
| Cochlea Morphogenesis                                                          | 0.065394973 | 4.255339178 | <b>WNT5A</b> , SOX9, TBX18, CTHRC1                                                                                                                                                                                                                                                            |
| Negative Regulation of Smooth Muscle Cell Proliferation                        | 0.067981582 | 3.219500036 | NDRG4, <b>IGFBP3, ADIPOQ, HMOX1, PPARGC1A</b>                                                                                                                                                                                                                                                 |
| Protein Kinase B Signaling                                                     | 0.067981582 | 3.219500036 | LINGO1, CCL12, <b>CCL2, IGF1</b> , SOX9                                                                                                                                                                                                                                                       |
| Intrinsic Apoptotic Signaling Pathway In Response to DNA Damage                | 0.068556158 | 2.718688919 | CHEK2, <b>E2F1, HMOX1</b> , BRCA1, BRCA2, BOK                                                                                                                                                                                                                                                 |
| Cellular Response to Glucose Stimulus                                          | 0.069459154 | 2.412357773 | MLXIPL, LGALS1, CMA1, <b>SERPINF1</b> , AQP4, <b>IGF1, PPARGC1A</b>                                                                                                                                                                                                                           |
| Regulation of Cellular Protein Localization                                    | 0.071680036 | 6.673145528 | <b>CCNE2</b> , CCNE1, <b>WNT5A</b>                                                                                                                                                                                                                                                            |
| Negative Regulation of Immune Response                                         | 0.071680036 | 6.673145528 | FCRLB, <b>COL3A1</b> , FCGR2B                                                                                                                                                                                                                                                                 |
| Positive Regulation of Insulin-Like Growth Factor Receptor Signaling Pathway   | 0.071680036 | 6.673145528 | CDH3, <b>IGFBP3, IGF1</b>                                                                                                                                                                                                                                                                     |
| Negative Regulation of Tumor Necrosis Factor-Mediated Signaling Pathway        | 0.071680036 | 6.673145528 | <b>ADIPOQ</b> , NR1H4, TRAIP                                                                                                                                                                                                                                                                  |
| Middle Ear Morphogenesis                                                       | 0.07255827  | 4.078033378 | <b>EDN1</b> , OSR1, PRRX2, GAS1                                                                                                                                                                                                                                                               |
| Complement Activation, Classical Pathway                                       | 0.07300579  | 2.669258211 | C1QB, C1QA, C1S1, CFI, HC, <b>C1QC</b>                                                                                                                                                                                                                                                        |
| Cell Fate Commitment                                                           | 0.073295304 | 2.378852804 | <b>WNT5A</b> , GAS1, SOX8, ROR2, SOX9, NODAL, WNT4                                                                                                                                                                                                                                            |
| Regulation of Signal Transduction                                              | 0.079068535 | 3.058525034 | CDH2, 2810408A11R1K, <b>BIRC5</b> , NAIP1, NODAL                                                                                                                                                                                                                                              |
| Positive Regulation of Cytosolic Calcium Ion Concentration                     | 0.081559448 | 1.818582453 | <b>EDN1</b> , PTGER3, PMCH, C3AR1, <b>CXCL1</b> , CXCL13, <b>CCR5</b> , <b>CXCL3</b> , ADRA1A, <b>AGT</b> , CACNA1G                                                                                                                                                                           |
| Cellular Response to Hydrogen Peroxide                                         | 0.082365321 | 2.575600028 | FABP1, <b>ARG1</b> , CDK1, CYP1B1, ECT2, EZH2                                                                                                                                                                                                                                                 |
| Positive Regulation of Cell Growth Involved In Cardiac Muscle Cell Development | 0.083755675 | 6.117050068 | <b>EDN1, IGF1</b> , WISP1                                                                                                                                                                                                                                                                     |
| Skin Development                                                               | 0.087272288 | 2.531193131 | COL1A1, ADAMTS2, <b>COL3A1</b> , COL5A1, GJB3, COL5A2                                                                                                                                                                                                                                         |
| Nervous System Development                                                     | 0.093627566 | 1.427852536 | NTRK1, SRRM4, NRN1, D130043K22RIK, CRMP1, GFRA1, <b>IGF1</b> , EFNA5, DCLK1, CIT, CDC20, DCDC2A, LHX2, CHL1, DPF1, INSC, STMN1, ECT2, EPHB2, EPHB1, DBN1, NODAL                                                                                                                               |
| Response to Hypoxia                                                            | 0.094858812 | 1.65670106  | RYR2, <b>EDN1</b> , EGLN3, <b>MMP2, ADIPOQ</b> , ABAT, LOXL2, ALDH3A1, MMP14, CYP1A1, TACC3, <b>HMOX1, CCL2</b>                                                                                                                                                                               |
| Odontogenesis                                                                  | 0.09599465  | 3.624918559 | OSR1, TWIST1, GAS1, <b>INHBA</b>                                                                                                                                                                                                                                                              |
| Fatty Acid Homeostasis                                                         | 0.096392539 | 5.646507755 | MLXIPL, NR1H4, <b>APOE</b>                                                                                                                                                                                                                                                                    |
| Short-Term Memory                                                              | 0.096392539 | 5.646507755 | BRINP1, MDK, <b>SERPINF1</b>                                                                                                                                                                                                                                                                  |
| Negative Regulation of JAK-STAT Cascade                                        | 0.097259589 | 2.845139566 | LRRCL5, FLRT2, NYX, ASPN, <b>DCN</b>                                                                                                                                                                                                                                                          |
| Microtubule Cytoskeleton Organization                                          | 0.097407459 | 2.039016689 | WEE1, GAS2L3, PRC1, TACC3, NUSAP1, CRMP1, <b>BIRC5</b> , AURKA                                                                                                                                                                                                                                |
