# Supplementary material for: Inhibition of angiogenesis and regenerative lung growth in Lepob/ob mice through adiponectin-VEGF/VEGFR2 signaling
Source: PubMed Central journal article supplement (PMC11521822; doi:10.3389/fcvm.2024.1491971), 2024-10-16
Supplement: Datasheet6.pdf [file Datasheet6.pdf]

|                                                              |             |             |                                                                                                                                                                                                                                                                                                                                                                                                                                                                                                                                                                                                                                                                                                                                                                                                                                                                                           |
|--------------------------------------------------------------|-------------|-------------|-------------------------------------------------------------------------------------------------------------------------------------------------------------------------------------------------------------------------------------------------------------------------------------------------------------------------------------------------------------------------------------------------------------------------------------------------------------------------------------------------------------------------------------------------------------------------------------------------------------------------------------------------------------------------------------------------------------------------------------------------------------------------------------------------------------------------------------------------------------------------------------------|
| Cell Cycle                                                   | 2.58685E-2  | 4.98131113  | ERCC6L, ZWILCH, DSCC1, GMNN, CCNF, DIXDC1, BUB1B, MKI67, SMC2, CDC20, CHEK2, CHEK1, NUSAP1, RCC1, NEK2, OIP5, KNTC1, FOXO5, BORA, LIG1, TRP73, ESCO2, CDC25C, KNSTRN, MELK, CCNE2, CCNE1, FANCD2, FAM64A, KIF20B, CDCA2, CDCA3, CDCA5, CDCA6, PKMYT1, SKA3, PMF1, NCAFH, SKA1, SKA2, CCN2, DSN1, CCN1B, BRINP1, RACGAP1, CLSPN, ECT2, FAM83D, CDT1, UBE2C, DDIA5, PLK1, CDC7, CDC6, NDC80, ANLN, TPX2, KIF18B, UBE2S, CDK1, CNTROB, MCM7, MCM8, NCAPG2, BRCA1, KIF11, CHTF18, FOXM1, BRCA2, CKS1B, SARPB3, CHAF1B, CHAF1A, SGO1, MS18BP1, GSG2, NUF2, MYB12, SPDL1, DUGAP5, CEP55, HELLS, H2AFX, CKAP2, KIF23, MASTL, CCSP, CIT, CCNA2, ASPM, CCNA1, DBF4, PSRC1, INCENP, MCM3, CKS2, BIRC5, GAS1, MCM5, KIF2C, MCM6, MCM2, UHRF1, NSL1, AURKB, AURKA, CDCA5, E2F1, BUB1, E2F7, E2F8, CENPW, CDKN2C, SPAG5, TICRR, CENPE, WEE1, APITD1, PRCL1, NCAPO2, SPC24, MAD2L1, SPC25, NEK11, CDKN3 |
| Cell Division                                                | 9.92865E-41 | 5.691800598 | SPC25, MAD2L1                                                                                                                                                                                                                                                                                                                                                                                                                                                                                                                                                                                                                                                                                                                                                                                                                                                                             |
| Mitotic Nuclear Division                                     | 6.98062E-40 | 6.624963972 | ERCC6L, ZWILCH, NCAPG2, CCNF, KIF14, BUB1B, KIF11, SMC2, CDC20, SGO1, TUBB3, MS18BP1, CHEK2, NUF2, NUSAP1, RCC1, NEK2, OIP5, KNTC1, FOXO5, SPDL1, CEP55, HELLS, BORA, KIF23, MASTL, CDC25C, CCSP, KNSTRN, CIT, CCNA2, CCNA1, ASPM, PSRC1, CKS1B, SARPB3, CHAF1B, CHAF1A, SGO1, MS18BP1, GSG2, NUF2, MYB12, SPDL1, DUGAP5, CEP55, HELLS, H2AFX, PMF1, NSL1, AURKB, SKA1, NCAFH, AURKA, SKA2, CCN2, CCN1B, DSN1, CDCA5, RACGAP1, ECT2, FAM83D, BUB1, CENPW, SPAG5, UBE2C, PLK1, CDC7, CDC6, NDC80, ANLN, TPX2, CENPE, WEE1, APITD1, KIF18B, PRCL1, UBE2S, CDK1, NCAPO2, SPC24, MCM2                                                                                                                                                                                                                                                                                                         |
| DNA Replication                                              | 2.07287E-20 | 7.161424469 | PIF1, FEN1, BLM, ZBTB4, BRCA1, KIF11, SKA3, PMF1, NSL1, SKA1, SKA2, DSN1, SGO1, RCC1, NEK2, OIP5, BUB1, CENPW, SPAG5, ESCO2, GINS1, POLQ, GINS2, CDT1, RRM2, RRM1, RRM2, <b>RFC4</b> , LIG1, CDC6, ADRA2A, TICRR, POLA1, DBF4, POLE2, MCM3, MCM5, MCM6, DTL, MCM2                                                                                                                                                                                                                                                                                                                                                                                                                                                                                                                                                                                                                         |
| Chromosome Segregation                                       | 7.07731E-18 | 7.972784358 | KNSTRN, NDC80, CENPE, CENPF, ESPL1, CENPH, INCENP, <b>BIRCS</b> , KIF2C, CENPN, SPC25                                                                                                                                                                                                                                                                                                                                                                                                                                                                                                                                                                                                                                                                                                                                                                                                     |
| Cellular Response to DNA Damage Stimulus                     | 1.16369E-10 | 2.854623365 | TOP2A, CDCA2, BRCA1, KIF11, SKA3, PMF1, NSL1, SKA1, SKA2, DSN1, SGO1, RCC1, NEK2, OIP5, BUB1, CENPW, SPAG5, ESCO2, H2AFX, TRP73, MASTL, MMS22L, NEIL3, RADS1C, FANCD2, SPATA18, DTL, PIF1, ZBTB417H13RIK, BLM, PARBP, UHRF1, UNG, RADS4B, RADS1AP1, BRIP1, RADS4A, CLSPN, E2F7, ZRANB3, BARD1, POLQ, EGLN3, ATAD5, DDIA5, TICRR, RADS1, APITD1, UBE2T, CDKN3                                                                                                                                                                                                                                                                                                                                                                                                                                                                                                                              |
| DNA Replication Initiation                                   | 7.46665E-10 | 12.23410014 | POLA1, CDCA5, <b>CEN2E</b> , MCM7, CCNE1, MCM1, CDC7, MCM5, MCM10, MCM6, CDC6, MCM2                                                                                                                                                                                                                                                                                                                                                                                                                                                                                                                                                                                                                                                                                                                                                                                                       |
| DNA Repair                                                   | 3.26326E-08 | 2.846928962 | PIF1, FEN1, BLM, ZBTB417H13RIK, ANKLE1, PARRBP, MCM8, UHRF1, BRCA1, FOXM1, BRCA2, UNG, RADS1AP1, BRIP1, CHAF1B, CHAF1A, EXO1, CHEK2, CHEK1, RADS4L, CLSPN, POLE, ZRANB3, GEN1, BARD1, POLQ, UGI, H2AFX, KIF22, TICRR, MMS22L, NEIL3, RADS1C, RADS1, APITD1, FANCD2, UBE2T                                                                                                                                                                                                                                                                                                                                                                                                                                                                                                                                                                                                                 |
| Chemokine-Mediated Signaling Pathway                         | 2.33183E-07 | 6.22826916  | <b>CCL24, CCL12, CCL11, CXCL1, CXCL3, CXCL13, CXCL5, CCL9, CCL8, CCL7, CCR9, CCL2, ACKR1, PF4</b>                                                                                                                                                                                                                                                                                                                                                                                                                                                                                                                                                                                                                                                                                                                                                                                         |
| Cellular Response to Tumor Necrosis Factor                   | 4.7248E-07  | 4.226325501 | <b>PPARGCIA, SRB1, ADAMTS7</b>                                                                                                                                                                                                                                                                                                                                                                                                                                                                                                                                                                                                                                                                                                                                                                                                                                                            |
| Cell Adhesion                                                | 6.56795E-07 | 2.270245386 | PTPRU, SPON2, COL18A1, COL15A1, TENM3, COL16A1, TNFAP6, LAMA1, TROP, TNC, THBS2, NID2, WISP1, HAPLN1, CDH5, FLT2, CDH2, CHL1, HAS1, SPP1, CLCA2, HAS2, CYP18B1, CDH24, NRCAM, NCAM1, EPHB1, AOC3, CADM4, MYBP2, FN1, MFAP4, SDCA1, VCAN                                                                                                                                                                                                                                                                                                                                                                                                                                                                                                                                                                                                                                                   |
| Cellular Response to Interleukin-3                           | 3.8958E-06  | 4.587787551 | <b>CCL24, CCL12, EDN1, CCL11, SAA3, FN1, ADAMTS12, CCL9, CCL8, CCL7, CCL2, HAS2, SOX9, PKC1, ADAMTS7</b>                                                                                                                                                                                                                                                                                                                                                                                                                                                                                                                                                                                                                                                                                                                                                                                  |
| Collagen Fibril Organization                                 | 2.10752E-05 | 6.273897508 | COL1A1, ADAMTS7, COL3A1, COL1A2, COL5A1, LUM, COL11A1, COL5A2, CYP18B1, LOXL2                                                                                                                                                                                                                                                                                                                                                                                                                                                                                                                                                                                                                                                                                                                                                                                                             |
| Chemotaxis                                                   | 2.41355E-05 | 3.5250797   | <b>CCL24, CCL12, CCL11, HMGB2, CXCR3, CXCL3, CXCL13, CXCL5, CCL9, CCL8, CCL7, CCR9, C3AR1, CCL2, CCR5, CCR3, PF4</b>                                                                                                                                                                                                                                                                                                                                                                                                                                                                                                                                                                                                                                                                                                                                                                      |
| Collagen Catabolic Process                                   | 3.4529E-05  | 8.156066757 | ADAMTS2, MMP14, <b>MMP13</b> , CTSC, <b>MMP2</b> , MMP19, PRTN3, MMP10                                                                                                                                                                                                                                                                                                                                                                                                                                                                                                                                                                                                                                                                                                                                                                                                                    |
| G2/M Transition of Mitotic Cell Cycle                        | 3.68705E-05 | 4.735780698 | TCF19, CDKN2C, <b>CEN2E</b> , CCNE1, CDCA5, RCC1, RHOU, INHBA, SKP2, IQGAP3, POLE, <b>CDKN3</b>                                                                                                                                                                                                                                                                                                                                                                                                                                                                                                                                                                                                                                                                                                                                                                                           |
| G2/M Transition of Mitotic Cell Cycle                        | 4.15239E-05 | 6.673145528 | CHEK2, PLK1, CHEK1, <b>BIRCS</b> , MASTL, CDC25C, SKP2, FOXM1, CIT                                                                                                                                                                                                                                                                                                                                                                                                                                                                                                                                                                                                                                                                                                                                                                                                                        |
| Mitotic Spindle Assembly                                     | 6.54823E-05 | 6.291827927 | CDC20, TPX2, KIFC1, CHEK2, KIF5C, <b>BIRCS</b> , NEK2, MYBL2, KIF11                                                                                                                                                                                                                                                                                                                                                                                                                                                                                                                                                                                                                                                                                                                                                                                                                       |
| Protein Heterotrimerization                                  | 7.78534E-05 | 9.0146001   | COL1A1, COL1A2, COL6A2, <b>C1QTNF6</b> , COL6A1, <b>ADIPOQ</b> , COL6A4                                                                                                                                                                                                                                                                                                                                                                                                                                                                                                                                                                                                                                                                                                                                                                                                                   |
| Apoptosis                                                    | 8.62644E-05 | 2.828693673 | <b>APOE, PKC1, PPARGCIA</b>                                                                                                                                                                                                                                                                                                                                                                                                                                                                                                                                                                                                                                                                                                                                                                                                                                                               |
| Cytokinesis                                                  | 9.99357E-05 | 5.95172439  | PRC1, INCENP, PLK1, <b>BIRCS</b> , KIF23, KIF20A, ECT2, BRCA2, CIT                                                                                                                                                                                                                                                                                                                                                                                                                                                                                                                                                                                                                                                                                                                                                                                                                        |
| Cell Activation                                              | 0.000164448 | 10.48637154 | LVPD1, <b>FN1</b> , LVPD2, <b>IGF1</b> , <b>TIMP1</b> , SLURP1                                                                                                                                                                                                                                                                                                                                                                                                                                                                                                                                                                                                                                                                                                                                                                                                                            |
| Inflammatory Response                                        | 0.000190111 | 2.133854675 | <b>CCL12, TPSB2, CALCA, CCL11, CD5L, HMGB2, CXCL1, REG3G, CXCL3, CXCL13, CXCL5, CCL9, CYP26B1, CCL8, CCL7, SPP1, C3AR1, CCL2, BDKRB1, CCR5, CCR3, CCL24, CD163, NR1H4, TRP73, CHL3, HC, ACKR1, CHIL4, PF4</b>                                                                                                                                                                                                                                                                                                                                                                                                                                                                                                                                                                                                                                                                             |
| Positive Regulation of Protein Kinase C Activity             | 0.000262631 | 24.48820027 | <b>COMP, WNT5A, ROR2, AGT</b>                                                                                                                                                                                                                                                                                                                                                                                                                                                                                                                                                                                                                                                                                                                                                                                                                                                             |
| Cellular Response to Retinoic Acid                           | 0.000282918 | 4.140772353 | COL1A1, CYP26A1, CYP26B1, BRINP1, TSC, <b>SERPINF1, OSR1, TNC, CCL2, SOX9, PKC1</b>                                                                                                                                                                                                                                                                                                                                                                                                                                                                                                                                                                                                                                                                                                                                                                                                       |
| Response to Drug                                             | 0.00034462  | 2.093149876 | COL18A1, NNMT, MCM7, HMGB2, ABAT, PTN, TYMS, ADRA1A, RADS4B, CCN1B, CDH3, LIGALS1, MDK, RADS4L, NCAM1, <b>PPARGCIA</b> , ABCB1B, NTRK1, CBX7, <b>ARL1, MMP2</b> , TRP73, <b>INHBA</b> , COL1A1, ALDH3A1, RADS1, SCGB1A1, CYP11A1, CDK1                                                                                                                                                                                                                                                                                                                                                                                                                                                                                                                                                                                                                                                    |
| Cellular Response to Interferon-Gamma                        | 0.000411696 | 3.95809122  | <b>CCL24, CCL9, CCL12, EDN1, CCL8, CCL11, GBP10, CCL7, WNT5A, CCL2, AQP4</b>                                                                                                                                                                                                                                                                                                                                                                                                                                                                                                                                                                                                                                                                                                                                                                                                              |
| Eosinophil Chemotaxis                                        | 0.000474593 | 12.23410014 | <b>CCL24, CCL11, CCL7, CCL2, CCR3</b>                                                                                                                                                                                                                                                                                                                                                                                                                                                                                                                                                                                                                                                                                                                                                                                                                                                     |
| Endothelial Cell Differentiation                             | 0.000642531 | 6.343607478 | MMP14, COL1A1, <b>MMP2</b> , COL6A1, <b>FN1, INHBA</b> , NODAL                                                                                                                                                                                                                                                                                                                                                                                                                                                                                                                                                                                                                                                                                                                                                                                                                            |
| Male Gonad Development                                       | 0.000645266 | 3.058525034 | RRM1, TSC, <b>WNT5A</b> , HMGB2, LRRC6, <b>INHBA</b> , ASPM, MMP14, BRIP1, WT1, SOX9, SOX9, WNT6, BDK                                                                                                                                                                                                                                                                                                                                                                                                                                                                                                                                                                                                                                                                                                                                                                                     |
| Spermatogenesis                                              | 0.000672503 | 1.923789702 | MYCBPAP, TRIP13, SPATA18                                                                                                                                                                                                                                                                                                                                                                                                                                                                                                                                                                                                                                                                                                                                                                                                                                                                  |
| Cell Proliferation                                           | 0.000712836 | 2.335609935 | MCM7, UHRF1, MCM10, <b>IGF1</b> , MKI67, BRCA2, AURKB, CKS1B, POLA1, UCHL1, MELK, CKS2, CYP1A1, CDK1, TACC3, FAM83D, BUB1, TSPAN1, CTRP, E2F8, BOK                                                                                                                                                                                                                                                                                                                                                                                                                                                                                                                                                                                                                                                                                                                                        |
| Extracellular Matrix Organization                            | 0.000764012 | 3.0048667   | VIT, COL18A1, QSOX1, LAMA1, ELN, <b>FN1, NID2, AGT, CTDC8, COL5A3, ADAMTS2, COL6A4, WWA1, SOX9</b>                                                                                                                                                                                                                                                                                                                                                                                                                                                                                                                                                                                                                                                                                                                                                                                        |
| Protein Phosphorylation                                      | 0.000788588 | 1.741660089 | LAMA1, BUB1B, TTK, MST1R, PKMYT1, AURKB, AURKA, CCN1B, STK33, CHEK2, GSG2, CHEK1, PKB, NEK2, EPHB2, BUB1, EPHB1, PLK4, NTRK1, CDKL4, NEK5, IGFBP3, PLK1, WNT5A, CDC7, PAK, MASTL, MAPK15, DCLK1, CIT, MAPK10, WEE1, MELK, CCNE1, MAP3K19, CDK1, BIRCS, FAM20C, ROR2, CAMK1G, NEK11                                                                                                                                                                                                                                                                                                                                                                                                                                                                                                                                                                                                        |
| Positive Regulation of Inflammatory Response                 | 0.000982989 | 3.883841313 | <b>CCL24, CCL9, CCL12, CCL8, CCL11, FAPB4, CCL7, WNT5A, CCL2, CCR5</b>                                                                                                                                                                                                                                                                                                                                                                                                                                                                                                                                                                                                                                                                                                                                                                                                                    |
| Monocyte Chemotaxis                                          | 0.001052875 | 4.893840094 | <b>CCL24, CCL9, CCL12, CALCA, CCL9, CCL11, CCL7, CCL2</b>                                                                                                                                                                                                                                                                                                                                                                                                                                                                                                                                                                                                                                                                                                                                                                                                                                 |
| Collagen Biosynthetic Process                                | 0.001234537 | 16.31213351 | COL1A1, ADAMTS7, COL5A1, <b>ARG1</b>                                                                                                                                                                                                                                                                                                                                                                                                                                                                                                                                                                                                                                                                                                                                                                                                                                                      |
| Neutrophil Chemotaxis                                        | 0.001895059 | 3.546115981 | <b>CCL24, CCL9, CCL12, CCL8, CCL11, CCL7, SPP1, CCL2, CXCL1, CXCL3</b>                                                                                                                                                                                                                                                                                                                                                                                                                                                                                                                                                                                                                                                                                                                                                                                                                    |
| Lymphocyte Chemotaxis                                        | 0.001952452 | 5.1902243   | <b>CCL24, CCL9, CCL12, CCL8, CCL11, CCL7, CCL2</b>                                                                                                                                                                                                                                                                                                                                                                                                                                                                                                                                                                                                                                                                                                                                                                                                                                        |
| Cellular Response to Platelet-Derived Growth Factor Stimulus | 0.002036809 | 6.383008766 | CCNA2, ERF1F1, HAS1, <b>CCL2, HAS2, PTN</b>                                                                                                                                                                                                                                                                                                                                                                                                                                                                                                                                                                                                                                                                                                                                                                                                                                               |
| Positive Regulation of Transcription, DNA-Templated          | 0.002154274 | 1.65670106  | MEG3, BLM, MYRF, HMGB2, BRCA1, FOXM1, BRCA2, CKS1B, MDK, CHEK2, <b>E2F1, SOX8, SOX9, PPARGCIA, GF2F3</b> , WNT4, TESC, ATAD2, WNT5A, TRP73, EBF2, EBF3, <b>IGF1, INHBA</b> , GDF6, KLF15, ETV4, AGT, CCNA2, COL1A1, MLXIP1, PSK1, WT1, LHX2, CKS2, NFE2L3, PGR, ROR2, ZFP82                                                                                                                                                                                                                                                                                                                                                                                                                                                                                                                                                                                                               |
| Cilium Movement                                              | 0.002670239 | 4.893640054 | RSPH8A, <b>DNAH10</b> , DNAH5, DNAH6, LRRC6, <b>DNAI1</b> , CCDC40                                                                                                                                                                                                                                                                                                                                                                                                                                                                                                                                                                                                                                                                                                                                                                                                                        |
| Response to Lipopolysaccharide                               | 0.003005409 | 2.236673121 | <b>PKC1, PF4</b>                                                                                                                                                                                                                                                                                                                                                                                                                                                                                                                                                                                                                                                                                                                                                                                                                                                                          |
| Cellular Response to Hypoxia                                 | 0.003196758 | 2.850664109 | FABP1, CCNA2, CCN1B, <b>EDN1</b> , FNDC1, <b>E2F1, TWIST1, HMOX1, PTN, PKC1, PPARGCIA, KCN2</b>                                                                                                                                                                                                                                                                                                                                                                                                                                                                                                                                                                                                                                                                                                                                                                                           |
| Maternal Process Involved in Parturition                     | 0.0032506   | 12.23410014 | <b>EDN1, CYP11A1, CCL2, NODAL</b>                                                                                                                                                                                                                                                                                                                                                                                                                                                                                                                                                                                                                                                                                                                                                                                                                                                         |
| Response Activity                                            | 0.003537167 | 3.994808207 | NTRK1, <b>EDN1, ADIPOQ, CDK1, CCL2, PTN, PKC1, PPARGCIA</b>                                                                                                                                                                                                                                                                                                                                                                                                                                                                                                                                                                                                                                                                                                                                                                                                                               |
| ERK1 and ERK2 Cascade                                        | 0.003588882 | 5.646507755 | <b>CCL11, IGF1, SOX9, IQGAP3, CCR3, AGT</b>                                                                                                                                                                                                                                                                                                                                                                                                                                                                                                                                                                                                                                                                                                                                                                                                                                               |
| Response to Mechanical Stimulus                              | 0.00395037  | 3.495457182 | <b>COL3A1, MMP14, CCN1B, MMP2</b> , TNC, <b>CCL2, BDKRB1, KCNK12, DCN</b>                                                                                                                                                                                                                                                                                                                                                                                                                                                                                                                                                                                                                                                                                                                                                                                                                 |
| Immune Response                                              | 0.004000488 | 1.97904561  | H2-EB2, CCL24, CCL12, <b>CCL11</b> , CMA1, MCP1A, <b>CKCR3, KCNK11, PRG4, CXCL3, CXCL13, CXCL5, VPREB3, CCL9, CCL8, CCL7, CCR9, CCL2</b>                                                                                                                                                                                                                                                                                                                                                                                                                                                                                                                                                                                                                                                                                                                                                  |
| Positive Regulation of Cell Migration                        | 0.004084037 | 2.169594113 | COL18A1, LRRC15, CCL24, <b>EDN1</b> , EMP, <b>CCL11</b> , TNFAIP6, <b>MMP2, ARHGFB3, FN1, IGF1</b> , ADRA2A, COL1A1, MMP14, FAM110C, C3AR1, HAS2, ROR2                                                                                                                                                                                                                                                                                                                                                                                                                                                                                                                                                                                                                                                                                                                                    |

- Categories
- Adhesion/Migration
- Cell Cycle/Apoptosis
- Inflammatory/Immune Response
- Cell Signaling
